# Supplementary material for: Age at symptom onset and death and disease duration in genetic frontotemporal dementia: an international retrospective cohort study
Source: PubMed Central journal article supplement — Lancet Neurol. Author manuscript; Available in PMC 2021 Feb 1. (PMC7007771; doi:10.1016/s1474-4422(19)30394-1), 2019-12-03
Supplement: NIHMS1067362-supplement-Supplement.pdf [file NIHMS1067362-supplement-Supplement.pdf]

# THE LANCET

## Neurology

### Supplementary appendix

This appendix formed part of the original submission and has been peer reviewed. We post it as supplied by the authors.

Supplement to: Moore KM, Nicholas J, Grossman M, et al. Age at symptom onset and death and disease duration in genetic frontotemporal dementia: an international retrospective cohort study. *Lancet Neurol* 2019; published online Dec 3. [http://dx.doi.org/10.1016/S1474-4422\(19\)30394-1](http://dx.doi.org/10.1016/S1474-4422(19)30394-1).

**A worldwide cohort study of age at symptom onset and death and disease duration in genetic frontotemporal dementia**

*Moore et al.*

**Supplementary Appendix**

| <b>Sections</b>                                                                                                           | <b>Page</b> |
|---------------------------------------------------------------------------------------------------------------------------|-------------|
| <b>1) GRN and MAPT pathogenic variants included in the study</b>                                                          | <b>2</b>    |
| <b>2) Detailed statistical methods</b>                                                                                    | <b>15</b>   |
| <b>3) Geographical distribution</b>                                                                                       | <b>20</b>   |
| <b>4) Clinical phenotype</b>                                                                                              | <b>24</b>   |
| <b>5) Sex distribution</b>                                                                                                | <b>33</b>   |
| <b>6) Ranges of age at onset, age at death and disease duration in each genetic group and in the individual mutations</b> | <b>35</b>   |
| <b>7) Cumulative percentage probability of symptom onset in the genetic groups</b>                                        | <b>39</b>   |
| <b>8) Generational analysis</b>                                                                                           | <b>41</b>   |
| <b>9) Sex analysis</b>                                                                                                    | <b>44</b>   |
| <b>10) Phenotype analysis</b>                                                                                             | <b>45</b>   |
| <b>11) Disease duration analysis in MAPT mutation carriers</b>                                                            | <b>47</b>   |
| <b>12) Modelling variability in age at onset and age at death</b>                                                         | <b>49</b>   |

## Section 1) GRN and MAPT pathogenic variants included in the study

Supplementary Figure 1: Flow chart for inclusion of GRN and MAPT variants in the study.

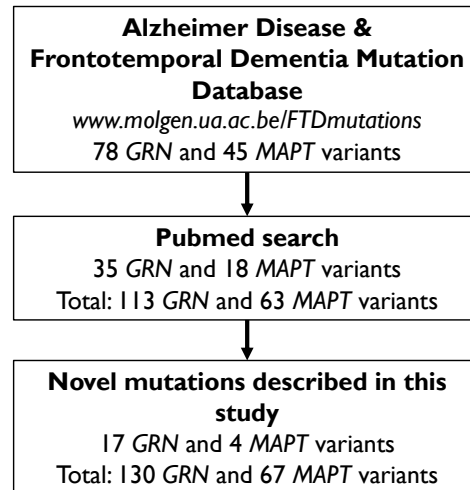

The 35 GRN and 18 MAPT variants included in the study from the Pubmed search are shown with references in Supplementary Tables 1 (GRN) and 2 (MAPT) below. It was noted that the AD&FTD Mutation Database had not been updated for some time. Novel mutations described in the study are shown in Supplementary Tables 3 and 4.

### Inclusion/exclusion criteria

All mutations were reviewed by two geneticists (RG/JB) to examine pathogenicity (as not all GRN and MAPT variants are pathogenic), and were only included if both agreed on their likely pathogenic nature. For GRN, mutations causing haploinsufficiency, due to a frameshift mutation or insertion of a stop codon, were all included as likely pathogenic. The literature on GRN missense mutations is less clear as to whether these are likely to be pathogenic or represent risk factors (apart from A9D which affects the signal peptide and is therefore likely to be pathogenic). We only included missense mutations where there was evidence in the literature of a) low progranulin levels (in blood or CSF) similar to those causing haploinsufficiency (rather than intermediate levels as seen in some missense mutations), or b) functional evidence of pathogenicity, and c) no contrary evidence that the mutation was not pathogenic (e.g. the C139R variant has been shown to be associated with Alzheimer's disease (AD) pathology rather than TDP-43 inclusions as would be expected for GRN mutations<sup>43</sup>).<sup>6,24,44</sup> C9orf72 families with intermediate length expansions (<30 repeats) were not included in the study. Lastly, we did not include in the analysis families with dual mutations e.g. the combination of a C9orf72 expansion and a pathogenic GRN or MAPT mutation.

**Supplementary Table 1: GRN mutations found in Pubmed search.**

| GRN         | Mutation                                          | Predicted protein change | Mutation alias          | Reference |
|-------------|---------------------------------------------------|--------------------------|-------------------------|-----------|
| Intron 1-12 |                                                   |                          | delGRN[London]          | 1         |
| Exon 2      | NM_002087.2:c.58dup;p.(Cys20Leufs*45)             | p.C20LfsX45              | <b>C20fs</b>            | 2         |
| Exon 2      | NM_002087.2:c.78C>A;p.(Cys26*)                    | p.C26X                   | <b>C26X</b>             | 2         |
| Exon 2      | NM_002087.2:c.117dup;p.(Ser40Glnfs*25)            | p.S40QfsX25              | <b>S40fs</b>            | 2         |
| Intron 2    | NM_002087.2:c.139del;p.(Asp47Thrfs*7)             | p.D47TfsX7               | <b>D47fs</b>            | 3         |
| Intron 3    | NM_002087.2:c.265-2del                            |                          | <b>IVS3-2delA</b>       | 4         |
| Exon 4      | NM_002087.2:c.280del;p.(Asp94Metfs*162)           | p.D94MfsX162             | <b>D94fs</b>            | 2         |
| Exon 4      | NM_002087.2:c.314dup;p.(Cys105Trpfs*14)           | p.C105fs                 | <b>C105fs</b>           | 5         |
| Exon 4      | NM_002087.2:c.314G>A;p.(Cys105Tyr)                | p.C105Y                  | <b>C105Y</b>            | 6         |
| Exon 5      | NM_002087.2:c.378C>A;p.(Cys126*)                  | p.C126X                  | <b>C126X</b>            | 3         |
| Exon 5      | NM_002087.2:c.421_422del;p.(Val141Tyrfs*18)       | p.V141YfsX18             | <b>V141fs</b>           | 2         |
| Exon 5      | NM_002087.2:c.445_446del;p.(Cys149Leufs*10)       | p.C149fsX10              | <b>C149fs</b>           | 7         |
| Exon 6      | NM_002087.2:c.481_482del;p.(Arg161Glyfs*36)       | p.R161GfsX36             | <b>R161fs</b>           | 8         |
| Exon 6      | NM_002087.2:c.559del;p.(Leu187Trpfs*69)           | p.L187WfsX69             | <b>L187fs (559del)</b>  | 2         |
| Exon 7      | NM_002087.2:c.607del;p.(Ser203Profs*53)           | p.S203PfsX53             | <b>S203fs (607delT)</b> | 2,9       |
| Exon 7      | NM_002087.2:c.687T>A;p.(Tyr229*)                  | p.Y229X                  | <b>Y229X</b>            | 10        |
| Intron 7    | NM_002087.2:c.708+5_8delGTGA                      |                          | <b>IVS7+5_8delGTGA</b>  | 11, 12    |
| Intron 7    | NM_002087.2:c.708+6_9delTGAG                      |                          | <b>IVS7+6_9delTGAG</b>  | 2, 13, 14 |
| Intron 7    | NM_002087.2:c.709-2A>T                            |                          | <b>IVS7-2A&gt;T</b>     | 15,16     |
| Intron 8    | NM_002087.2:c.833_834del;p.(Thr278Serfs*7)        | p.T278SfsX7              | <b>T278fs</b>           | 17        |
| Intron 8    | NM_002087.2:c.836-1G>T                            |                          | <b>IVS8-1G&gt;T</b>     | 18        |
| Exon 9      | NM_002087.2:c.903_904insTG;p.(Gly302Trpfs*60)     | p.G302WfsX60             | <b>G302fs</b>           | 19        |
| Exon 9      | NM_002087.2:c.907del;p.(Ala303Profs*58)           | p.A303PfsX58             | <b>A303fs (907delG)</b> | 2         |
| Intron 9    | NM_002087.2:c.933+1del                            |                          | <b>IVS9+1delG</b>       | 20        |
| Exon 10     | NM_002087.2:c.975del;p.(Phe326Leufs*35)           | p.F326LfsX35             | <b>F326fs</b>           | 2         |
| Exon 10     | NM_002087.2:c.988_989del;p.(Thr330Alafs*6)        | p.T330AfsX6              | <b>T330fs</b>           | 2         |
| Exon 10     | NM_002087.2:c.1013_1024del;p.(Gly338_Gln341del)   | p.Q337_340del            | <b>Q337_340del</b>      | 21        |
| Exon 10     | NM_002087.2:c.1012_1013delinsC;p.(Gly338Argfs*23) | p.G338RfsX23             | <b>G338fs</b>           | 22        |
| Exon 10     | NM_002087.2:c.1048dup;p.(Ala350Glyfs*18)          | p.A350GfsX18             | <b>A350fs</b>           | 23        |
| Exon 10     | NM_002087.2:c.1117C>T;p.(Pro373Ser)               | p.P373S                  | <b>P373S</b>            | 24        |
| Intron 10   | NM_002087.2:c.1179del;p.(Ala394Leufs*18)          | p.A394LfsX18             | <b>A394fs</b>           | 25        |
| Exon 11     | NM_002087.2:c.1212C>A;p.(Cys404*)                 | p.C404X                  | <b>C404X</b>            | 26        |
| Exon 11     | NM_002087.2:c.1246dup;p.(Cys416Leufs*30)          | p.C416LfsX30             | <b>C416fs</b>           | 26        |
| Exon 11     | NM_002087.2:c.1354del;p.(Val452Trpfs*39)          | p.V452WfsX39             | <b>V452fs</b>           | 3         |
| Exon 12     | NM_002087.2:c.1612C>T;p.(Arg538*)                 | p.R538X                  | <b>R538X</b>            | 2         |

**Supplementary Table 2: MAPT mutations found in Pubmed search.**

| <b>MAPT</b> | <b>Mutation</b>                        | <b>Predicted protein change</b> | <b>Mutation alias</b> | <b>Reference</b> |
|-------------|----------------------------------------|---------------------------------|-----------------------|------------------|
| Exon 2      | NM_001123066.3:c.163G>A:p.(Gly55Arg)   | p.G55R (p.G55R)                 | <b>G55R</b>           | 27               |
| Intron 9    | NM_001123066.3:c.1828-15T>C            |                                 | <b>IVS9-15T&gt;C</b>  | 28               |
| Exon 10     | NM_001123066.3:c.1856T>G:p.(Leu619Arg) | p.L284R (p.L619R)               | <b>L284R</b>          | 29               |
| Exon 10     | NM_001123066.3:c.1858A>C:p.(Ser620Arg) | p.S285R (p.S620R)               | <b>S285R</b>          | 22               |
| Exon 10     | NM_001123066.3:c.1876T>C:p.(Cys626Arg) | p.C291R (p.C626R)               | <b>C291R</b>          | 30               |
| Exon 10     | NM_001123066.3:c.1897A>G:p.(Lys633Glu) | p.K298E (p.K633E)               | <b>K298E</b>          | 31               |
| Exon 10     | NM_001123066.3:c.1915G>A:p.(Gly639Ser) | p.G304S (p.G639S)               | <b>G304S</b>          | 32               |
| Intron 10   | NM_001123066.3:c.1920+4A>C             |                                 | <b>IVS10+4A&gt;C</b>  | 28               |
| Intron 10   | NM_001123066.3:c.1920+15A>C            |                                 | <b>IVS10+15A&gt;C</b> | 33               |
| Exon 11     | NM_001123066.3:c.1999C>T:p.(Pro667Ser) | p.P332S (p.P667S)               | <b>P332S</b>          | 34               |
| Exon 12     | NM_001123066.3:c.2013G>C:p.(Gln671His) | p.Q336H (p.Q671H)               | <b>Q336H</b>          | 35               |
| Exon 12     | NM_001123066.3:c.2057A>G:p.(Gln686Arg) | p.Q351R (p.Q686R)               | <b>Q351R</b>          | 36               |
| Exon 12     | NM_001123066.3:c.2071T>A:p.(Ser691Thr) | p.S356T (p.S691T)               | <b>S356T</b>          | 37               |
| Exon 12     | NM_001123066.3:c.2093T>C:p.(Val698Ala) | p.V363A (p.V698A)               | <b>V363A</b>          | 38               |
| Exon 12     | NM_001123066.3:c.2095C>T:p.(Pro699Ser) | p.P364S (p.P699S)               | <b>P364S</b>          | 39,40            |
| Exon 12     | NM_001123066.3:c.2101G>A:p.(Gly701Arg) | p.G366R (p.G701R)               | <b>G366R</b>          | 39               |
| Exon 13     | NM_001123066.3:c.2120A>G:p.(Glu707Gly) | p.E372G (p.E707G)               | <b>E372G</b>          | 41               |
| Exon 13     | NM_001123066.3:c.2233A>C:p.(Asn745His) | p.N410H (p.N745H)               | <b>N410H</b>          | 42               |

**Supplementary Table 3: Novel GRN mutations reported in this study.**

| <b>GRN</b>  | <b>Mutation</b>                                | <b>Predicted protein change</b> | <b>Mutation alias</b>                                    |
|-------------|------------------------------------------------|---------------------------------|----------------------------------------------------------|
| Intron 1-12 |                                                |                                 | <b>delGRN[Tubingen]</b><br>(chr17:42,426,438-42,430,018) |
| Exon 2      | NM_002087.2:c.87dup;p.(Cys30Leufs*35)          | p.C30LfsX35                     | <b>C30fs</b>                                             |
| Intron 2    | NM_002087.2:c.139-4C>T                         |                                 | <b>IVS2-4C&gt;T</b>                                      |
| Exon 3      | NM_002087.2:c.232dup;p.(Ser78Phefs*41)         | p.S78FfsX41                     | <b>S78fs</b>                                             |
| Exon 4      | NM_002087.2:c.295_308del;p.(Cys99Profs*15)     | p.Cys99fsX15                    | <b>C99fs</b>                                             |
| Intron 4    | NM_002087.2:c.349+1G>C                         |                                 | <b>IVS4+1G&gt;C</b>                                      |
| Intron 4    | NM_002087.2:c.350-1G>T                         |                                 | <b>IVS4-1G&gt;T</b>                                      |
| Exon 5      | NM_002087.2:c.559dup;p.(Leu187Profs*11)        | p.L187PfsX11                    | <b>L187fs (559dup)</b>                                   |
| Exon 8      | NM_002087.2:c.745C>T;p.(Gln249*)               | p.Q249X                         | <b>Q249X</b>                                             |
| Exon 8      | NM_002087.2:c.759_760dup;p.(Asp254Valfs*3)     | p.D254VfsX3                     | <b>D254fs</b>                                            |
| Exon 8      | NM_002087.2:c.761_762insTG;p.(Leu255Alafs*2)   | p.L255AfsX2                     | <b>L255fs</b>                                            |
| Exon 10     | NM_002087.2:c.988_989dup;p.(Gln331Argfs*31)    | p.Q331RfsX31                    | <b>Q331fs</b>                                            |
| Intron 10   | NM_002087.2:c.1179+3A>G                        |                                 | <b>IVS10+3A&gt;G</b>                                     |
| Exon 11     | NM_002087.2:c.1196_1197del;p.(D399Afs*14)      | p.D399AfsX14                    | <b>D399fs</b>                                            |
| Exon 11     | NM_002087.2:c.1256_1263dup;p.(Ile422Gluufs*72) | p.I422EfsX72                    | <b>I422fs</b>                                            |
| Exon 12     | NM_002087.2:c.1428_1431del;p.(Glu476Aspfs*14)  | p.E476DfsX14                    | <b>E476fs</b>                                            |
| Exon 12     | NM_002087.2:c.1446C>A;p.(Cys482*)              | p.C482X                         | <b>C482X</b>                                             |

**Supplementary Table 4: Novel MAPT mutations reported in this study.**

| <b>MAPT</b> | <b>Mutation</b>                        | <b>Predicted protein change</b> | <b>Mutation alias</b> |
|-------------|----------------------------------------|---------------------------------|-----------------------|
| Exon 9      | NM_001123066.3:c.1816G>C;p.(Gly606Arg) | p.G271R (p.G606R)               | <b>G271R</b>          |
| Intron 9    | NM_001123066.3:c.1828-11G>C            |                                 | <b>IVS9-11G&gt;C</b>  |
| Intron 9    | NM_001123066.3:c.1828-10G>C            |                                 | <b>IVS9-10G&gt;C</b>  |
| Intron 10   | NM_001123066.3:c.1920+12C>A            |                                 | <b>IVS10+12C&gt;A</b> |

Of note, the majority of the *GRN* mutations found either via a Pubmed search or newly described here are expected to cause haploinsufficiency. We also included two missense mutations: C105Y has been studied functionally and shown to affect both progranulin secretion and cleavage by elastase suggesting it is pathogenic (ref 6), whilst P373S has been shown to be associated with very low progranulin levels in CSF (ref 24).

In total therefore we report 130 mutations in *GRN* and 67 mutations in *MAPT*, a much larger number than previously described, either in previous reviews or current online databases. The majority of these mutations are reported in 5 or fewer families, with only 50 mutations in *GRN* and 23 mutations in *MAPT* reported in more than 5 families. A complete table of mutations included in the study is shown below in Supplementary Table 5 with number of participants and means for age at onset (AAO), age at death (AAD) and disease duration (DD).

**Supplementary Table 5. Individual genetic mutations included within the GRN and MAPT mutation groups, with mean age at onset (AAO), age at death (AAD) and disease duration (DD).**

**N = number: for AAO, AAD and DD this is the number of participants with available data.**

| GRN           | Mutation                                   | Predicted protein change | Mutation alias   | N total | N families | N AAO | Mean AAO | N AAD | Mean AAD | N DD | Mean DD |
|---------------|--------------------------------------------|--------------------------|------------------|---------|------------|-------|----------|-------|----------|------|---------|
| Complete gene |                                            |                          | delGRN[DR184]    | 1       | 1          | 1     | 71.0     | 1     | 74.0     | 1    | 3.0     |
| Intron 1      | NM_002087.2:c.-8+3A>T                      |                          | IVS1+3A>T        | 1       | 1          | 1     | 58.0     | 0     |          | 0    |         |
| Intron 1      | NM_002087.2:c.-8+5G>C                      |                          | IVS1+5G>C        | 35      | 26         | 35    | 61.2     | 25    | 67.0     | 25   | 5.4     |
| Intron 1-12   |                                            |                          | delGRN[London]   | 7       | 1          | 2     | 53.0     | 4     | 58.3     | 1    | 4.0     |
| Intron 1-12   |                                            |                          | delGRN[French]   | 16      | 9          | 14    | 61.6     | 7     | 72.7     | 5    | 8.9     |
| Intron 1-12   |                                            |                          | delGRN[Tubingen] | 1       | 1          | 1     | 51.0     | 0     |          | 0    |         |
| Exon 2        | NM_002087.2:c.1A>G                         | p.M1                     | M1 (1A>G)        | 8       | 2          | 7     | 54.6     | 5     | 63.0     | 4    | 7.3     |
| Exon 2        | NM_002087.2:c.2T>C                         | p.M1                     | M1 (2T>C)        | 4       | 3          | 4     | 56.5     | 2     | 66.0     | 2    | 11.0    |
| Exon 2        | NM_002087.2:c.3G>A                         | p.M1                     | M1 (3G>A)        | 2       | 1          | 1     | 62.0     | 2     | 68.0     | 1    | 10.0    |
| Exon 2        | NM_002087.2:c.26C>A;p.(Ala9Asp)            | p.A9D                    | A9D              | 37      | 4          | 36    | 62.1     | 31    | 71.7     | 30   | 9.3     |
| Exon 2        | NM_002087.2:c.58dup;p.(Cys20Leufs*45)      | p.C20LfsX45              | C20fs            | 0       |            | 0     |          | 0     |          | 0    |         |
| Exon 2        | NM_002087.2:c.63_64insC;p.(Asp22Argfs*43)  | p.D22RfsX43              | D22fs            | 9       | 3          | 8     | 62.0     | 7     | 68.6     | 7    | 7.0     |
| Exon 2        | NM_002087.2:c.78C>A;p.(Cys26*)             | p.C26X                   | C26X             | 0       |            | 0     |          | 0     |          | 0    |         |
| Exon 2        | NM_002087.2:c.87dup;p.(Cys30Leufs*35)      | p.C30LfsX35              | C30fs            | 3       | 2          | 3     | 59.7     | 1     | 68.0     | 1    | 8.0     |
| Exon 2        | NM_002087.2:c.87_90dup;p.(Cys31Leufs*35)   | p.C31LfsX35              | C31fs            | 47      | 10         | 32    | 60.3     | 31    | 65.0     | 25   | 5.9     |
| Exon 2        | NM_002087.2:c.102del;p.(Gly35Glnfs*19)     | p.G35EfsX19              | G35fs            | 42      | 10         | 40    | 61.2     | 31    | 63.2     | 30   | 5.1     |
| Exon 2        | NM_002087.2:c.117dup;p.(Ser40Glnfs*25)     | p.S40QfsX25              | S40fs            | 0       |            | 0     |          | 0     |          | 0    |         |
| Intron 2      | NM_002087.2:c.138+1G>A                     |                          | IVS2+1G>A        | 3       | 1          | 3     | 62.0     | 1     | 63.0     | 1    | 7.0     |
| Intron 2      | NM_002087.2:c.139-4C>T                     |                          | IVS2-4C>T        | 1       | 1          | 1     | 70.0     | 0     |          | 0    |         |
| Intron 2      | NM_002087.2:c.139del;p.(Asp47Thrfs*7)      | p.D47TfsX7               | D47fs            | 1       | 1          | 1     | 68.0     | 1     | 72.0     | 1    | 4.0     |
| Exon 3        | NM_002087.2:c.154del;p.(Thr52Hisfs*2)      | p.T52HfsX2               | T52fs            | 37      | 9          | 33    | 67.8     | 25    | 76.7     | 24   | 7.0     |
| Exon 3        | NM_002087.2:c.232dup;p.(Ser78Phefs*41)     | p.S78PfsX41              | S78fs            | 2       | 1          | 2     | 53.0     | 0     |          | 0    |         |
| Exon 3        | NM_002087.2:c.234_235del;p.(Gly79Aspfs*39) | p.G79DfsX39              | G79fs            | 2       | 1          | 2     | 56.0     | 2     | 67.0     | 2    | 11.0    |
| Exon 3        | NM_002087.2:c.243del;p.(Ser82Valfs*174)    | p.S82VfsX174             | S82fs            | 31      | 1          | 24    | 60.1     | 21    | 66.2     | 19   | 6.9     |
| Exon 3        | NM_002087.2:c.255del;p.(Phe86Serfs*170)    | p.F86SfsX170             | F86fs            | 0       |            | 0     |          | 0     |          | 0    |         |
| Intron 3      | NM_002087.2:c.264+2T>C                     |                          | IVS3+2T>C        | 5       | 4          | 5     | 65.8     | 2     | 65.0     | 2    | 4.0     |
| Intron 3      | NM_002087.2:c.265-2del                     |                          | IVS3-2delA       | 3       | 1          | 3     | 56.0     | 1     | 69.0     | 1    | 4.0     |
| Exon 4        | NM_002087.2:c.280del;p.(Asp94Metfs*162)    | p.D94MfsX162             | D94fs            | 0       |            | 0     |          | 0     |          | 0    |         |
| Exon 4        | NM_002087.2:c.295_308del;p.(Cys99Profs*15) | p.Cys99fsX15             | C99fs            | 2       | 1          | 2     | 63.5     | 1     | 66.0     | 1    | 5.0     |
| Exon 4        | NM_002087.2:c.299del;p.(Pro100Hisfs*156)   | p.P100HfsX156            | P100fs           | 1       | 1          | 1     | 60.0     | 0     |          | 0    |         |
| Exon 4        | NM_002087.2:c.314dup;p.(Cys105Trpfs*14)    | p.C105fs                 | C105fs           | 1       | 1          | 1     | 60.0     | 1     | 64.0     | 1    | 4.0     |
| Exon 4        | NM_002087.2:c.314G>A;p.(Cys105Tyr)         | p.C105Y                  | C105Y            | 4       | 1          | 4     | 65.8     | 0     |          | 0    |         |
| Exon 4        | NM_002087.2:c.328C>T;p.(Arg110*)           | p.R110X                  | R110X            | 8       | 5          | 7     | 59.6     | 3     | 66.3     | 2    | 9.0     |
| Exon 4        | NM_002087.2:c.347C>A;p.(Ser116*)           | p.S116X                  | S116X            | 1       | 1          | 1     | 57.0     | 0     |          | 0    |         |
| Intron 4      | NM_002087.2:c.349+1G>C                     |                          | IVS4+1G>C        | 1       | 1          | 1     | 58.0     | 0     |          | 0    |         |
| Intron 4      | NM_002087.2:c.350-1G>T                     |                          | IVS4-1G>T        | 6       | 2          | 6     | 58.7     | 4     | 63.0     | 4    | 3.5     |
| Exon 5        | NM_002087.2:c.350_462del;p.(Asn118Phefs*4) | p.N118PfsX4              | N118fs           | 1       | 1          | 1     | 56.0     | 1     | 62.0     | 1    | 6.0     |
| Exon 5        | NM_002087.2:c.361del;p.(Val121Trpfs*135)   | p.V121WfsX135            | V121fs           | 6       | 1          | 4     | 58.8     | 3     | 69.7     | 2    | 6.0     |
| Exon 5        | NM_002087.2:c.373C>T;p.(Gln125*)           | p.Q125X                  | Q125X            | 10      | 1          | 7     | 59.3     | 5     | 71.2     | 5    | 7.8     |
| Exon 5        | NM_002087.2:c.378C>A;p.(Cys126*)           | p.C126X                  | C126X            | 2       | 1          | 2     | 52.5     | 2     | 62.5     | 2    | 10.0    |
| Exon 5        | NM_002087.2:c.380_381del;p.(Pro127Argfs*2) | p.P127RfsX2              | P127fs           | 2       | 2          | 2     | 55.5     | 0     |          | 0    |         |

| GRN      | Mutation                                      | Predicted protein change | Mutation alias                 | N total | N families | N AAO | Mean AAO | N AAD | Mean AAD | N DD | Mean DD |
|----------|-----------------------------------------------|--------------------------|--------------------------------|---------|------------|-------|----------|-------|----------|------|---------|
| Exon 5   | NM_002087.2:c.384_387del:p.(Gln130Serfs*125)  | p.Q130SfsX125            | <b>Q130fs (384_387delTAGT)</b> | 4       | 2          | 2     | 51.5     | 3     | 76.3     | 1    | 9.0     |
| Exon 5   | NM_002087.2:c.388_391del:p.(Gln130Serfs*125)  | p.Q130SfsX125            | <b>Q130fs (388_391delCAGT)</b> | 23      | 11         | 20    | 67.4     | 11    | 80.7     | 10   | 6.9     |
| Exon 5   | NM_002087.2:c.421_422del:p.(Val141Tyrfs*18)   | p.V141YfsX18             | <b>V141fs</b>                  | 3       | 1          | 2     | 57.0     | 2     | 62.0     | 1    | 7.0     |
| Exon 5   | NM_002087.2:c.445_446del:p.(Cys149Leufs*10)   | p.C149fsX10              | <b>C149fs</b>                  | 9       | 2          | 8     | 69.4     | 5     | 80.6     | 4    | 10.5    |
| Intron 5 | NM_002087.2:c.463_598del:p.(Ala155Trpfs*56)   | p.A155WfsX56             | <b>A155fs</b>                  | 3       | 2          | 3     | 64.7     | 1     | 60.0     | 1    | 5.0     |
| Exon 6   | NM_002087.2:c.468_474del:p.(Cys157Lysfs*97)   | p.C157KfsX97             | <b>C157fs</b>                  | 30      | 10         | 22    | 58.4     | 14    | 68.2     | 6    | 5.5     |
| Exon 6   | NM_002087.2:c.481_482del:p.(Arg161Glyfs*36)   | p.R161GfsX36             | <b>R161fs</b>                  | 1       | 1          | 1     | 48.0     | 0     |          | 0    |         |
| Exon 6   | NM_002087.2:c.559del:p.(Leu187Trpfs*69)       | p.L187WfsX69             | <b>L187fs (559del)</b>         | 0       |            | 0     |          | 0     |          | 0    |         |
| Exon 5   | NM_002087.2:c.559dup:p.(Leu187Profs*11)       | p.L187PfsX11             | <b>L187fs (559dup)</b>         | 3       | 1          | 3     | 52.3     | 3     | 60.3     | 3    | 8.0     |
| Exon 6   | NM_002087.2:c.592_593del:p.(Arg198Glyfs*19)   | p.R198GfsX19             | <b>R198fs</b>                  | 2       | 2          | 2     | 60.5     | 0     |          | 0    |         |
| Exon 6   | NM_002087.2:c.596C>T:p.(Ala199Val)            | p.A199V                  | <b>A199V</b>                   | 11      | 3          | 6     | 60.5     | 7     | 63.6     | 2    | 8.0     |
| Exon 7   | NM_002087.2:c.603dup:p.(Ser203Valfs*15)       | p.S203VfsX15             | <b>S203fs (603_604insC)</b>    | 3       | 3          | 2     | 49.0     | 3     | 62.0     | 2    | 6.5     |
| Exon 7   | NM_002087.2:c.607del:p.(Ser203Profs*53)       | p.S203PfsX53             | <b>S203fs (607delT)</b>        | 1       | 1          | 1     | 58.0     | 0     |          | 0    |         |
| Exon 7   | NM_002087.2:c.675_676del:p.(Ser226Trpfs*28)   | p.S226WfsX28             | <b>S226fs</b>                  | 6       | 6          | 6     | 56.8     | 6     | 62.3     | 6    | 5.6     |
| Exon 7   | NM_002087.2:c.687T>A:p.(Tyr229*)              | p.Y229X                  | <b>Y229X</b>                   | 5       | 1          | 3     | 62.7     | 5     | 69.2     | 3    | 8.7     |
| Intron 7 | NM_002087.2:c.708+1G>A                        |                          | <b>IVS7+1G&gt;A</b>            | 14      | 7          | 10    | 59.9     | 9     | 68.6     | 5    | 7.3     |
| Intron 7 | NM_002087.2:c.708+1G>C                        |                          | <b>IVS7+1G&gt;C</b>            | 1       | 1          | 1     | 55.0     | 1     | 61.0     | 1    | 6.0     |
| Intron 7 | NM_002087.2:c.708+5_8delGTGA                  |                          | <b>IVS7+5_8delGTGA</b>         | 8       | 4          | 6     | 62.2     | 6     | 72.3     | 4    | 10.0    |
| Intron 7 | NM_002087.2:c.708+6_9delTGAG                  |                          | <b>IVS7+6_9delTGAG</b>         | 17      | 9          | 12    | 60.9     | 15    | 70.7     | 10   | 5.0     |
| Intron 7 | NM_002087.2:c.709-2A>G                        |                          | <b>IVS7-2A&gt;G</b>            | 10      | 5          | 8     | 56.0     | 6     | 63.2     | 6    | 5.8     |
| Intron 7 | NM_002087.2:c.709-2A>T                        |                          | <b>IVS7-2A&gt;T</b>            | 12      | 1          | 12    | 67.0     | 8     | 74.6     | 8    | 6.0     |
| Intron 7 | NM_002087.2:c.709-1G>A                        |                          | <b>IVS7-1G&gt;A</b>            | 50      | 18         | 38    | 60.5     | 26    | 67.0     | 23   | 6.5     |
| Exon 8   | NM_002087.2:c.745C>T:p.(Gln249*)              | p.Q249X                  | <b>Q249X</b>                   | 6       | 1          | 6     | 60.5     | 6     | 66.5     | 6    | 6.0     |
| Exon 8   | NM_002087.2:c.759_760del:p.(Cys253*)          | p.C253X                  | <b>C253X</b>                   | 5       | 4          | 5     | 58.6     | 3     | 62.0     | 3    | 6.3     |
| Exon 8   | NM_002087.2:c.759_760dup:p.(Asp254Valfs*3)    | p.D254VfsX3              | <b>D254fs</b>                  | 3       | 1          | 3     | 57.7     | 1     | 82.0     | 1    | 22.0    |
| Exon 8   | NM_002087.2:c.761_762insTG:p.(Leu255Alafs*2)  | p.L255AfsX2              | <b>L255fs</b>                  | 3       | 1          | 3     | 62.0     | 3     | 70.0     | 3    | 8.0     |
| Exon 8   | NM_002087.2:c.768_769dup:p.(Gln257Profs*27)   | p.Q257PfsX27             | <b>Q257fs</b>                  | 16      | 6          | 16    | 61.3     | 7     | 69.0     | 7    | 8.8     |
| Exon 8   | NM_002087.2:c.775A>T:p.(Lys259*)              | p.K259X                  | <b>K259X</b>                   | 4       | 2          | 3     | 62.3     | 1     | 90.0     | 0    |         |
| Exon 8   | NM_002087.2:c.813_816del:p.(Thr272Serfs*10)   | p.T272SfsX10             | <b>T272fs</b>                  | 201     | 95         | 154   | 62.7     | 71    | 71.1     | 59   | 7.0     |
| Intron 8 | NM_002087.2:c.709_835del:p.(Ala237Trpfs*4)    | p.A237WfsX4              | <b>A237fs</b>                  | 33      | 4          | 32    | 61.0     | 25    | 69.0     | 24   | 9.2     |
| Intron 8 | NM_002087.2:c.833_834del:p.(Thr278Serfs*7)    | p.T278SfsX7              | <b>T278fs</b>                  | 6       | 1          | 6     | 60.5     | 4     | 74.3     | 4    | 8.0     |
| Intron 8 | NM_002087.2:c.836-1G>C                        |                          | <b>IVS8-1G&gt;C</b>            | 7       | 4          | 7     | 63.1     | 1     | 69.0     | 1    | 4.0     |
| Intron 8 | NM_002087.2:c.836-1G>T                        |                          | <b>IVS8-1G&gt;T</b>            | 2       | 1          | 2     | 69.5     | 0     |          | 0    |         |
| Exon 9   | NM_002087.2:c.848_854dup:p.(Asp285Glyfs*3)    | p.D285EfsX3              | <b>D285fs</b>                  | 1       | 1          | 1     | 53.0     | 0     |          | 0    |         |
| Exon 9   | NM_002087.2:c.882T>G:p.(Tyr294*)              | p.Y294X                  | <b>Y294X</b>                   | 9       | 3          | 4     | 59.0     | 3     | 67.0     | 3    | 5.7     |
| Exon 9   | NM_002087.2:c.898C>T:p.(Gln300*)              | p.Q300X                  | <b>Q300X</b>                   | 18      | 8          | 16    | 61.6     | 9     | 63.3     | 8    | 6.5     |
| Exon 9   | NM_002087.2:c.900_901dup:p.(Ser301Cysfs*61)   | p.S301CfsX61             | <b>S301fs</b>                  | 22      | 9          | 20    | 59.5     | 13    | 71.5     | 11   | 5.1     |
| Exon 9   | NM_002087.2:c.903_904insTG:p.(Gly302Trpfs*60) | p.G302WfsX60             | <b>G302fs</b>                  | 0       |            | 0     |          | 0     |          | 0    |         |
| Exon 9   | NM_002087.2:c.907dup:p.(Ala303Glyfs*14)       | p.A303GfsX14             | <b>A303fs (907_908insG)</b>    | 2       | 2          | 1     | 53.0     | 0     |          | 0    |         |
| Exon 9   | NM_002087.2:c.907del:p.(Ala303Profs*58)       | p.A303PfsX58             | <b>A303fs (907delG)</b>        | 1       | 1          | 1     | 63.0     | 0     |          | 0    |         |
| Exon 9   | NM_002087.2:c.909del:p.(Trp304Glyfs*57)       | p.W304GfsX57             | <b>W304fs (909delC)</b>        | 4       | 4          | 4     | 56.3     | 3     | 64.7     | 3    | 6.0     |
| Exon 9   | NM_002087.2:c.910_911insTG:p.(Trp304Leufs*58) | p.W304LfsX58             | <b>W304fs (910_911insTG)</b>   | 19      | 4          | 9     | 61.1     | 15    | 70.7     | 8    | 7.3     |
| Exon 9   | NM_002087.2:c.911IG>A:p.(Trp304*)             | p.W304X                  | <b>W304X</b>                   | 9       | 8          | 8     | 62.8     | 4     | 69.0     | 3    | 7.7     |
| Intron 9 | NM_002087.2:c.933+1del                        |                          | <b>IVS9+1delG</b>              | 5       | 1          | 5     | 58.8     | 0     |          | 0    |         |
| Intron 9 | NM_002087.2:c.933+1G>A                        |                          | <b>IVS9+1G&gt;A</b>            | 8       | 4          | 8     | 61.0     | 3     | 64.0     | 3    | 5.0     |
| Exon 10  | NM_002087.2:c.942C>A:p.(Cys314*)              | p.C314X                  | <b>C314X</b>                   | 6       | 4          | 4     | 72.8     | 3     | 78.3     | 2    | 4.0     |
| Exon 10  | NM_002087.2:c.975del:p.(Phe326Leufs*35)       | p.F326LfsX35             | <b>F326fs</b>                  | 0       |            | 0     |          | 0     |          | 0    |         |



| GRN       | Mutation                                          | Predicted protein change | Mutation alias                | N total | N families | N AAO | Mean AAO | N AAD | Mean AAD | N DD | Mean DD |
|-----------|---------------------------------------------------|--------------------------|-------------------------------|---------|------------|-------|----------|-------|----------|------|---------|
| Exon 10   | NM_002087.2:c.988_989del:p.(Thr330Alafs*6)        | p.T330AfsX6              | <b>T330fs</b>                 | 1       | 1          | 1     | 62.0     | 0     |          | 0    |         |
| Exon 10   | NM_002087.2:c.988_989dup:p.(Gln331Argfs*31)       | p.Q331RfsX31             | <b>Q331fs</b>                 | 4       | 4          | 2     | 63.5     | 2     | 61.0     | 0    |         |
| Exon 10   | NM_002087.2:c.998del:p.(Gly333Valfs*28)           | p.G333VfsX28             | <b>G333fs</b>                 | 3       | 2          | 3     | 63.7     | 3     | 70.3     | 3    | 6.7     |
| Exon 10   | NM_002087.2:c.1009C>T:p.(Gln337*)                 | p.Q337X                  | <b>Q337X</b>                  | 2       | 2          | 2     | 60.5     | 1     | 69.0     | 1    | 10.0    |
| Exon 10   | NM_002087.2:c.1013_1024del:p.(Gly338_Gln341del)   | p.Q337_340del            | <b>Q337_340del</b>            | 1       | 1          | 1     | 69.0     | 0     |          | 0    |         |
| Exon 10   | NM_002087.2:c.1012_1013delinsC:p.(Gly338Argfs*23) | p.G338RfsX23             | <b>G338fs</b>                 | 1       | 1          | 1     | 54.0     | 0     |          | 0    |         |
| Exon 10   | NM_002087.2:c.1014del:p.(His340Thrfs*21)          | p.H340TfsX21             | <b>H340fs</b>                 | 2       | 2          | 1     | 54.0     | 0     |          | 0    |         |
| Exon 10   | NM_002087.2:c.1021C>T:p.(Gln341*)                 | p.Q341X                  | <b>Q341X</b>                  | 7       | 4          | 7     | 66.4     | 2     | 88.0     | 2    | 10.5    |
| Exon 10   | NM_002087.2:c.1048dup:p.(Ala350Glyfs*18)          | p.A350GfsX18             | <b>A350fs</b>                 | 5       | 1          | 2     | 58.0     | 4     | 66.0     | 1    | 3.0     |
| Exon 10   | NM_002087.2:c.1070del:p.(Pro357Hisfs*4)           | p.P357HfsX4              | <b>P357fs</b>                 | 1       | 1          | 1     | 44.0     | 1     | 51.0     | 1    | 7.0     |
| Exon 10   | NM_002087.2:c.1072C>T:p.(Gln358*)                 | p.Q358X                  | <b>Q358X</b>                  | 0       |            | 0     |          | 0     |          | 0    |         |
| Exon 10   | NM_002087.2:c.1095_1096del:p.(Cys366*)            | p.C366fsX1               | <b>C366fs</b>                 | 13      | 6          | 13    | 61.2     | 4     | 77.8     | 4    | 8.5     |
| Exon 10   | NM_002087.2:c.1117C>T:p.(Pro373Ser)               | p.P373S                  | <b>P373S</b>                  | 4       | 1          | 4     | 59.8     | 2     | 69.5     | 2    | 4.5     |
| Exon 10   | NM_002087.2:c.1144dup:p.(Thr382Asnfs*32)          | p.T382NfsX32             | <b>T382fs (I144_I145insA)</b> | 1       | 1          | 1     | 62.0     | 0     |          | 0    |         |
| Exon 10   | NM_002087.2:c.1145del:p.(Thr382Serfs*30)          | p.T382SfsX30             | <b>T382fs (I145delC)</b>      | 9       | 3          | 7     | 54.9     | 5     | 59.8     | 5    | 6.0     |
| Exon 10   | NM_002087.2:c.1157G>A:p.(Trp386*)                 | p.W386X                  | <b>W386X</b>                  | 11      | 4          | 10    | 64.2     | 7     | 74.3     | 6    | 5.5     |
| Intron 10 | NM_002087.2:c.1179del:p.(Ala394Leufs*18)          | p.A394LfsX18             | <b>A394fs</b>                 | 1       | 1          | 1     | 51.0     | 0     |          | 0    |         |
| Intron 10 | NM_002087.2:c.1179+2T>C                           |                          | <b>IVS10+2T&gt;C</b>          | 2       | 1          | 1     | 59.0     | 1     | 63.0     | 1    | 4.0     |
| Intron 10 | NM_002087.2:c.1179+3A>G                           |                          | <b>IVS10+3A&gt;G</b>          | 3       | 1          | 3     | 60.7     | 1     | 64.0     | 1    | 9.0     |
| Exon 11   | NM_002087.2:c.1196_1197del:p.(D399Afs*14)         | p.D399AfsX14             | <b>D399fs</b>                 | 2       | 1          | 1     | 60.0     | 1     | 60.0     | 0    |         |
| Exon 11   | NM_002087.2:c.1201C>T:p.(Gln401*)                 | p.Q401X                  | <b>Q401X</b>                  | 5       | 3          | 5     | 58.2     | 1     | 63.0     | 1    | 7.0     |
| Exon 11   | NM_002087.2:c.1212C>A:p.(Cys404*)                 | p.C404X                  | <b>C404X</b>                  | 1       | 1          | 1     | 58.0     | 1     | 66.0     | 1    | 8.0     |
| Exon 11   | NM_002087.2:c.1231_1232del:p.(Val411Serfs*2)      | p.V411SfsX2              | <b>V411fs</b>                 | 2       | 1          | 1     | 66.0     | 2     | 72.5     | 1    | 4.0     |
| Exon 11   | NM_002087.2:c.1231_1232dup:p.(Ala412*)            | p.A412X                  | <b>A412X</b>                  | 1       | 1          | 1     | 61.0     | 1     | 68.0     | 1    | 7.0     |
| Exon 11   | NM_002087.2:c.1243C>T:p.(Gln415*)                 | p.Q415X                  | <b>Q415X</b>                  | 6       | 6          | 6     | 58.2     | 0     |          | 0    |         |
| Exon 11   | NM_002087.2:c.1246dup:p.(Cys416Leufs*30)          | p.C416LfsX30             | <b>C416fs</b>                 | 11      | 1          | 9     | 64.4     | 9     | 72.1     | 8    | 7.5     |
| Exon 11   | NM_002087.2:c.1252C>T:p.(Arg418*)                 | p.R418X                  | <b>R418X</b>                  | 20      | 8          | 13    | 56.9     | 14    | 65.5     | 11   | 8.7     |
| Exon 11   | NM_002087.2:c.1256_1263dup:p.(Ile422Glyfs*72)     | p.I422EfsX72             | <b>I422fs</b>                 | 6       | 1          | 5     | 61.0     | 3     | 70.0     | 2    | 6.5     |
| Exon 11   | NM_002087.2:c.1317_1318del:p.(Asp441Hisfs*4)      | p.D441HfsX4              | <b>D441fs</b>                 | 11      | 4          | 8     | 57.4     | 7     | 62.1     | 5    | 5.0     |
| Exon 11   | NM_002087.2:c.1354del:p.(Val452Trpfs*39)          | p.V452WfsX39             | <b>V452fs</b>                 | 9       | 4          | 6     | 60.0     | 5     | 70.2     | 5    | 10.8    |
| Exon 11   | NM_002087.2:c.1395dup:p.(Cys466Leufs*46)          | p.C466LfsX46             | <b>C466fs</b>                 | 4       | 2          | 3     | 57.0     | 3     | 61.3     | 3    | 4.3     |
| Exon 11   | NM_002087.2:c.1402C>T:p.(Gln468*)                 | p.Q468X                  | <b>Q468X</b>                  | 3       | 2          | 2     | 59.5     | 1     | 66.0     | 1    | 6.0     |
| Intron 11 | NM_002087.2:c.1415_1645del:p.(Ala472_Gln548del)   | p.A472_Q548del           | <b>A472_Q548del</b>           | 2       | 2          | 2     | 50.0     | 0     |          | 0    |         |
| Exon 12   | NM_002087.2:c.1414_1644del:p.(Ala472Valfs*10)     | p.A472VfsX10             | <b>A472fs</b>                 | 4       | 3          | 3     | 65.0     | 2     | 74.0     | 2    | 8.5     |
| Exon 12   | NM_002087.2:c.1420_1421del:p.(Cys474Leufs*37)     | p.C474LfsX37             | <b>C474fs</b>                 | 0       |            | 0     |          | 0     |          | 0    |         |
| Exon 12   | NM_002087.2:c.1428_1431del:p.(Glu476Aspfs*14)     | p.E476DfsX14             | <b>E476fs</b>                 | 2       | 1          | 2     | 62.0     | 2     | 74.0     | 2    | 12.0    |
| Exon 12   | NM_002087.2:c.1446C>A:p.(Cys482*)                 | p.C482X                  | <b>C482X</b>                  | 5       | 1          | 4     | 55.8     | 3     | 70.7     | 3    | 17.3    |
| Exon 12   | NM_002087.2:c.1477C>T:p.(Arg493*)                 | p.R493X                  | <b>R493X</b>                  | 55      | 22         | 40    | 60.2     | 42    | 67.5     | 30   | 6.3     |
| Exon 12   | NM_002087.2:c.1494_1498del:p.(Glu498Aspfs*12)     | p.E498DfsX12             | <b>E498fs</b>                 | 8       | 5          | 8     | 57.6     | 0     |          | 0    |         |
| Exon 12   | NM_002087.2:c.1507C>T:p.(Gln503*)                 | p.Q503X                  | <b>Q503X</b>                  | 1       | 1          | 1     | 75.0     | 0     |          | 0    |         |
| Exon 12   | NM_002087.2:c.1603C>T:p.(Arg535*)                 | p.R535X                  | <b>R535X</b>                  | 1       | 1          | 1     | 72.0     | 0     |          | 0    |         |
| Exon 12   | NM_002087.2:c.1612C>T:p.(Arg538*)                 | p.R538X                  | <b>R538X</b>                  | 0       |            | 0     |          | 0     |          | 0    |         |

| <i>MAPT</i> | Mutation                                       | Predicted protein change  | Mutation alias        | N total | N families | N AAO | Mean AAO | N AAD | Mean AAD | N DD | Mean DD |
|-------------|------------------------------------------------|---------------------------|-----------------------|---------|------------|-------|----------|-------|----------|------|---------|
| Exon 1      | NM_001123066.3:c.14G>A;p.(Arg5His)             | p.R5H (p.R5H)             | <b>R5H</b>            | 3       | 2          | 3     | 59.3     | 3     | 78.0     | 3    | 18.7    |
| Exon 1      | NM_001123066.3:c.14G>T;p.(Arg5Leu)             | p.R5L (p.R5L)             | <b>R5L</b>            | 1       | 1          | 1     | 62.0     | 1     | 67.0     | 1    | 5.0     |
| Exon 2      | NM_001123066.3:c.163G>A;p.(Gly55Arg)           | p.G55R (p.G55R)           | <b>G55R</b>           | 2       | 1          | 2     | 61.0     | 1     | 76.0     | 1    | 6.0     |
| Exon 9      | NM_001123066.3:c.1775A>C;p.(Lys592Thr)         | p.K257T (p.K592T)         | <b>K257T</b>          | 5       | 3          | 4     | 46.3     | 3     | 54.0     | 3    | 6.3     |
| Exon 9      | NM_001123066.3:c.1783A>G;p.(Ile595Val)         | p.I260V (p.I595V)         | <b>I260V</b>          | 1       | 1          | 1     | 68.0     | 1     | 77.0     | 1    | 9.0     |
| Exon 9      | NM_001123066.3:c.1801C>G;p.(Leu601Val)         | p.L266V (p.L601V)         | <b>L266V</b>          | 8       | 4          | 7     | 32.4     | 6     | 36.2     | 6    | 4.7     |
| Exon 9      | NM_001123066.3:c.1816G>C;p.(Gly606Arg)         | p.G271R (p.G606R)         | <b>G271R</b>          | 1       | 1          | 1     | 50.0     | 0     |          | 0    |         |
| Exon 9      | NM_001123066.3:c.1820G>T;p.(Gly607Val)         | p.G272V (p.G607V)         | <b>G272V</b>          | 10      | 1          | 7     | 44.4     | 5     | 55.4     | 5    | 10.8    |
| Exon 9      | NM_001123066.3:c.1822G>A;p.(Gly608Arg)         | p.G273R (p.G608R)         | <b>G273R</b>          | 1       | 1          | 1     | 63.0     | 0     |          | 0    |         |
| Intron 9    | NM_001123066.3:c.1828-15T>C                    |                           | <b>IVS9-15T&gt;C</b>  | 1       | 1          | 1     | 46.0     | 1     | 57.0     | 1    | 11.0    |
| Intron 9    | NM_001123066.3:c.1828-11G>C                    |                           | <b>IVS9-11G&gt;C</b>  | 5       | 1          | 2     | 58.5     | 5     | 66.0     | 2    | 8.0     |
| Intron 9    | NM_001123066.3:c.1828-10G>C                    |                           | <b>IVS9-10G&gt;C</b>  | 3       | 1          | 1     | 50.0     | 3     | 59.7     | 1    | 13.0    |
| Intron 9    | NM_001123066.3:c.1828-10G>T                    |                           | <b>IVS9-10G&gt;T</b>  | 12      | 2          | 11    | 46.1     | 8     | 53.5     | 7    | 5.9     |
| Exon 10     | NM_001123066.3:c.1842T>G;p.(Asn614Lys)         | p.N279K (p.N614K)         | <b>N279K</b>          | 44      | 17         | 36    | 43.8     | 38    | 52.4     | 31   | 6.5     |
| Exon 10     | NM_001123066.3:c.1846_1848delAAG;p.(Lys616del) | p.deltaK280 (p.deltaK616) | <b>deltaK280</b>      | 4       | 4          | 4     | 57.0     | 3     | 66.3     | 3    | 8.0     |
| Exon 10     | NM_001123066.3:c.1857T>C;p.(=)                 | p.L284 (p.L619)           | <b>L284L</b>          | 7       | 2          | 7     | 51.7     | 6     | 62.0     | 6    | 9.6     |
| Exon 10     | NM_001123066.3:c.1856T>G;p.(Leu619Arg)         | p.L284R (p.L619R)         | <b>L284R</b>          | 3       | 1          | 3     | 42.3     | 3     | 49.0     | 3    | 6.7     |
| Exon 10     | NM_001123066.3:c.1858A>C;p.(Ser620Arg)         | p.S285R (p.S620R)         | <b>S285R</b>          | 1       | 1          | 1     | 46.0     | 1     | 49.0     | 1    | 3.0     |
| Exon 10     | NM_001123066.3:c.1876T>C;p.(Cys626Arg)         | p.C291R (p.C626R)         | <b>C291R</b>          | 2       | 1          | 2     | 53.5     | 1     | 67.0     | 1    | 7.0     |
| Exon 10     | NM_001123066.3:c.1891A>C;p.(Asn631His)         | p.N296H (p.N631H)         | <b>N296H</b>          | 4       | 1          | 1     | 57.0     | 4     | 65.8     | 1    | 5.0     |
| Exon 10     | NM_001123066.3:c.1892_1894delATA;p.(Asn631del) | p.N296del (p.N631del)     | <b>delN296</b>        | 5       | 4          | 5     | 49.2     | 1     | 42.0     | 1    | 3.0     |
| Exon 10     | NM_001123066.3:c.1893T>C;p.(=)                 | p.N296 (p.N631)           | <b>N296N</b>          | 6       | 3          | 3     | 49.3     | 3     | 64.3     | 1    | 10.0    |
| Exon 10     | NM_001123066.3:c.1897A>G;p.(Lys633Glu)         | p.K298E (p.K633E)         | <b>K298E</b>          | 2       | 1          | 2     | 62.5     | 2     | 67.5     | 2    | 5.0     |
| Exon 10     | NM_001123066.3:c.1906C>A;p.(Pro636Thr)         | p.P301T (p.P636T)         | <b>P301T</b>          | 5       | 1          | 5     | 49.8     | 4     | 52.3     | 4    | 3.8     |
| Exon 10     | NM_001123066.3:c.1906C>T;p.(Pro636Ser)         | p.P301S (p.P636S)         | <b>P301S</b>          | 20      | 5          | 15    | 34.3     | 10    | 40.8     | 7    | 5.0     |
| Exon 10     | NM_001123066.3:c.1907C>T;p.(Pro636Leu)         | p.P301L (p.P636L)         | <b>P301L</b>          | 234     | 59         | 174   | 53.0     | 139   | 60.3     | 111  | 8.2     |
| Exon 10     | NM_001123066.3:c.1913G>T;p.(Gly638Val)         | p.G303V (p.G638V)         | <b>G303V</b>          | 6       | 2          | 6     | 38.5     | 5     | 43.4     | 5    | 4.6     |
| Exon 10     | NM_001123066.3:c.1915G>A;p.(Gly639Ser)         | p.G304S (p.G639S)         | <b>G304S</b>          | 2       | 1          | 2     | 67.5     | 1     | 87.0     | 1    | 17.0    |
| Exon 10     | NM_001123066.3:c.1919G>A;p.(Ser640Asn)         | p.S305N (p.S640N)         | <b>S305N</b>          | 14      | 5          | 13    | 48.1     | 4     | 54.8     | 4    | 9.3     |
| Exon 10     | NM_001123066.3:c.1919G>T;p.(Ser640Ile)         | p.S305I (p.S640I)         | <b>S305I</b>          | 3       | 2          | 3     | 41.0     | 2     | 47.0     | 2    | 3.5     |
| Exon 10     | NM_001123066.3:c.1920T>C;p.(=)                 | p.S305 (p.S640)           | <b>S305S</b>          | 9       | 6          | 8     | 48.5     | 6     | 55.2     | 6    | 4.0     |
| Intron 10   | NM_001123066.3:c.1920+3G>A                     |                           | <b>IVS10+3G&gt;A</b>  | 13      | 4          | 8     | 46.3     | 6     | 50.3     | 5    | 12.5    |
| Intron 10   | NM_001123066.3:c.1920+4A>C                     |                           | <b>IVS10+4A&gt;C</b>  | 1       | 1          | 1     | 46.0     | 1     | 57.0     | 1    | 11.0    |
| Intron 10   | NM_001123066.3:c.1920+11T>C                    |                           | <b>IVS10+11T&gt;C</b> | 2       | 2          | 2     | 52.0     | 2     | 59.5     | 2    | 6.0     |
| Intron 10   | NM_001123066.3:c.1920+12C>T                    |                           | <b>IVS10+12C&gt;T</b> | 1       | 1          | 1     | 56.0     | 1     | 65.0     | 1    | 8.0     |
| Intron 10   | NM_001123066.3:c.1920+12C>A                    |                           | <b>IVS10+12C&gt;A</b> | 2       | 1          | 1     | 48.0     | 2     | 54.0     | 1    | 9.0     |
| Intron 10   | NM_001123066.3:c.1920+13A>G                    |                           | <b>IVS10+13A&gt;G</b> | 2       | 1          | 1     | 64.0     | 2     | 69.0     | 1    | 6.0     |
| Intron 10   | NM_001123066.3:c.1920+14C>T                    |                           | <b>IVS10+14C&gt;T</b> | 19      | 2          | 17    | 44.6     | 13    | 55.6     | 12   | 11.8    |
| Intron 10   | NM_001123066.3:c.1920+15A>C                    |                           | <b>IVS10+15A&gt;C</b> | 6       | 1          | 6     | 47.7     | 3     | 57.3     | 3    | 7.7     |
| Intron 10   | NM_001123066.3:c.1920+16C>T                    |                           | <b>IVS10+16C&gt;T</b> | 149     | 48         | 105   | 50.9     | 94    | 60.8     | 66   | 10.5    |
| Intron 10   | NM_001123066.3:c.1920+19C>G                    |                           | <b>IVS10+19C&gt;G</b> | 1       | 1          | 1     | 52.0     | 0     |          | 0    |         |
| Exon 11     | NM_001123066.3:c.1949T>G;p.(Leu650Arg)         | p.L315R (p.L650R)         | <b>L315R</b>          | 7       | 1          | 7     | 53.6     | 7     | 59.1     | 7    | 5.6     |
| Exon 11     | NM_001123066.3:c.1950G>A;p.(=)                 | p.L315 (p.L650)           | <b>L315L</b>          | 8       | 2          | 8     | 50.9     | 3     | 52.3     | 3    | 6.0     |
| Exon 11     | NM_001123066.3:c.1955A>T;p.(Lys652Met)         | p.K317M (p.K652M)         | <b>K317M</b>          | 11      | 1          | 11    | 47.0     | 9     | 51.9     | 9    | 5.6     |
| Exon 11     | NM_001123066.3:c.1964C>T;p.(Ser655Phe)         | p.S320F (p.S655F)         | <b>S320F</b>          | 3       | 2          | 2     | 47.0     | 2     | 57.0     | 2    | 10.0    |
| Exon 11     | NM_001123066.3:c.1999C>T;p.(Pro667Ser)         | p.P332S (p.P667S)         | <b>P332S</b>          | 3       | 1          | 3     | 53.0     | 1     | 85.0     | 1    | 25.0    |
| Exon 12     | NM_001123066.3:c.2008G>A;p.(Gly670Ser)         | p.G335S (p.G670S)         | <b>G335S</b>          | 1       | 1          | 1     | 22.0     | 1     | 36.0     | 1    | 14.0    |

| <i>MAPT</i> | Mutation                               | Predicted protein change | Mutation alias            | N total | N families | N AAO | Mean AAO | N AAD | Mean AAD | N DD | Mean DD |
|-------------|----------------------------------------|--------------------------|---------------------------|---------|------------|-------|----------|-------|----------|------|---------|
| Exon 12     | NM_001123066.3:c.2009G>T;p.(Gly670Val) | p.G335V (p.G670V)        | <b>G335V</b>              | 6       | 1          | 5     | 25.4     | 4     | 36.5     | 3    | 10.0    |
| Exon 12     | NM_001123066.3:c.2012A>G;p.(Gln671Arg) | p.Q336R (p.Q671R)        | <b>Q336R</b>              | 3       | 2          | 2     | 60.0     | 1     | 39.0     | 0    |         |
| Exon 12     | NM_001123066.3:c.2013G>C;p.(Gln671His) | p.Q336H (p.Q671H)        | <b>Q336H</b>              | 5       | 3          | 4     | 61.8     | 4     | 72.8     | 4    | 12.0    |
| Exon 12     | NM_001123066.3:c.2014G>A;p.(Val672Met) | p.V337M (p.V672M)        | <b>V337M</b>              | 20      | 6          | 17    | 48.2     | 10    | 71.5     | 10   | 14.2    |
| Exon 12     | NM_001123066.3:c.2030A>T;p.(Glu677Val) | p.E342V (p.E677V)        | <b>E342V</b>              | 2       | 1          | 2     | 43.5     | 2     | 55.0     | 2    | 11.5    |
| Exon 12     | NM_001123066.3:c.2057A>G;p.(Gln686Arg) | p.Q351R (p.Q686R)        | <b>Q351R</b>              | 2       | 1          | 2     | 51.5     | 0     |          | 0    |         |
| Exon 12     | NM_001123066.3:c.2060C>T;p.(Ser687Leu) | p.S352L (p.S687L)        | <b>S352L</b>              | 2       | 1          | 2     | 29.5     | 2     | 31.5     | 2    | 2.0     |
| Exon 12     | NM_001123066.3:c.2071T>A;p.(Ser691Thr) | p.S356T (p.S691T)        | <b>S356T</b>              | 3       | 2          | 3     | 30.3     | 1     | 42.0     | 1    | 15.0    |
| Exon 12     | NM_001123066.3:c.2092G>A;p.(Val698Ile) | p.V363I (p.V698I)        | <b>V363I</b>              | 4       | 3          | 4     | 61.5     | 1     | 80.0     | 1    | 5.0     |
| Exon 12     | NM_001123066.3:c.2093T>C;p.(Val698Ala) | p.V363A (p.V698A)        | <b>V363A</b>              | 3       | 1          | 3     | 58.0     | 1     | 67.0     | 1    | 2.0     |
| Exon 12     | NM_001123066.3:c.2095C>T;p.(Pro699Ser) | p.P364S (p.P699S)        | <b>P364S</b>              | 3       | 2          | 2     | 52.5     | 2     | 57.5     | 1    | 2.0     |
| Exon 12     | NM_001123066.3:c.2101G>A;p.(Gly701Arg) | p.G366R (p.G701R)        | <b>G366R</b>              | 2       | 1          | 2     | 49.5     | 1     | 55.0     | 1    | 8.0     |
| Exon 12     | NM_001123066.3:c.2111A>T;p.(Lys704Ile) | p.K369I (p.K704I)        | <b>K369I</b>              | 1       | 1          | 1     | 50.0     | 1     | 61.0     | 1    | 11.0    |
| Exon 13     | NM_001123066.3:c.2120A>G;p.(Glu707Gly) | p.E372G (p.E707G)        | <b>E372G</b>              | 1       | 1          | 1     | 40.0     | 1     | 58.0     | 1    | 18.0    |
| Exon 13     | NM_001123066.3:c.2170G>A;p.(Gly724Arg) | p.G389R (p.G724R)        | <b>G389R (2170G&gt;A)</b> | 6       | 5          | 5     | 29.0     | 2     | 30.5     | 2    | 4.0     |
| Exon 13     | NM_001123066.3:c.2170G>C;p.(Gly724Arg) | p.G389R (p.G724R)        | <b>G389R (2170G&gt;C)</b> | 6       | 6          | 6     | 30.8     | 5     | 35.0     | 5    | 5.8     |
| Exon 13     | NM_001123066.3:c.2221C>T;p.(Arg741Trp) | p.R406W (p.R741W)        | <b>R406W</b>              | 67      | 9          | 39    | 55.4     | 28    | 70.9     | 21   | 16.9    |
| Exon 13     | NM_001123066.3:c.2233A>C;p.(Asn745His) | p.N410H (p.N745H)        | <b>N410H</b>              | 1       | 1          | 1     | 53.0     | 1     | 67.0     | 1    | 14.0    |
| Exon 13     | NM_001123066.3:c.2275C>A;p.(Gln759Lys) | p.Q424K (p.Q759K)        | <b>Q424K</b>              | 0       |            | 0     |          | 0     |          | 0    |         |
| Exon 13     | NM_001123066.3:c.2285C>T;p.(Thr762Met) | p.T427M (p.T762M)        | <b>T427M</b>              | 1       | 1          | 1     | 56.0     | 1     | 65.0     | 1    | 9.0     |

Data from published studies was included if individual-level data was available rather than group-level data only.

All mutations described in the literature are included here even when no individual clinical data was available for analysis within the study – these mutations are shown here by a 0 in the ‘N total’ column: 11 *GRN* mutations and 1 *MAPT* mutation.

Of note, data was included from both confirmed mutation carriers and from some family members who were assumed to be mutation carriers based on their clinical phenotype – this was the case for data from sites in the study as well as the data taken from publications. However, there is a potential that some untested family members could be phenocopies and not true mutation carriers.

Data on individual mutations is also affected by the extent to which families have been investigated – it is likely that some families have been studied in more detail than others which may affect the observed frequencies.

## References

1. Rohrer JD, Beck J, Plagnol V, Gordon E, Lashley T, Revesz T, Janssen JC, Fox NC, Warren JD, Rossor MN, Mead S, Schott JM. Exome sequencing reveals a novel partial deletion in the progranulin gene causing primary progressive aphasia. *J Neurol Neurosurg Psychiatry*. 2013;84(12):1411-2.
2. Clot F, Rovelet-Lecrux A, Lamari F, Noël S, Keren B, Camuzat A, Michon A, Jornea L, Laudier B, de Septenville A, Caroppo P, Campion D, Cazeneuve C, Brice A, LeGuern E, Le Ber I; French clinical and genetic research network on FTL/FTLD-ALS. Partial deletions of the GRN gene are a cause of frontotemporal lobar degeneration. *Neurogenetics*. 2014;15(2):95-100.
3. Chen-Plotkin AS, Martinez-Lage M, Sleiman PM, Hu W, Greene R, Wood EM, Bing S, Grossman M, Schellenberg GD, Hatanpaa KJ, Weiner MF, White CL 3rd, Brooks WS, Halliday GM, Kril JJ, Gearing M, Beach TG, Graff-Radford NR, Dickson DW, Rademakers R, Boeve BF, Pickering-Brown SM, Snowden J, van Swieten JC, Heutink P, Seelaar H, Murrell JR, Ghetti B, Spina S, Grafman J, Kaye JA, Woltjer RL, Mesulam M, Bigio E, Lladó A, Miller BL, Alzualde A, Moreno F, Rohrer JD, Mackenzie IR, Feldman HH, Hamilton RL, Cruts M, Engelborghs S, De Deyn PP, Van Broeckhoven C, Bird TD, Cairns NJ, Goate A, Frosch MP, Riederer PF, Bogdanovic N, Lee VM, Trojanowski JQ, Van Deerlin VM. Genetic and clinical features of progranulin-associated frontotemporal lobar degeneration. *Arch Neurol*. 2011;68(4):488-97.
4. Cioffi SM, Galimberti D, Barocco F, Spallazzi M, Fenoglio C, Serpente M, Arcaro M, Gardini S, Scarpini E, Caffarra P. Non Fluent Variant of Primary Progressive Aphasia Due to the Novel GRN g.9543delA(IVS3-2delA) Mutation. *J Alzheimers Dis*. 2016;54(2):717-21.
5. Dopfer EG, Seelaar H, Chiu WZ, de Koning I, van Minkelen R, Baker MC, Rozemuller AJ, Rademakers R, van Swieten JC. Symmetrical corticobasal syndrome caused by a novel C.314dup progranulin mutation. *J Mol Neurosci*. 2011;45(3):354-8.
6. Karch CM, Ezerskiy L, Redaelli V, Giovagnoli AR, Tiraboschi P, Pelliccioni G, Pelliccioni P, Kapetis D, D'Amato I, Piccoli E, Ferretti MG, Tagliavini F, Rossi G. Missense mutations in progranulin gene associated with frontotemporal lobar degeneration: study of pathogenetic features. *Neurobiol Aging*. 2016;38:215.e1-215.e12.
7. Calvi A, Cioffi SM, Caffarra P, Fenoglio C, Serpente M, Pietroboni AM, Arighi A, Ghezzi L, Gardini S, Scarpini E, Galimberti D. The novel GRN g.1159\_1160delTG mutation is associated with behavioral variant frontotemporal dementia. *J Alzheimers Dis*. 2015;44(1):277-82.
8. Gazzina S, Archetti S, Alberici A, Bonomi E, Cosseddu M, Di Lorenzo D, Padovani A, Borroni B. Frontotemporal Dementia due to the Novel GRN Arg161GlyfsX36 Mutation. *J Alzheimers Dis*. 2017;57(4):1185-1189.
9. Schofield EC, Halliday GM, Kwok J, Loy C, Double KL, Hodges JR. Low serum progranulin predicts the presence of mutations: a prospective study. *J Alzheimers Dis*. 2010;22(3):981-4.
10. Kuuluvainen L, Pöyhönen M, Pasanen P, Siitonen M, Rummukainen J, Tienari PJ, Paetau A, Myllykangas L. A Novel Loss-of-Function GRN Mutation p.(Tyr229\*): Clinical and Neuropathological Features. *J Alzheimers Dis*. 2017;55(3):1167-1174.
11. Skoglund L, Matsui T, Freeman SH, Wallin A, Blom ES, Frosch MP, Growdon JH, Hyman BT, Lannfelt L, Ingelsson M, Glaser A. Novel progranulin mutation detected in 2 patients with FTL. *Alzheimer Dis Assoc Disord*. 2011;25(2):173-8.
12. Marcon G, Rossi G, Giaccone G, Giovagnoli AR, Piccoli E, Zanini S, Geatti O, Toso V, Grisoli M, Tagliavini F. Variability of the clinical phenotype in an Italian family with dementia associated with an intronic deletion in the GRN gene. *J Alzheimers Dis*. 2011;26(3):583-90.
13. Bit-Ivan EN, Suh E, Shim HS, Weintraub S, Hyman BT, Arnold SE, McCarty-Wood E, Van Deerlin VM, Schneider JA, Trojanowski JQ, Frosch MP, Baker MC, Rademakers R, Mesulam M, Bigio EH. A novel GRN mutation (GRN c.708+6\_+9delTGAG) in frontotemporal

- lobar degeneration with TDP-43-positive inclusions: clinicopathologic report of 6 cases. *J Neuropathol Exp Neurol.* 2014;73(5):467-73.
14. Guven G, Lohmann E, Bras J, Gibbs JR, Gurvit H, Bilgic B, Hanagasi H, Rizzu P, Heutink P, Emre M, Erginel-Unaltuna N, Just W, Hardy J, Singleton A, Guerreiro R. Mutation Frequency of the Major Frontotemporal Dementia Genes, MAPT, GRN and C9ORF72 in a Turkish Cohort of Dementia Patients. *PLoS One.* 2016;11(9):e0162592.
  15. Sassi C, Capozzo R, Gibbs R, Crews C, Zecca C, Arcuti S, Copetti M, Barulli MR, Brescia V, Singleton AB, Logroscino G. A Novel Splice-Acceptor Site Mutation in GRN (c.709-2 A>T) Causes Frontotemporal Dementia Spectrum in a Large Family from Southern Italy. *J Alzheimers Dis.* 2016;53(2):475-85.
  16. Capozzo R, Sassi C, Hammer MB, Arcuti S, Zecca C, Barulli MR, Tortelli R, Gibbs JR, Crews C, Seripa D, Carnicella F, Dell'Aquila C, Rossi M, Tamma F, Valluzzi F, Brancasi B, Panza F, Singleton AB, Logroscino G. Clinical and genetic analyses of familial and sporadic frontotemporal dementia patients in Southern Italy. *Alzheimers Dement.* 2017;13(8):858-869.
  17. Rossi G, Piccoli E, Benussi L, Caso F, Redaelli V, Magnani G, Binetti G, Ghidoni R, Perani D, Giaccone G, Tagliavini F. A novel progranulin mutation causing frontotemporal lobar degeneration with heterogeneous phenotypic expression. *J Alzheimers Dis.* 2011;23(1):7-12.
  18. Antonell A, Gil S, Sánchez-Valle R, Balasa M, Bosch B, Prat MC, Chiollaz AC, Fernández M, Yagüe J, Molinuevo JL, Lladó A. Serum progranulin levels in patients with frontotemporal lobar degeneration and Alzheimer's disease: detection of GRN mutations in a Spanish cohort. *J Alzheimers Dis.* 2012;31(3):581-91.
  19. Ferrari R, Hardy J, Momeni P. Frontotemporal dementia: from Mendelian genetics towards genome wide association studies. *J Mol Neurosci.* 2011;45(3):500-15.
  20. Taipa R, Tuna A, Damásio J, Pinto PS, Cavaco S, Pereira S, Milterberger-Miltenyi G, Galimberti D, Melo-Pires M. Clinical, neuropathological, and genetic characteristics of the novel IVS9+1delG GRN mutation in a patient with frontotemporal dementia. *J Alzheimers Dis.* 2012;30(1):83-90.
  21. Taghdiri F, Sato C, Ghani M, Moreno D, Rogaeva E, Tartaglia MC. Novel GRN Mutations in Patients with Corticobasal Syndrome. *Sci Rep.* 2016;6:22913.
  22. Ogaki K, Li Y, Takanashi M, Ishikawa K, Kobayashi T, Nonaka T, Hasegawa M, Kishi M, Yoshino H, Funayama M, Tsukamoto T, Shioya K, Yokochi M, Imai H, Sasaki R, Kokubo Y, Kuzuhara S, Motoi Y, Tomiyama H, Hattori N. Analyses of the MAPT, PGRN, and C9orf72 mutations in Japanese patients with FTL, PSP, and CBS. *Parkinsonism Relat Disord.* 2013;19(1):15-20.
  23. Rohrer JD, Beck J, Warren JD, King A, Al Sarraj S, Holton J, Revesz T, Collinge J, Mead S. Corticobasal syndrome associated with a novel I048\_I049insG progranulin mutation. *Rohrer JD, Beck J, Warren JD, King A, Al Sarraj S, Holton J, Revesz T, Collinge J, Mead S. J Neurol Neurosurg Psychiatry.* 2009;80(11):1297-8.
  24. Wilke C, Gillardon F, Deuschle C, Hobert MA, Jansen IE, Metzger FG, Heutink P, Gasser T, Maetzler W, Blauwendraat C, Synofzik M. Cerebrospinal Fluid Progranulin, but Not Serum Progranulin, Is Reduced in GRN-Negative Frontotemporal Dementia. *Neurodegener Dis.* 2017;17(2-3):83-88.
  25. Almeida MR, Baldeiras I, Ribeiro MH, Santiago B, Machado C, Massano J, Guimarães J, Resende Oliveira C, Santana I. Progranulin peripheral levels as a screening tool for the identification of subjects with progranulin mutations in a Portuguese cohort. *Neurodegener Dis.* 2014;13(4):214-23.

26. Chiang HH, Forsell C, Lilius L, Öijerstedt L, Thordardottir S, Shanmugarajan K, Westerlund M, Nennesmo I, Thonberg H, Graff C. Novel progranulin mutations with reduced serum-progranulin levels in frontotemporal lobar degeneration. *Eur J Hum Genet.* 2013;21(11):1260-5.
27. Iyer A, Lapointe NE, Zielke K, Berdyski M, Guzman E, Barczak A, Chodakowska-Żebrowska M, Barcikowska M, Feinstein S, Zekanowski C. A novel MAPT mutation, G55R, in a frontotemporal dementia patient leads to altered Tau function. *PLoS One.* 2013;8(9):e76409.
28. Anfossi M, Vuono R, Maletta R, Virdee K, Mirabelli M, Colao R, Puccio G, Bernardi L, Frangipane F, Gallo M, Geracitano S, Tomaino C, Curcio SA, Zannino G, Lamenza F, Duyckaerts C, Spillantini MG, Losso MA, Bruni AC. Compound heterozygosity of 2 novel MAPT mutations in frontotemporal dementia. *Neurobiol Aging.* 2011;32(4):757.e1-757.e11.
29. Rohrer JD, Paviour D, Vandrovцова J, Hodges J, de Silva R, Rossor MN. Novel L284R MAPT mutation in a family with an autosomal dominant progressive supranuclear palsy syndrome. *Neurodegener Dis.* 2011;8(3):149-52.
30. Marshall CR, Guerreiro R, Thust S, Fletcher P, Rohrer JD, Fox NC. A Novel MAPT Mutation Causing Corticobasal Syndrome Led by Progressive Apraxia of Speech. *J Alzheimers Dis.* 2015;48(4):923-6.
31. Iovino M, Pfisterer U, Holton JL, Lashley T, Swingle RJ, Calo L, Treacy R, Revesz T, Parmar M, Goedert M, Muqit MM, Spillantini MG. The novel MAPT mutation K298E: mechanisms of mutant tau toxicity, brain pathology and tau expression in induced fibroblast-derived neurons. *Acta Neuropathol.* 2014;127(2):283-95.
32. Villa C, Ghezzi L, Pietroboni AM, Fenoglio C, Cortini F, Serpente M, Cantoni C, Ridolfi E, Marcone A, Benussi L, Ghidoni R, Jacini F, Arighi A, Fumagalli GG, Mandelli A, Binetti G, Cappa S, Bresolin N, Scarpini E, Galimberti D. A novel MAPT mutation associated with the clinical phenotype of progressive nonfluent aphasia. *J Alzheimers Dis.* 2011;26(1):19-26.
33. McCarthy A, Lonergan R, Olszewska DA, O'Dowd S, Cummins G, Magennis B, Fallon EM, Pender N, Huey ED, Cosentino S, O'Rourke K, Kelly BD, O'Connell M, Delon I, Farrell M, Spillantini MG, Rowland LP, Fahn S, Craig P, Hutton M, Lynch T. Closing the tau loop: the missing tau mutation. *Brain.* 2015;138(Pt 10):3100-9.
34. Deramecourt V, Lebert F, Maurice CA, Fernandez-Gomez FJ, Dujardin S, Colin M, Sergeant N, Buée-Scherrer V, Clot F, Ber IL, Brice A, Pasquier F, Buée L. Clinical, neuropathological, and biochemical characterization of the novel tau mutation P332S. *J Alzheimers Dis.* 2012;31(4):741-9.
35. Tacik P, DeTure M, Hinkle KM, Lin WL, Sanchez-Contreras M, Carlomagno Y, Pedraza O, Rademakers R, Ross OA, Wszolek ZK, Dickson DW. A Novel Tau Mutation in Exon 12, p.Q336H, Causes Hereditary Pick Disease. *J Neuropathol Exp Neurol.* 2015;74(11):1042-52.
36. Liang Y, Gordon E, Rohrer J, Downey L, de Silva R, Jäger HR, Nicholas J, Modat M, Cardoso MJ, Mahoney C, Warren J, Rossor M, Fox N, Caine D. A cognitive chameleon: lessons from a novel MAPT mutation case. *Neurocase.* 2014;20(6):684-94.
37. Momeni P, Wickremaratchi MM, Bell J, Arnold R, Beer R, Hardy J, Revesz T, Neal JW, Morris HR. Familial early onset frontotemporal dementia caused by a novel S356T MAPT mutation, initially diagnosed as schizophrenia. *Clin Neurol Neurosurg.* 2010;112(10):917-20.
38. Rossi G, Bastone A, Piccoli E, Morbin M, Mazzoleni G, Fugnanesi V, Beeg M, Del Favero E, Cantù L, Motta S, Salsano E, Pareyson D, Erbetta A, Elia AE, Del Sorbo F, Silani V, Morelli C, Salmona M, Tagliavini F. Different mutations at V363 MAPT codon are associated with atypical clinical phenotypes and show unusual structural and functional features. *Neurobiol Aging.* 2014;35(2):408-17.
39. Rossi G, Bastone A, Piccoli E, Mazzoleni G, Morbin M, Uggetti A, Giaccone G, Sperber S, Beeg M, Salmona M, Tagliavini F. New mutations in MAPT gene causing frontotemporal lobar degeneration: biochemical and structural characterization. *Neurobiol Aging.* 2012;33(4):834.e1-6.

40. Popović M, Fabjan A, Mraz J, Magdič J, Glavač D, Zupan A, Novak MD, Bresjanac M. Tau protein mutation P364S in two sisters: clinical course and neuropathology with emphasis on new, composite neuronal tau inclusions. *Acta Neuropathol.* 2014;128(1):155-7.
41. Tacik P, DeTure MA, Carlomagno Y, Lin WL, Murray ME, Baker MC, Josephs KA, Boeve BF, Wszolek ZK, Graff-Radford NR, Parisi JE, Petrucelli L, Rademakers R, Isaacson RS, Heilman KM, Petersen RC, Dickson DW, Kouri N. FTDP-17 with Pick body-like inclusions associated with a novel tau mutation, p.E372G. *Brain Pathol.* 2017;27(5):612-626.
42. Kouri N, Carlomagno Y, Baker M, Liesinger AM, Caselli RJ, Wszolek ZK, Petrucelli L, Boeve BF, Parisi JE, Josephs KA, Uitti RJ, Ross OA, Graff-Radford NR, DeTure MA, Dickson DW, Rademakers R. Novel mutation in MAPT exon 13 (p.N410H) causes corticobasal degeneration. *Acta Neuropathol.* 2014;127(2):271-82.
43. Redaelli V, Rossi G, Maderna E, Kovacs GG, Piccoli E, Caroppo P, Cacciatore F, Spinello S, Grisoli M, Sozzi G, Salmaggi A, Tagliavini F, Giaccone G. Alzheimer neuropathology without frontotemporal lobar degeneration hallmarks (TAR DNA-binding protein 43 inclusions) in missense progranulin mutation Cys139Arg. *Brain Pathol.* 2018;28(1):72-76.
44. Luzzi S, Colleoni L, Corbetta P, Baldinelli S, Fiori C, Girelli F, Silvestrini M, Caroppo P, Giaccone G, Tagliavini F, Rossi G. Missense mutation in GRN gene affecting RNA splicing and plasma progranulin level in a family affected by frontotemporal lobar degeneration. *Neurobiol Aging.* 2017;54:214.e1-214.e6.

## Section 2) Detailed statistical methods

The different statistical methods used in each part of the Results section are detailed below. Age at Onset = AAO, Age at Death = AAD, Disease Duration = DD.

### Sex distribution

A chi-squared test was used to compare sex distribution in each of the genetic groups.

### Age at Onset, Age at Death and Disease Duration

i) Differences between genetic groups (*GRN*, *MAPT* and *C9orf72*), and ii) within a genetic group (*GRN* and *MAPT*)

We used mixed effects models to examine whether there were differences in AAO, AAD and DD between genetic groups (*C9orf72*, *MAPT* and *GRN*) and between the common mutations in the *GRN* and *MAPT* groups.

Due to the skewed distribution of DD, this was log transformed before analysis. To compare the mean AAO, AAD and DD between the *C9orf72*, *MAPT* and *GRN* groups we included a fixed effect of group in the model ( $g = GRN, MAPT, \text{ or } C9orf72$ ) and used Wald tests for hypothesis testing. The model allowed for relatedness by including a random effect for family membership. The model can be written as:

$$y_{ijg} = \alpha_g + \mu_{jg} + \varepsilon_{ijg} \quad (\text{Equation 1})$$

where,

$y_{ijg}$  is the AAO or AAD for the  $i$ th participant in the  $j$ th family within mutation group  $g$

$\alpha_g$  is the mean for mutation group  $g$

$\mu_{jg}$  is the random deviation for the  $j$ th family away from the mean in group  $g$

$\varepsilon_{ijg}$  is the residual error

The random effects and residual variance were assumed to follow a normal distribution and we assessed this assumption through plots of the residuals from the model. To allow variability in AAO, AAD or DD to differ by genetic group the model included three variance terms for the family random effects and three residual variance terms, one for each of the mutation carrier groups:

$$\mu_{jg} \sim N(0, \sigma_{\mu,g}^2)$$

$$\varepsilon_{ijg} \sim N(0, \sigma_{\varepsilon,g}^2)$$



Within the *GRN* and *MAPT* groups we used a mixed model to examine whether there were differences in mean AAO, AAD or DD between the common mutations. This model included fixed effects for the individual mutation and a random effect for family. Wald tests were used for comparisons between the mutations.

It is important to note that age at death was known for 59% of those with data on age at onset (57% in the *GRN* group, 65% in the *MAPT* group and 57% in the *C9orf72* group). For those with missing data of age at death, no information was available on disease duration or reasons for censoring so it was not possible to take account of this in the analysis (e.g. through survival models). This means the reported disease durations, and extent of variability in disease durations, may be underestimates of the true values.

It is also important to note that we did not account for the particular geographical site where a participant was from within the mixed models as there was no a priori hypothesis about this affecting age at onset or death, but if geography did have an effect then this could have introduced bias.

Lastly, AAO, AAD and DD data were captured in two methods, via a standardized form from the FTD Prevention Initiative sites, and via data taken from Pubmed articles. There is a possibility that AAO, AAD and DD data is differently interpreted when captured via these two methods.

### *iii) Generational analysis*

In order to investigate potential anticipation and differences in AAO between generations we performed a subanalysis investigating families with two generations of AAO data (insufficient data being unavailable to explore three or more generations). Within each genetic group (*GRN*, *MAPT*, and *C9orf72*) we used a mixed effect model in which generation was included as a fixed effect and used a Wald test to examine whether there was evidence of a difference in AAO. Family membership was included as a random effect.

### *Analysis of differences within group of iv) sex and v) phenotype*

We used mixed effects models including random effects for family to examine whether within each mutation carrier group there were differences in AAO, AAD and DD by sex and clinical phenotype. Due to the skewed distribution of DD, this was log transformed before analysis. In each model we included fixed effects for sex or clinical phenotype and used Wald tests for hypothesis testing on these variables.

vi) *Disease duration analysis in MAPT mutation carriers*

In the *MAPT* group we used the same mixed effect modelling approach to examine whether there were systematic differences in DD between those carrying mutations categorised by their functional consequences and underlying pathology into five groups: group 1 (exons 1,2 and 9); group 2 (exon/intron 10 affecting splicing); group 3 (exon 10 not affecting splicing); group 4 (exons 11-13 with non-PHF-tau pathology) and group 5 (exon 11-13 with PHF-tau pathology group).

*Correlation of individual AAO (or AAD) with parental and mean family AAO (or AAD)*

The Pearson correlation coefficient was calculated between a) an individual's AAO (or AAD) and the AAO (or AAD) of their affected parent, and b) an individual's AAO (or AAD) and the average AAO (or AAD) of other members of the same family.

*Modelling variability in age at onset and age at death*

We used mixed effects models to explore the extent to which variability in AAO and AAD were explained by *family membership* and the *specific mutation* carried, and how this differed between the genetic groups.

Firstly, to explore the variability in AAO (and AAD) by *family membership* in all mutation carriers we fitted the two level linear mixed effects model given in equation 1 using the *mixed* command in Stata. This includes a fixed effect for genetic group ( $g = GRN, MAPT, \text{ or } C9orf72$ ) and a random effect for family membership. It allows for variability in AAO (and AAD) to differ by genetic group by including three variance terms for the family random effects and three residual variance terms, one for each of the mutation carrier groups ( $g = GRN, MAPT, \text{ or } C9orf72$ ):

$$\mu_{jg} \sim N(0, \sigma_{\mu,g}^2)$$

$$\varepsilon_{ijg} \sim N(0, \sigma_{\varepsilon,g}^2)$$

To test for heterogeneity in the *within* family variability we used a likelihood ratio test to compare the above model to a simpler model that allowed for different distribution of the family random effect for each mutation carrier group but had one common residual variance for all carriers:

$$\mu_{jg} \sim N(0, \sigma_{\mu,g}^2)$$

$$\varepsilon_{ijg} \sim N(0, \sigma_{\varepsilon}^2)$$

$$\text{i.e. } \sigma_{\varepsilon,GRN}^2 = \sigma_{\varepsilon,MAPT}^2 = \sigma_{\varepsilon,C9orf72}^2$$

To test whether there was heterogeneity in the *between* family variability we used a likelihood ratio test to compare the more complex model to a simpler model that allowed for different residual variance in each mutation carrier group but had one common variance for the family random effect:

$$\mu_{jg} \sim N(0, \sigma_{\mu}^2)$$

$$\varepsilon_{ijg} \sim N(0, \sigma_{\varepsilon,g}^2)$$

$$\text{i.e. } \sigma_{\mu,GRN}^2 = \sigma_{\mu,MAPT}^2 = \sigma_{\mu,C9orf72}^2$$

Secondly, for *GRN* and *MAPT* groups only we explored the extent to which variability in AAO (or AAD) was explained by the specific mutation by fitting a three level model with a fixed effect for genetic group ( $g = GRN$  and *MAPT*), and random effects of family membership nested within mutation carried.

$$y_{ijk} = \alpha_g + \delta_{kg} + \mu_{jk} + \varepsilon_{ijk}$$

Where,

$y_{ijk}$  is the AAO or AAD for the  $i$ th participant in the  $j$ th family with specific mutation  $k$ , within mutation group  $g$

$\alpha_g$  is the mean for mutation group  $g$

$\mu_{jk}$  is the random deviation for the  $j$ th family with specific mutation  $k$  away from the mean in group  $g$

$\delta_{kg}$  is the random deviation for those carrying specific mutation  $k$  away from the mean in group  $g$

$\varepsilon_{ijk}$  is the residual error

As before, to allow variability in AAO (and AAD) to differ by genetic group we allowed for different variance of the family random effect and residual variance for each of the mutation carrier groups ( $g = GRN, MAPT$ ). In addition, we also allowed variability of the specific mutation random effect to differ by carrier group ( $g = GRN, MAPT$ )

$$\delta_{kg} \sim N(0, \sigma_{\delta,g}^2)$$

$$\mu_{jk} \sim N(0, \sigma_{\mu,g}^2)$$

$$\varepsilon_{ijk} \sim N(0, \sigma_{\varepsilon,g}^2)$$

To test whether *GRN* and *MAPT* groups differed in the extent to which the variability in AAO (and AAD) was due to the *specific mutation* we used a likelihood ratio test to compare the above model to a simpler model with one common variance for the specific mutation random effect, but still allowing for different family variance and residual variance terms for each mutation carrier group:

$$\delta_{kg} \sim N(0, \sigma_{\delta}^2)$$

$$\mu_{jkg} \sim N(0, \sigma_{\mu,g}^2)$$

$$\varepsilon_{ijk} \sim N(0, \sigma_{\varepsilon,g}^2)$$

$$\text{i.e. } \sigma_{\delta,GRN}^2 = \sigma_{\delta,MAPT}^2 = \sigma_{\delta,C9orf72}^2$$

For the best fitting model, the intraclass correlation was used to quantify the degree of variability explained by family and by the specific mutation. Confidence intervals for the ICC were calculated in Stata using the *estat icc* command.

For a model which included only family random effect (e.g. in *C9orf72* carriers) the ICC for family was:

$$ICC(family) = \frac{\sigma_{\mu,g}^2}{\sigma_{\mu,g}^2 + \sigma_{\varepsilon,g}^2}$$

For a model which included random effects for both family and specific mutation random effect the ICC for specific mutation was:

$$ICC(mutation) = \frac{\sigma_{\delta,g}^2}{\sigma_{\delta,g}^2 + \sigma_{\mu,g}^2 + \sigma_{\varepsilon,g}^2}$$

And the ICC for family was:

$$ICC(family) = \frac{\sigma_{\delta,g}^2 + \sigma_{\mu,g}^2}{\sigma_{\delta,g}^2 + \sigma_{\mu,g}^2 + \sigma_{\varepsilon,g}^2}$$

The ICC for family includes both the family and specific mutation variance components in the numerator because members of the same family also share the same mutation.

### Section 3) Geographical distribution

Geographical variability in the prevalence of the different genetic groups is shown in the main text and in Figure

I. Data from the following countries was included in the study:

| Countries in the FPI | Other countries |
|----------------------|-----------------|
| Australia            | Austria         |
| Belgium              | Brazil          |
| Canada               | Chile           |
| France               | China           |
| Germany              | Cyprus          |
| Italy                | Czech Republic  |
| Netherlands          | Denmark         |
| Portugal             | Finland         |
| Spain                | Greece          |
| Sweden               | India           |
| UK                   | Ireland         |
| USA                  | Israel          |
|                      | Japan           |
|                      | Malaysia        |
|                      | Poland          |
|                      | Slovenia        |
|                      | Switzerland     |

### Discussion

The study supports previous work suggesting that the most common genetic form of FTD overall across the world is due to pathogenic expansions of the *C9orf72* gene<sup>45,46</sup>. However, there is geographical variability: in Italy, *GRN* mutations are the most common cause of genetic FTD<sup>47</sup>, mainly due to a large founder family with the T272fs variant<sup>48</sup>, the most common *GRN* mutation in our study. Similarly, there are large *GRN* founder families in Spain (IVS7-IG>A<sup>49,50</sup>, in the Basque country) as well as in Belgium (IVS1+5G>C<sup>51,52</sup>). *MAPT* mutations are the least common form of genetic FTD overall, although they are more common in some countries than others: in the Netherlands, this is due to a variety of mutations, whilst in the US, although different mutations contribute, there are a number of large families e.g. the pallido-ponto-nigral-degeneration (PPND) family with the N279K mutation<sup>53-55</sup>; similarly, in the UK, *MAPT* mutations are almost as common as *C9orf72* mutations due to a large founder family from the North Wales area of the UK with the IVS10+16C>T mutation<sup>56</sup>. In contrast, some of the most common mutations are seen across the world in a wider distribution e.g. the *GRN* R493X<sup>57</sup> and *MAPT*

P301L<sup>58-61</sup> mutations. Whilst *C9orf72* expansions are seen across the world, they are more common in North America and Europe (particularly the Nordic countries) than Asia<sup>62-66</sup>. One limitation of this study was our focus on age at onset and death data rather than ascertaining all families reported in the literature (i.e. those without any data were not included), and so the data may be an underrepresentation of some mutations, given the emphasis was not specifically on geographical variability.

## References

45. Renton AE, Majounie E, Waite A, Simón-Sánchez J, Rollinson S, Gibbs JR, Schymick JC, Laaksovirta H, van Swieten JC, Myllykangas L, Kalimo H, Paetau A, Abramzon Y, Remes AM, Kaganovich A, Scholz SW, Duckworth J, Ding J, Harmer DW, Hernandez DG, Johnson JO, Mok K, Ryten M, Trabzuni D, Guerreiro RJ, Orrell RW, Neal J, Murray A, Pearson J, Jansen IE, Sondervan D, Seelaar H, Blake D, Young K, Halliwell N, Callister JB, Toulson G, Richardson A, Gerhard A, Snowden J, Mann D, Neary D, Nalls MA, Peuralinna T, Jansson L, Isoviita VM, Kaivorinne AL, Hölttä-Vuori M, Ikonen E, Sulkava R, Benatar M, Wu J, Chiò A, Restagno G, Borghero G, Sabatelli M; ITALSGEN Consortium, Heckerman D, Rogava E, Zinman L, Rothstein JD, Sendtner M, Drepper C, Eichler EE, Alkan C, Abdullaev Z, Pack SD, Dutra A, Pak E, Hardy J, Singleton A, Williams NM, Heutink P, Pickering-Brown S, Morris HR, Tienari PJ, Traynor BJ. A hexanucleotide repeat expansion in *C9ORF72* is the cause of chromosome 9p21-linked ALS-FTD. *Neuron*. 2011;72(2):257-68.
46. DeJesus-Hernandez M, Mackenzie IR, Boeve BF, Boxer AL, Baker M, Rutherford NJ, Nicholson AM, Finch NA, Flynn H, Adamson J, Kouri N, Wojtas A, Sengdy P, Hsiung GY, Karydas A, Seeley WW, Josephs KA, Coppola G, Geschwind DH, Wszolek ZK, Feldman H, Knopman DS, Petersen RC, Miller BL, Dickson DW, Boylan KB, Graff-Radford NR, Rademakers R. Expanded GGGGCC hexanucleotide repeat in noncoding region of *C9ORF72* causes chromosome 9p-linked FTD and ALS. *Neuron*. 2011;72(2):245-56.
47. Fostinelli S, Ciani M, Zanardini R, Zanetti O, Binetti G, Ghidoni R, Benussi L. The Heritability of Frontotemporal Lobar Degeneration: Validation of Pedigree Classification Criteria in a Northern Italy Cohort. *J Alzheimers Dis*. 2018;61(2):753-760.
48. Borroni B, Bonvicini C, Galimberti D, Tremolizzo L, Papetti A, Archetti S, Turla M, Alberici A, Agosti C, Premi E, Appollonio I, Rainero I, Ferrarese C, Gennarelli M, Scarpini E, Padovani A. Founder effect and estimation of the age of the Progranulin Thr272fs mutation in 14 Italian pedigrees with frontotemporal lobar degeneration. *Neurobiol Aging*. 2011;32(3):555.e1-8.
49. Moreno F, Indakoetxea B, Barandiaran M, Alzualde A, Gabilondo A, Estanga A, Ruiz J, Ruibal M, Bergareche A, Martí-Massó JF, López de Munain A. "Frontotemporoparietal" dementia: clinical phenotype associated with the c.709-IG>A PGRN mutation. *Neurology*. 2009;73(17):1367-74.
50. Moreno F, Alzualde A, Cambler PM, Barandiaran M, Van Deerlin VM, Gabilondo A, Martí Massó JF, López de Munain A, Indakoetxea B. Prion protein codon 129 polymorphism modifies age at onset of frontotemporal dementia with the C.709-IG>A progranulin mutation. *Alzheimer Dis Assoc Disord*. 2011;25(1):93-5.
51. Brouwers N, Nuytemans K, van der Zee J, Gijssels I, Engelborghs S, Theuns J, Kumar-Singh S, Pickut BA, Pals P, Dermaut B, Bogaerts V, De Pooter T, Serneels S, Van den Broeck M, Cuijt I, Mattheijssens M, Peeters K, Sciot R, Martin JJ, Cras P, Santens P, Vandenberghe R, De Deyn PP, Cruts M, Van Broeckhoven C, Sleegers K. Alzheimer and Parkinson diagnoses in progranulin null mutation carriers in an extended founderfamily. *Arch Neurol*. 2007;64(10):1436-46.
52. Wauters E, Van Mossevelde S, Sleegers K, van der Zee J, Engelborghs S, Sieben A, Vandenberghe R, Philtjens S, Van den Broeck M, Peeters K, Cuijt I, De Coster W, Van Langenhove T, Santens P, Ivanoiu A, Cras P, De Bleecker JL, Versijpt J, Crols R, De Klippel N,

- Martin JJ, De Deyn PP, Cruts M, Van Broeckhoven C; Belgian Neurology (BELNEU) Consortium. Clinical variability and onset age modifiers in an extended Belgian GRN founder family. *Neurobiol Aging*. 2018;67:84-94.
53. Clark LN, Poorkaj P, Wszolek Z, Geschwind DH, Nasreddine ZS, Miller B, Li D, Payami H, Awert F, Markopoulou K, Andreadis A, D'Souza I, Lee VM, Reed L, Trojanowski JQ, Zhukareva V, Bird T, Schellenberg G, Wilhelmsen KC. Pathogenic implications of mutations in the tau gene in pallido-ponto-nigral degeneration and related neurodegenerative disorders linked to chromosome 17. *Proc Natl Acad Sci U S A*. 1998;95(22):13103-7.
  54. Ferman TJ, McRae CA, Arvanitakis Z, Tsuboi Y, Vo A, Wszolek ZK. Early and pre-symptomatic neuropsychological dysfunction in the PPNd family with the N279K tau mutation. *Parkinsonism Relat Disord*. 2003;9(5):265-70.
  55. Slowinski J, Dominik J, Uitti RJ, Ahmed Z, Dickson DD, Wszolek ZK. Frontotemporal dementia and Parkinsonism linked to chromosome 17 with the N279K tau mutation. *Neuropathology*. 2007;27(1):73-80.
  56. Colombo R, Tavian D, Baker MC, Richardson AM, Snowden JS, Neary D, Mann DM, Pickering-Brown SM. Recent origin and spread of a common Welsh MAPT splice mutation causing frontotemporal lobar degeneration. *Neurogenetics*. 2009;10(4):313-8.
  57. Rademakers R, Baker M, Gass J, Adamson J, Huey ED, Momeni P, Spina S, Coppola G, Karydas AM, Stewart H, Johnson N, Hsiung GY, Kelley B, Kuntz K, Steinbart E, Wood EM, Yu CE, Josephs K, Sorenson E, Womack KB, Weintraub S, Pickering-Brown SM, Schofield PR, Brooks WS, Van Deerlin VM, Snowden J, Clark CM, Kertesz A, Boylan K, Ghetti B, Neary D, Schellenberg GD, Beach TG, Mesulam M, Mann D, Grafman J, Mackenzie IR, Feldman H, Bird T, Petersen R, Knopman D, Boeve B, Geschwind DH, Miller B, Wszolek Z, Lippa C, Bigio EH, Dickson D, Graff-Radford N, Hutton M. Phenotypic variability associated with progranulin haploinsufficiency in patients with the common I477C-->T (Arg493X) mutation: an international initiative. *Lancet Neurol*. 2007;6(10):857-68.
  58. Hutton M, Lendon CL, Rizzu P, Baker M, Froelich S, Houlden H, Pickering-Brown S, Chakraverty S, Isaacs A, Grover A, Hackett J, Adamson J, Lincoln S, Dickson D, Davies P, Petersen RC, Stevens M, de Graaff E, Wauters E, van Baren J, Hillebrand M, Joosse M, Kwon JM, Nowotny P, Che LK, Norton J, Morris JC, Reed LA, Trojanowski J, Basun H, Lannfelt L, Neystat M, Fahn S, Dark F, Tannenberg T, Dodd PR, Hayward N, Kwok JB, Schofield PR, Andreadis A, Snowden J, Craufurd D, Neary D, Owen F, Oostra BA, Hardy J, Goate A, van Swieten J, Mann D, Lynch T, Heutink P. Association of missense and 5'-splice-site mutations in tau with the inherited dementia FTDP-17. *Nature*. 1998;393(6686):702-5.
  59. Borrego-Écija S, Morgado J, Palencia-Madrid L, Grau-Rivera O, Reñé R, Hernández I, Almenar C, Balasa M, Antonell A, Molinuevo JL, Lladó A, Martínez de Pancorbo M, Gelpi E, Sánchez-Valle R. Frontotemporal Dementia Caused by the P301L Mutation in the MAPT Gene: Clinicopathological Features of 13 Cases from the Same Geographical Origin in Barcelona, Spain. *Dement Geriatr Cogn Disord*. 2017;44(3-4):213-221.
  60. Gatto EM, Allegri RF, Da Prat G, Chrem Mendez P, Hanna DS, Dorschner MO, Surace EI, Zabetian CP, Mata IF. Intrafamilial variable phenotype including corticobasal syndrome in a family with p.P301L mutation in the MAPT gene: first report in South America. *Neurobiol Aging*. 2017;53:195.e11-195.e17.
  61. Miki T, Yokota O, Takenoshita S, Mori Y, Yamazaki K, Ozaki Y, Ueno SI, Haraguchi T, Ishizu H, Kuroda S, Terada S, Yamada N. Frontotemporal lobar degeneration due to P301L tau mutation showing apathy and severe frontal atrophy but lacking other behavioral changes: A case report and literature review. *Neuropathology*. 2018;38(3):268-280.
  62. Majounie E, Renton AE, Mok K, Dopper EG, Waite A, Rollinson S, Chiò A, Restagno G, Nicolaou N, Simon-Sanchez J, van Swieten JC, Abramzon Y, Johnson JO, Sendtner M, Pamphlett R, Orrell RW, Mead S, Sidle KC, Houlden H, Rohrer JD, Morrison KE, Pall H, Talbot K, Ansorge O; Chromosome 9-ALS/FTD Consortium; French research network on FTL/FTLD/ALS; ITALSGEN Consortium, Hernandez DG, Arepalli S, Sabatelli M, Mora G, Corbo M, Giannini F, Calvo A, Englund E, Borghero G, Floris GL, Remes AM,

- Laaksovirta H, McCluskey L, Trojanowski JQ, Van Deerlin VM, Schellenberg GD, Nalls MA, Drory VE, Lu CS, Yeh TH, Ishiura H, Takahashi Y, Tsuji S, Le Ber I, Brice A, Drepper C, Williams N, Kirby J, Shaw P, Hardy J, Tienari PJ, Heutink P, Morris HR, Pickering-Brown S, Traynor BJ. Frequency of the C9orf72 hexanucleotide repeat expansion in patients with amyotrophic lateral sclerosis and frontotemporal dementia: a cross-sectional study. *Lancet Neurol.* 2012;11(4):323-30.
63. Smith BN, Newhouse S, Shatunov A, Vance C, Topp S, Johnson L, Miller J, Lee Y, Troakes C, Scott KM, Jones A, Gray I, Wright J, Hortobágyi T, Al-Sarraj S, Rogelj B, Powell J, Lupton M, Lovestone S, Sapp PC, Weber M, Nestor PJ, Schelhaas HJ, Asbroek AA, Silani V, Gellera C, Taroni F, Ticozzi N, Van den Berg L, Veldink J, Van Damme P, Robberecht W, Shaw PJ, Kirby J, Pall H, Morrison KE, Morris A, de Bellerocche J, Vianney de Jong JM, Baas F, Andersen PM, Landers J, Brown RH Jr, Weale ME, Al-Chalabi A, Shaw CE. The C9ORF72 expansion mutation is a common cause of ALS+/-FTD in Europe and has a single founder. *Eur J Hum Genet.* 2013;21(1):102-8.
64. Ogaki K, Li Y, Atsuta N, Tomiyama H, Funayama M, Watanabe H, Nakamura R, Yoshino H, Yato S, Tamura A, Naito Y, Taniguchi A, Fujita K, Izumi Y, Kaji R, Hattori N, Sobue G; Japanese Consortium for Amyotrophic Lateral Sclerosis research (JaCALS). Analysis of C9orf72 repeat expansion in 563 Japanese patients with amyotrophic lateral sclerosis. *Neurobiol Aging.* 2012;33(10):2527.e11-6.
65. Mok KY, Koutsis G, Schottlaender LV, Polke J, Panas M, Houlden H. High frequency of the expanded C9ORF72 hexanucleotide repeat in familial and sporadic Greek ALS patients. *Neurobiol Aging.* 2012;33(8):1851.e1-5.
66. Jiao B, Tang B, Liu X, Yan X, Zhou L, Yang Y, Wang J, Xia K, Shen L. Identification of C9orf72 repeat expansions in patients with amyotrophic lateral sclerosis and frontotemporal dementia in mainland China. *Neurobiol Aging.* 2014;35(4):936.e19-22.



#### **Section 4) Clinical phenotype**

Many family members in previous generations did not have a specific diagnosis beyond 'dementia' and here they are categorized as 'Dementia-not otherwise specified' (Table 2 in main text, Supplementary Table 6). *Excluding these cases from a phenotypic analysis*, most patients in each group had a clinical diagnosis within the FTD spectrum (82% in *GRN*, 85% in *MAPT*, 87% in *C9orf72*). The most common phenotype was bvFTD across all three genetic groups: 55% of patients with *GRN* mutations, 66% of those in the *MAPT* mutation group and 42% of those with *C9orf72* expansions. Beyond bvFTD, there was variability across the mutations: PPA was a more common diagnosis in *GRN* mutation carriers (20%) with the specific variant usually being *nvPPA* or PPA-NOS, compared with *MAPT* (6%) or *C9orf72* (4%). ALS (or FTD-ALS) was only a very rare occurrence in *GRN* (2%) or *MAPT* mutation carriers (1%) whereas 40% of *C9orf72* expansion carriers had either pure ALS (26%) or an FTD-ALS overlap (15%). CBS was seen not uncommonly in the *GRN* group (6%) and more rarely in the *MAPT* group (3%) but only in 2 patients in the *C9orf72* group. In comparison, a PSP syndrome (Richardson's syndrome) was seen in 6% of *MAPT* mutation carriers but not in the *GRN* group and in only 1 *C9orf72* expansion carrier. In each of the groups, clinical diagnoses outside of the FTD spectrum were seen in a sizeable minority: AD in 12% of *GRN*, 4% of *MAPT* and 8% of *C9orf72*; and Parkinson's disease (PD) had been diagnosed in 2% of *GRN*, 7% of *MAPT* and 1% of *C9orf72*.

Looking at the common mutations individually (Supplementary Table 6), the majority of *GRN* mutations had a similar pattern, with bvFTD being the most common phenotype and a substantial minority having PPA: T272fs 47% bvFTD, 18% PPA; R493X 49% bvFTD, 30% PPA; IVS7-1G>A 61% bvFTD, 18% PPA; C31fs 44% bvFTD, 25% PPA; and G35fs 49% bvFTD, 31% PPA. However, the A9D mutation was predominantly associated with bvFTD, found in 84% of patients. In the common *MAPT* mutations, P301L and R406W were associated mainly with bvFTD: 91% in both mutations. In comparison, the N279K mutation was associated mainly with a primary parkinsonian phenotype (94% with a primary diagnosis of PSP, CBS or PD). The IVS10+16C>T mutation was associated mainly with bvFTD (67%) but with a significant minority having a primary parkinsonian phenotype (17%).

**Supplementary Table 6: Individual primary clinical diagnoses in each of the mutations. Diagnoses within the frontotemporal dementia (FTD) spectrum include behavioural variant FTD (bvFTD), the primary progressive aphasia (PPA) subtypes [nfv = nonfluent variant, sv = semantic variant, lv = logopenic variant, PPA-NOS = PPA not otherwise specific i.e. does not meet criteria for a specific subtype], FTD with amyotrophic lateral sclerosis (ALS), ALS, corticobasal syndrome (CBS) and progressive supranuclear palsy (PSP). Diagnoses outside the FTD spectrum include Alzheimer’s disease (AD), Huntington’s disease (HD), Parkinson’s disease (PD), Dementia with Lewy Bodies (DLB), VaD (vascular dementia) and a dementia diagnosis not otherwise specific (Dementia-NOS).**

|                            | bvFTD       | nfvPPA     | svPPA     | lvPPA    | PPA-NOS   | FTD-ALS    | ALS        | CBS       | PSP       | AD         | HD       | PD        | DLB       | VaD       | Dementia-NOS | Other     |
|----------------------------|-------------|------------|-----------|----------|-----------|------------|------------|-----------|-----------|------------|----------|-----------|-----------|-----------|--------------|-----------|
| <b>All mutations total</b> | <b>1250</b> | <b>147</b> | <b>40</b> | <b>7</b> | <b>42</b> | <b>166</b> | <b>284</b> | <b>63</b> | <b>34</b> | <b>205</b> | <b>5</b> | <b>70</b> | <b>10</b> | <b>17</b> | <b>997</b>   | <b>66</b> |
| <b>GRN total</b>           | <b>446</b>  | <b>107</b> | <b>13</b> | <b>4</b> | <b>36</b> | <b>7</b>   | <b>7</b>   | <b>47</b> | <b>0</b>  | <b>97</b>  | <b>0</b> | <b>16</b> | <b>4</b>  | <b>9</b>  | <b>361</b>   | <b>25</b> |
| delGRN[DR184]              | 1           |            |           |          |           |            |            |           |           |            |          |           |           |           |              |           |
| IVS1+3A>T                  |             |            |           |          |           |            |            |           |           |            |          |           |           |           | 1            |           |
| IVS1+5G>C                  | 15          | 12         | 2         | 1        |           |            |            |           |           | 2          |          |           |           |           | 2            | 1         |
| delGRN [London]            | 1           |            |           |          | 1         |            |            |           |           |            |          |           |           |           | 5            |           |
| delGRN[French]             | 5           | 2          |           |          |           | 1          | 1          |           |           |            |          | 1         |           |           | 5            | 1         |
| delGRN[Tubingen]           | 1           |            |           |          |           |            |            |           |           |            |          |           |           |           |              |           |
| MI (1A>G)                  | 2           | 1          |           |          | 1         |            |            | 1         |           | 2          |          |           |           |           | 1            |           |
| MI (2T>C)                  | 1           |            |           |          |           |            |            |           |           |            |          |           |           |           | 3            |           |
| MI (3G>A)                  |             |            |           |          |           |            |            |           |           |            |          |           |           |           | 2            |           |
| A9D                        | 31          |            |           |          |           |            |            | 2         |           | 1          |          |           |           |           | 3            |           |
| C20fs                      |             |            |           |          |           |            |            |           |           |            |          |           |           |           |              |           |
| D22fs                      | 5           | 1          |           |          |           |            |            |           |           |            |          |           |           |           | 3            |           |
| C26X                       |             |            |           |          |           |            |            |           |           |            |          |           |           |           |              |           |
| C30fs                      | 2           |            |           |          |           |            |            |           |           |            |          |           |           |           | 1            |           |
| C31fs                      | 7           | 4          |           |          |           | 2          |            | 1         |           | 2          |          |           |           |           | 31           |           |
| G35fs                      | 17          | 5          | 1         |          | 5         | 1          |            |           |           | 2          |          |           |           | 4         | 7            |           |
| S40fs                      |             |            |           |          |           |            |            |           |           |            |          |           |           |           |              |           |
| IVS2+1G>A                  | 1           |            |           |          |           |            |            |           |           |            |          |           |           |           | 2            |           |
| IVS2-4C>T                  |             |            |           |          |           |            | 1          |           |           |            |          |           |           |           |              |           |
| D47fs                      |             |            |           |          |           |            |            |           |           |            |          |           |           |           | 1            |           |
| T52fs                      | 8           | 2          | 1         |          | 1         |            |            | 2         |           | 9          |          | 1         |           |           | 13           |           |
| S78fs                      | 1           |            |           |          |           |            |            | 1         |           |            |          |           |           |           |              |           |
| G79fs                      | 1           |            |           |          |           |            |            |           |           |            |          |           |           |           | 1            |           |
| S82fs                      | 22          | 2          |           |          |           |            |            |           |           |            |          |           |           |           | 7            |           |
| F86fs                      |             |            |           |          |           |            |            |           |           |            |          |           |           |           |              |           |
| IVS3+2T>C                  |             | 1          |           |          |           |            |            | 1         |           | 1          |          |           |           |           | 2            |           |
| IVS3-2delA                 |             | 2          |           |          |           |            |            |           |           |            |          |           |           |           | 1            |           |

|                         | bvFTD | nvPPA | svPPA | lvPPA | PPA-NOS | FTD-ALS | ALS | CBS | PSP | AD | HD | PD | DLB | VaD | Dementia-NOS | Other |
|-------------------------|-------|-------|-------|-------|---------|---------|-----|-----|-----|----|----|----|-----|-----|--------------|-------|
| D94fs                   |       |       |       |       |         |         |     |     |     |    |    |    |     |     |              |       |
| C99fs                   | 1     |       |       |       |         |         |     |     |     |    |    |    |     |     | 1            |       |
| P100fs                  |       |       |       |       |         |         |     |     |     |    |    |    |     |     | 1            |       |
| C105fs                  | 1     |       |       |       |         |         |     |     |     |    |    |    |     |     |              |       |
| C105Y                   | 2     |       |       |       |         |         |     |     |     |    |    | 1  |     |     | 1            |       |
| R110X                   | 5     | 1     |       |       |         |         |     |     |     |    |    |    |     |     | 2            |       |
| S116X                   |       |       |       |       |         |         |     |     |     |    |    |    |     |     | 1            |       |
| IVS4-1G>C               |       |       | 1     |       |         |         |     |     |     |    |    |    |     |     |              |       |
| IVS4-1G>T               |       |       |       |       |         |         |     |     |     |    |    |    |     |     | 6            |       |
| N118fs                  | 1     |       |       |       |         |         |     |     |     |    |    |    |     |     |              |       |
| V121fs                  | 3     |       |       |       |         |         |     |     |     |    |    |    |     |     | 3            |       |
| Q125X                   | 5     | 1     |       |       |         |         |     |     |     |    |    |    |     |     | 4            |       |
| C126X                   |       |       |       |       |         |         |     |     |     |    |    |    |     |     | 2            |       |
| P127fs                  | 1     |       |       |       |         |         |     |     |     |    |    |    |     |     | 1            |       |
| Q130fs (384_387delTAGT) | 2     |       |       |       |         |         |     |     |     |    |    |    |     |     | 2            |       |
| Q130fs (388_391delCAGT) | 9     | 2     |       |       |         |         |     | 1   |     | 4  |    |    |     |     | 7            |       |
| V141fs                  | 1     |       |       |       |         |         |     |     |     |    |    |    |     |     | 2            |       |
| C149fs                  | 4     |       |       |       |         |         |     |     |     | 1  |    |    |     |     | 4            |       |
| A155fs                  | 1     |       |       |       |         |         |     |     |     | 1  |    |    |     |     | 1            |       |
| C157fs                  | 9     | 6     |       |       | 1       |         |     | 2   |     |    |    | 1  |     |     | 9            | 2     |
| R161fs                  | 1     |       |       |       |         |         |     |     |     |    |    |    |     |     |              |       |
| L187fs (559del)         |       |       |       |       |         |         |     |     |     |    |    |    |     |     |              |       |
| L187fs (559dup)         | 2     |       |       |       |         |         |     | 1   |     |    |    |    |     |     |              |       |
| R198fs                  |       |       |       |       |         |         |     |     |     | 1  |    |    |     |     | 1            |       |
| A199V                   | 4     | 1     | 1     |       |         | 1       |     | 2   |     |    |    |    |     |     | 2            |       |
| S203fs (603_604insC)    | 1     | 1     |       |       |         |         |     |     |     |    |    |    |     |     | 1            |       |
| S203fs (607delT)        | 1     |       |       |       |         |         |     |     |     |    |    |    |     |     |              |       |
| S226fs                  | 1     | 2     |       |       |         |         |     |     |     |    |    |    |     |     | 3            |       |
| Y229X                   | 1     |       |       |       |         |         |     | 1   |     |    |    |    |     | 1   | 2            |       |
| IVS7+1G>A               | 7     |       |       |       |         |         |     | 2   |     |    |    |    |     |     | 5            |       |
| IVS7+1G>C               |       |       |       |       |         |         |     |     |     |    |    |    |     |     | 1            |       |
| IVS7+5_8delGTGA         |       | 2     |       |       |         |         |     |     |     |    |    |    |     |     | 6            |       |
| IVS7+6_9delTGAG         | 5     | 1     |       |       | 1       |         |     |     |     | 5  |    |    |     |     | 5            |       |
| IVS7-2A>G               | 5     |       |       | 1     |         |         | 3   |     |     | 1  |    |    |     |     |              |       |
| IVS7-2A>T               | 9     | 1     |       |       |         |         |     |     |     |    |    |    |     |     | 2            |       |
| IVS7-1G>A               | 23    | 7     |       |       |         |         |     | 1   |     | 5  |    | 1  |     |     | 12           | 1     |
| Q249X                   | 6     |       |       |       |         |         |     |     |     |    |    |    |     |     |              |       |
| C253X                   | 1     |       | 1     |       |         |         |     |     |     | 1  |    |    | 1   |     | 1            |       |
| D254fs                  | 1     |       |       |       |         |         |     |     |     | 2  |    |    |     |     |              |       |
| L255fs                  |       |       |       |       |         |         |     |     |     | 1  |    | 1  |     |     | 1            |       |
| Q257fs                  | 7     | 1     | 1     |       | 3       |         |     |     |     | 1  |    |    |     |     | 3            |       |
| K259X                   | 2     |       |       |       |         |         |     |     |     |    |    |    |     |     | 2            |       |
| T272fs                  | 71    | 18    |       |       | 9       | 2       |     | 11  |     | 22 |    | 1  | 2   | 1   | 51           | 13    |

|                        | bvFTD | nvPPA | svPPA | lvPPA | PPA-NOS | FTD-ALS | ALS | CBS | PSP | AD | HD | PD | DLB | VaD | Dementia-NOS | Other |
|------------------------|-------|-------|-------|-------|---------|---------|-----|-----|-----|----|----|----|-----|-----|--------------|-------|
| A237fs                 | 28    |       |       |       | 1       |         |     |     |     | 2  |    |    |     |     | 2            |       |
| T278fs                 | 2     |       |       |       |         |         |     |     |     |    |    |    |     |     | 4            |       |
| IVS8-1G>C              | 2     |       |       |       |         |         |     | 2   |     | 2  |    |    |     |     |              | 1     |
| IVS8-1G>T              | 1     |       |       |       |         |         |     |     |     |    |    | 1  |     |     |              |       |
| D285fs                 |       |       |       |       |         |         |     |     |     |    |    |    |     |     | 1            |       |
| Y294X                  | 3     | 1     |       |       |         |         |     |     |     |    |    |    |     |     | 5            |       |
| Q300X                  | 9     | 2     |       |       |         |         | 2   |     |     |    |    |    |     |     | 5            |       |
| S301fs                 | 11    | 2     |       |       | 1       |         |     | 1   |     |    |    |    |     |     | 5            | 2     |
| G302fs                 |       |       |       |       |         |         |     |     |     |    |    |    |     |     |              |       |
| A303fs (907_908insG)   | 1     | 1     |       |       |         |         |     |     |     |    |    |    |     |     |              |       |
| A303fs (907delG)       | 1     |       |       |       |         |         |     |     |     |    |    |    |     |     |              |       |
| W304fs (909delC)       | 1     |       |       |       |         |         |     | 2   |     |    |    |    |     |     | 1            |       |
| W304fs (910_911insTG)  | 1     | 2     |       |       |         |         |     |     |     | 2  |    | 5  |     |     | 9            |       |
| W304X                  | 2     |       |       |       |         |         |     | 1   |     |    |    |    |     |     | 6            |       |
| IVS9+1delG             | 1     |       |       |       |         |         |     |     |     |    |    |    |     |     | 4            |       |
| IVS9+1G>A              | 2     |       |       |       |         |         |     | 1   |     | 3  |    |    |     |     | 2            |       |
| C314X                  | 3     |       |       |       |         |         |     |     |     |    |    |    |     |     | 3            |       |
| F326fs                 |       |       |       |       |         |         |     |     |     |    |    |    |     |     |              |       |
| T330fs                 |       |       |       |       |         |         |     |     |     |    |    |    |     |     |              | 1     |
| Q331fs                 | 3     |       |       |       |         |         |     |     |     |    |    |    |     |     | 1            |       |
| G333fs                 |       | 1     | 1     |       |         |         |     |     |     |    |    |    |     |     | 1            |       |
| Q337X                  |       |       |       |       |         |         |     |     |     |    |    |    |     |     | 2            |       |
| Q337_340del            |       |       |       |       |         |         |     | 1   |     |    |    |    |     |     |              |       |
| G338fs                 |       | 1     |       |       |         |         |     |     |     |    |    |    |     |     |              |       |
| H340fs                 | 2     |       |       |       |         |         |     |     |     |    |    |    |     |     |              |       |
| Q341X                  | 1     | 1     |       |       | 1       |         |     |     |     | 1  |    |    |     | 1   | 2            |       |
| A350fs                 | 1     |       |       |       |         |         |     | 1   |     |    |    |    |     |     | 3            |       |
| P357fs                 | 1     |       |       |       |         |         |     |     |     |    |    |    |     |     |              |       |
| Q358X                  |       |       |       |       |         |         |     |     |     |    |    |    |     |     |              |       |
| C366fs                 | 1     | 3     |       |       | 3       |         |     |     |     | 4  |    |    |     |     | 2            |       |
| P373S                  | 2     |       |       |       |         |         |     |     |     |    |    |    |     |     | 2            |       |
| T382fs (1144_1145insA) |       |       |       |       |         |         |     |     |     |    |    |    |     |     | 1            |       |
| T382fs (1145delC)      | 2     |       | 1     |       |         |         |     | 1   |     |    |    |    |     |     | 5            |       |
| W386X                  | 4     |       |       |       | 1       |         |     |     |     | 1  |    |    |     |     | 5            |       |
| A394fs                 |       |       |       |       |         |         |     |     |     |    |    |    |     |     | 1            |       |
| IVS10+2T>C             | 1     |       |       |       |         |         |     |     |     |    |    |    |     |     | 1            |       |
| IVS10+3A>G             | 1     |       |       |       |         |         |     |     |     | 1  |    |    |     |     | 1            |       |
| D399fs                 | 1     |       |       |       |         |         |     |     |     |    |    |    |     |     | 1            |       |
| Q401X                  | 2     | 1     |       |       |         |         |     |     |     |    |    |    |     |     | 1            | 1     |
| C404X                  | 1     |       |       |       |         |         |     |     |     |    |    |    |     |     |              |       |
| V411fs                 | 1     |       |       |       |         |         |     |     |     |    |    |    |     |     | 1            |       |
| A412X                  |       |       |       |       |         |         |     |     |     |    |    |    | 1   |     |              |       |
| Q415X                  | 5     | 1     |       |       |         |         |     |     |     |    |    |    |     |     |              |       |

|                   | bvFTD      | nvPPA     | svPPA     | lvPPA    | PPA-NOS  | FTD-ALS  | ALS      | CBS       | PSP       | AD        | HD       | PD        | DLB      | VaD      | Dementia-NOS | Other     |
|-------------------|------------|-----------|-----------|----------|----------|----------|----------|-----------|-----------|-----------|----------|-----------|----------|----------|--------------|-----------|
| C416fs            |            |           |           |          |          |          |          |           |           | 5         |          |           |          | 2        | 4            |           |
| R418X             | 4          | 2         |           |          |          |          |          | 1         |           |           |          |           |          |          | 13           |           |
| I422fs            | 1          | 1         |           |          |          |          |          |           |           | 1         |          | 1         |          |          | 2            |           |
| D441fs            | 1          | 3         |           |          | 1        |          |          | 2         |           |           |          | 1         |          |          | 3            |           |
| V452fs            | 4          | 2         |           |          |          |          |          |           |           |           |          |           |          |          | 3            |           |
| C466fs            | 1          |           |           |          |          |          |          |           |           |           |          |           |          |          | 3            |           |
| Q468X             | 1          |           |           |          |          |          |          |           |           |           |          |           |          |          | 2            |           |
| A472_Q548del      |            |           |           |          |          |          |          | 2         |           |           |          |           |          |          |              |           |
| A472fs            |            |           | 2         | 1        |          |          |          |           |           | 1         |          |           |          |          |              |           |
| C474fs            |            |           |           |          |          |          |          |           |           |           |          |           |          |          |              |           |
| E476fs            |            |           |           |          | 2        |          |          |           |           |           |          |           |          |          |              |           |
| C482X             | 1          |           |           |          |          |          |          |           |           | 4         |          |           |          |          |              |           |
| R493X             | 18         | 6         |           | 1        | 4        |          |          |           |           | 5         |          | 1         |          |          | 18           | 2         |
| E498fs            | 3          | 1         | 1         |          |          |          |          | 3         |           |           |          |           |          |          |              |           |
| Q503X             | 1          |           |           |          |          |          |          |           |           |           |          |           |          |          |              |           |
| R535X             |            |           |           |          |          |          |          |           |           | 1         |          |           |          |          |              |           |
| R538X             |            |           |           |          |          |          |          |           |           |           |          |           |          |          |              |           |
| <b>MAPT total</b> | <b>354</b> | <b>14</b> | <b>14</b> | <b>0</b> | <b>2</b> | <b>2</b> | <b>1</b> | <b>14</b> | <b>33</b> | <b>24</b> | <b>1</b> | <b>39</b> | <b>1</b> | <b>1</b> | <b>274</b>   | <b>17</b> |
| R5H               | 1          | 1         |           |          |          |          |          |           |           |           |          |           |          |          |              | 1         |
| R5L               |            |           |           |          |          |          |          |           | 1         |           |          |           |          |          |              |           |
| G55R              | 1          |           |           |          |          |          |          |           |           |           |          |           |          |          | 1            |           |
| K257T             | 4          |           |           |          |          |          |          |           |           |           |          |           |          |          | 1            |           |
| I260V             | 1          |           |           |          |          |          |          |           |           |           |          |           |          |          |              |           |
| L266V             | 4          |           | 1         |          |          |          |          |           |           |           |          |           |          |          | 2            | 1         |
| G271R             |            | 1         |           |          |          |          |          |           |           |           |          |           |          |          |              |           |
| G272V             | 6          |           |           |          |          |          |          |           |           |           |          |           |          |          | 4            |           |
| G273R             |            | 1         |           |          |          |          |          |           |           |           |          |           |          |          |              |           |
| IVS9-15T>C        | 1          |           |           |          |          |          |          |           |           |           |          |           |          |          |              |           |
| IVS9-11G>C        | 2          |           |           |          |          |          |          |           |           |           |          |           |          |          | 3            |           |
| IVS9-10G>C        | 2          |           |           |          |          |          |          |           |           |           |          |           |          |          | 1            |           |
| IVS9-10G>T        | 9          |           |           |          |          |          |          |           |           | 1         |          |           |          |          | 2            |           |
| N279K             | 2          |           |           |          |          |          |          |           | 6         | 2         |          | 22        |          |          | 12           |           |
| deltaK280         | 3          |           |           |          |          |          |          |           |           | 1         |          |           |          |          |              |           |
| L284L             |            |           |           |          |          |          |          |           |           |           |          |           |          |          | 7            |           |
| L284R             |            |           |           |          |          |          |          |           | 3         |           |          |           |          |          |              |           |
| S285R             |            |           |           |          |          |          |          |           | 1         |           |          |           |          |          |              |           |
| C291R             |            |           |           |          |          |          | 1        | 1         |           |           |          |           |          |          |              |           |
| N296H             | 1          |           |           |          |          |          |          |           |           |           |          |           |          |          | 3            |           |
| delN296           | 1          |           |           |          |          |          |          |           | 2         |           |          | 2         |          |          |              |           |
| N296N             | 1          |           |           |          |          |          |          | 1         | 1         |           |          |           |          |          | 3            |           |
| K298E             |            | 1         |           |          |          |          |          |           |           | 1         |          |           |          |          |              |           |
| P301T             | 2          |           |           |          |          |          |          |           |           |           |          |           |          |          | 3            |           |
| P301S             | 3          |           |           |          |          |          |          | 2         | 1         |           |          | 3         |          |          | 11           |           |

|                      | bvFTD      | nvPPA     | svPPA     | lvPPA    | PPA-NOS  | FTD-ALS    | ALS        | CBS      | PSP      | AD        | HD       | PD        | DLB      | VaD      | Dementia-NOS | Other     |
|----------------------|------------|-----------|-----------|----------|----------|------------|------------|----------|----------|-----------|----------|-----------|----------|----------|--------------|-----------|
| P301L                | 134        | 1         | 4         |          | 1        |            |            | 1        |          | 3         |          | 1         | 1        |          | 86           | 2         |
| G303V                |            |           |           |          |          |            |            |          | 6        |           |          |           |          |          |              |           |
| G304S                |            | 2         |           |          |          |            |            |          |          |           |          |           |          |          |              |           |
| S305N                | 6          |           |           |          |          |            |            |          |          | 1         |          |           |          |          | 6            | 1         |
| S305I                | 2          | 1         |           |          |          |            |            |          |          |           |          |           |          |          |              |           |
| S305S                | 2          |           |           |          |          |            |            |          | 2        |           |          | 2         |          | 1        | 2            |           |
| IVS10+3G>A           | 4          |           |           |          |          |            |            |          |          | 1         | 1        | 1         |          |          | 5            | 1         |
| IVS10+4A>C           | 1          |           |           |          |          |            |            |          |          |           |          |           |          |          |              |           |
| IVS10+11T>C          |            |           |           |          |          |            |            |          |          |           |          |           |          |          | 2            |           |
| IVS10+12C>T          | 1          |           |           |          |          |            |            |          |          |           |          |           |          |          |              |           |
| IVS10+12C>A          |            |           |           |          |          |            |            |          |          |           |          |           |          |          | 2            |           |
| IVS10+13A>G          | 1          |           |           |          |          |            |            |          |          |           |          |           |          |          | 1            |           |
| IVS10+14C>T          | 14         |           |           |          |          |            |            |          |          | 1         |          |           |          |          | 4            |           |
| IVS10+15A>C          | 4          |           |           |          |          |            |            |          |          | 1         |          |           |          |          | 1            |           |
| IVS10+16C>T          | 62         | 1         | 2         |          | 1        |            |            | 5        | 4        | 7         |          | 5         |          |          | 56           | 6         |
| IVS10+19C>G          | 1          |           |           |          |          |            |            |          |          |           |          |           |          |          |              |           |
| L315R                | 6          |           | 1         |          |          |            |            |          |          |           |          |           |          |          |              |           |
| L315L                | 3          | 2         | 1         |          |          |            |            |          |          |           |          |           |          |          | 2            |           |
| K317M                | 2          | 1         |           |          |          |            |            |          |          |           |          | 1         |          |          | 1            |           |
| S320F                | 2          |           |           |          |          |            |            |          |          |           |          |           |          |          | 1            |           |
| P332S                |            |           | 2         |          |          |            |            |          |          |           |          |           |          |          |              | 1         |
| G335S                | 1          |           |           |          |          |            |            |          |          |           |          |           |          |          |              |           |
| G335V                | 1          |           |           |          |          |            |            |          |          |           |          |           |          |          | 5            |           |
| Q336R                | 1          |           | 1         |          |          |            |            |          |          | 1         |          |           |          |          |              |           |
| Q336H                |            |           |           |          |          | 2          |            | 1        |          |           |          |           |          |          | 2            |           |
| V337M                | 16         |           |           |          |          |            |            |          |          |           |          |           |          |          | 4            |           |
| E342V                |            |           |           |          |          |            |            |          |          |           |          |           |          |          | 2            |           |
| Q351R                | 2          |           |           |          |          |            |            |          |          |           |          |           |          |          |              |           |
| S352L                |            |           |           |          |          |            |            |          |          |           |          |           |          |          |              | 2         |
| S356T                | 1          |           |           |          |          |            |            |          |          |           |          |           |          |          |              | 2         |
| V363I                |            | 1         | 2         |          |          |            |            | 1        |          |           |          |           |          |          |              |           |
| V363A                |            |           |           |          |          |            |            |          |          |           |          | 2         |          |          | 1            |           |
| P364S                | 3          |           |           |          |          |            |            |          |          |           |          |           |          |          |              |           |
| G366R                | 2          |           |           |          |          |            |            |          |          |           |          |           |          |          |              |           |
| K369I                |            |           |           |          |          |            |            |          |          | 1         |          |           |          |          |              |           |
| E372G                | 1          |           |           |          |          |            |            |          |          |           |          |           |          |          |              |           |
| G389R (2170G>A)      | 3          |           |           |          |          |            |            |          |          |           |          |           |          |          | 3            |           |
| G389R (2170G>C)      | 2          | 1         |           |          |          |            |            | 1        |          |           |          |           |          |          | 2            |           |
| R406W                | 31         |           |           |          |          |            |            |          |          | 3         |          |           |          |          | 33           |           |
| N410H                |            |           |           |          |          |            |            | 1        |          |           |          |           |          |          |              |           |
| Q424K                |            |           |           |          |          |            |            |          |          |           |          |           |          |          |              |           |
| T427M                | 1          |           |           |          |          |            |            |          |          |           |          |           |          |          |              |           |
| <b>C9orf72 total</b> | <b>450</b> | <b>26</b> | <b>13</b> | <b>3</b> | <b>4</b> | <b>157</b> | <b>276</b> | <b>2</b> | <b>1</b> | <b>84</b> | <b>4</b> | <b>15</b> | <b>5</b> | <b>7</b> | <b>362</b>   | <b>24</b> |

## Discussion

The study further supports the clinical heterogeneity of genetic FTD, identifying multiple phenotypes both within and outside the FTD spectrum in each of the mutations. Whilst bvFTD is the most common phenotype in all three genetic groups, each group has particular associations with other primary phenotypes: ALS in *C9orf72* expansions, PPA in *GRN* mutations, and parkinsonism in *MAPT* mutations. Expansions in *C9orf72* are the commonest cause of familial ALS, and exemplify the spectrum of disease across FTD/ALS with pure FTD (46% of cases here with bvFTD or PPA) and ALS (26%) at either end, and the overlapping condition of FTD-ALS (15%) in the middle – of note, the frequencies here represent the primary phenotype, and it may well have been that many patients presenting with ‘pure’ ALS or FTD went on to develop the other condition later in time. The PPA phenotype in *GRN* mutations has not been explored in detail, but this study suggests two major phenotypes, nfvPPA fitting consensus Gorno-Tempini criteria<sup>67</sup>, and a PPA syndrome not meeting criteria for any of the three major variants (PPA-NOS) – this ‘mixed’ aphasia pattern has been previously described as potentially distinctive for those with *GRN* mutations<sup>68</sup>. Whilst parkinsonism is most common in *MAPT* mutations, the phenotype is variable, often being diagnosed as either ‘PD’<sup>69</sup> (suggesting the presence of an asymmetrical akinetic-rigid syndrome), or PSP (Richardson’s syndrome)<sup>70</sup>, more commonly than CBS, a condition that was also seen in a substantial minority of people with *GRN* mutations<sup>71-73</sup>. The phenotypic heterogeneity does not seem to be particularly related to the individual mutation in the *GRN* group (apart from perhaps the A9D variant), but there was a clear distinction between the majority of the common *MAPT* mutations in which bvFTD was the most frequent syndrome, and the N279K variant where a primary parkinsonian disorder predominated.

Outside of the FTD spectrum, a number of patients were given the clinical diagnosis of Alzheimer’s disease, a diagnosis more commonly given when the AAO was older in each genetic group – this is likely to represent a number of factors including misdiagnosis (particularly in prior generations), a true amnesic presentation, which has been described in all three genetic groups<sup>74-77</sup>, and potentially in older patients, a number of ‘true’ cases of neuropathological Alzheimer’s disease occurring coincidentally. Less common phenotypes were also seen: Huntington’s disease (HD) in 4 people with *C9orf72* expansions<sup>78</sup>, Dementia with Lewy Bodies (DLB) in 4 people with *GRN* mutations and 5 people with *C9orf72* expansions (likely related to the combination of visual hallucinations and parkinsonism that can be seen in these conditions), and vascular dementia (VaD) in 9 people with *GRN* mutations (potentially related to the presence of white matter hyperintensities in a subset of people in this group<sup>79</sup>) and 7 people with *C9orf72* expansions.

## References

67. Gorno-Tempini ML, Hillis AE, Weintraub S, Kertesz A, Mendez M, Cappa SF, Ogar JM, Rohrer JD, Black S, Boeve BF, Manes F, Dronkers NF, Vandenberghe R, Rascofsky K, Patterson K, Miller BL, Knopman DS, Hodges JR, Mesulam MM, Grossman M. Classification of primary progressive aphasia and its variants. *Neurology*. 2011;76(11):1006-14.
68. Rohrer JD, Crutch SJ, Warrington EK, Warren JD. Progranulin-associated primary progressive aphasia: a distinct phenotype? *Neuropsychologia*. 2010;48(1):288-97.
69. Tsuboi Y, Uitti RJ, Delisle MB, Ferreira JJ, Brefel-Courbon C, Rascol O, Ghetti B, Murrell JR, Hutton M, Baker M, Wszolek ZK. Clinical features and disease haplotypes of individuals with the N279K tau gene mutation: a comparison of the pallidopontonigral degeneration kindred and a French family. *Arch Neurol*. 2002;59(6):943-50.
70. Rohrer JD, Paviour D, Vandrovцова J, Hodges J, de Silva R, Rossor MN. Novel L284R MAPT mutation in a family with an autosomal dominant progressive supranuclear palsy syndrome. *Neurodegener Dis*. 2011;8(3):149-52.
71. Galimberti D, Bertram K, Formica A, Fenoglio C, Cioffi SM, Arighi A, Scarpini E, Colosimo C. Plasma Screening for Progranulin Mutations in Patients with Progressive Supranuclear Palsy and Corticobasal Syndromes. *J Alzheimers Dis*. 2016;53(2):445-9.
72. Coppola C, Rossi G, Barbarulo AM, Di Fede G, Foglia C, Piccoli E, Piscosquito G, Saracino D, Tagliavini F, Cotrufo R. A progranulin mutation associated with cortico-basal syndrome in an Italian family expressing different phenotypes of fronto-temporal lobar degeneration. *Neurol Sci*. 2012;33(1):93-7.
73. Almeida MR, Baldeiras I, Ribeiro MH, Santiago B, Machado C, Massano J, Guimarães J, Resende Oliveira C, Santana I. Progranulin peripheral levels as a screening tool for the identification of subjects with progranulin mutations in a Portuguese cohort. *Neurodegener Dis*. 2014;13(4):214-23.
74. Le Ber I, Camuzat A, Hannequin D, Pasquier F, Guedj E, Rovelet-Lecrux A, Hahn-Barma V, van der Zee J, Clot F, Bakchine S, Puel M, Ghanim M, Lacomblez L, Mikol J, Deramecourt V, Lejeune P, de la Sayette V, Belliard S, Verelletto M, Meyrignac C, Van Broeckhoven C, Lambert JC, Verpillat P, Campion D, Habert MO, Dubois B, Brice A; French research network on FTD/FTD-MND. Phenotype variability in progranulin mutation carriers: a clinical, neuropsychological, imaging and genetic study. *Brain*. 2008 Mar;131(Pt 3):732-46.
75. Lindquist SG, Holm IE, Schwartz M, Law I, Stokholm J, Batbayli M, Waldemar G, Nielsen JE. Alzheimer disease-like clinical phenotype in a family with FTDP-17 caused by a MAPT R406W mutation. *Eur J Neurol*. 2008;15(4):377-85.
76. Tolboom N, Koedam EL, Schott JM, Yaqub M, Blankenstein MA, Barkhof F, Pijnenburg YA, Lammertsma AA, Scheltens P, van Berckel BN. Dementia mimicking Alzheimer's disease Owing to a tau mutation: CSF and PET findings. *Alzheimer Dis Assoc Disord*. 2010;24(3):303-7.
77. Majounie E, Abramzon Y, Renton AE, Perry R, Bassett SS, Pletnikova O, Troncoso JC, Hardy J, Singleton AB, Traynor BJ. Repeat expansion in C9ORF72 in Alzheimer's disease. *N Engl J Med*. 2012;366(3):283-4.
78. Hensman Moss DJ, Poulter M, Beck J, Hehir J, Polke JM, Campbell T, Adamson G, Mudanohwo E, McColgan P, Haworth A, Wild EJ, Sweeney MG, Houlden H, Mead S, Tabrizi SJ. C9orf72 expansions are the most common genetic cause of Huntington disease phenocopies. *Neurology*. 2014;82(4):292-9.
79. Sudre CH, Bocchetta M, Cash D, Thomas DL, Woollacott I, Dick KM, van Swieten J, Borroni B, Galimberti D, Masellis M, Tartaglia MC, Rowe JB, Graff C, Tagliavini F, Frisoni G, Laforce R Jr, Finger E, de Mendonça A, Sorbi S, Ourselin S, Cardoso MJ, Rohrer JD;



Genetic FTD Initiative, GENFI. White matter hyperintensities are seen only in *GRN* mutation carriers in the GENFI cohort. Neuroimage Clin. 2017;15:171-180.

## Section 5) Sex distribution

Sex distribution is shown in the text and in Table 1. Comparisons are shown in Supplementary Table 7.

**Supplementary Table 7: Chi-squared tests comparing sex distribution across the genetic groups**

| Comparison of genetic groups  | Chi-squared statistic | p-value |
|-------------------------------|-----------------------|---------|
| <i>MAPT</i> vs <i>GRN</i>     | 10.0442               | 0.0015  |
| <i>C9orf72</i> vs <i>GRN</i>  | 27.1048               | <0.0001 |
| <i>MAPT</i> vs <i>C9orf72</i> | 1.8114                | 0.1783  |

## Discussion

In terms of sex distribution we replicate the results of a recent meta-analysis which found an increased female:male ratio in *GRN* mutations<sup>80</sup>. One suggestion has been that this increase is due to the fact that in most populations women live longer than men and given the known age-related penetrance in *GRN*<sup>81</sup>, female mutation carriers are therefore more likely to reach an age where they develop symptoms than men. Supportive of this theory is the finding that the mean age at onset (and age at death) was significantly older in the female *GRN* group, suggesting the presence of more women developing symptoms at an older age [See Section 9 below]. Survival does not seem to be a major factor in the increased female:male ratio as there was no significant difference between men and women in disease duration in the *GRN* group. There is also age-related penetrance in *C9orf72* mutation carriers<sup>82</sup>, and this may account for the significantly older age at onset (and older age at death) in females in this group (although, unlike in *GRN* mutation carriers, we did not find any difference in frequency between the sexes). These findings in the *C9orf72* group replicate those of recent studies which showed an earlier onset in males<sup>82,83</sup>. One of these studies highlighted that bulbar onset ALS (which is more common in women) had an older AAO compared with spinal onset ALS<sup>83</sup>; however, we did not have data on the specific ALS type to investigate that further in this study.

## References

80. Curtis AF, Masellis M, Hsiung GR, Moinuddin R, Zhang K, Au B, Millett G, Mackenzie I, Rogaeva E, Tierney MC. Sex differences in the prevalence of genetic mutations in FTD and ALS: A meta-analysis. *Neurology*. 2017;89(15):1633-1642.
81. Gass J, Cannon A, Mackenzie IR, Boeve B, Baker M, Adamson J, Crook R, Melquist S, Kuntz K, Petersen R, Josephs K, Pickering-Brown SM, Graff-Radford N, Uitti R, Dickson D, Wszolek Z, Gonzalez J, Beach TG, Bigio E, Johnson N, Weintraub S, Mesulam M, White CL

- 3rd, Woodruff B, Caselli R, Hsiung GY, Feldman H, Knopman D, Hutton M, Rademakers R. Mutations in progranulin are a major cause of ubiquitin-positive frontotemporal lobar degeneration. *Hum Mol Genet.* 2006;15(20):2988-3001.
82. Murphy NA, Arthur KC, Tienari PJ, Houlden H, Chiò A, Traynor BJ. Age-related penetrance of the C9orf72 repeat expansion. *Sci Rep.* 2017;7(1):2116.
83. Van Mossevelde S, van der Zee J, Gijssels I, Slegers K, De Bleeker J, Sieben A, Vandenberghe R, Van Langenhove T, Baets J, Deryck O, Santens P, Ivanoiu A, Willems C, Bäumer V, Van den Broeck M, Peeters K, Mattheijssens M, De Jonghe P, Cras P, Martin JJ, Cruts M, De Deyn PP, Engelborghs S, Van Broeckhoven C; Belgian Neurology (BELNEU) Consortium. Clinical Evidence of Disease Anticipation in Families Segregating a C9orf72 Repeat Expansion. *JAMA Neurol.* 2017;74(4):445-452.

**Section 6) Ranges of age at onset, age at death and disease duration in each genetic group and in the individual mutations**

The mean AAO, AAD and DD in each individual mutation is shown in Supplementary Table 5 above. Supplementary Figure 2 shows the mean (black rectangle) and ranges for each of ages at onset and death, and disease duration i.e. the left-hand end of the bar is the youngest AAO and AAD, and the shortest DD, whilst the right-hand end of the bar is the oldest AAO and AAD, and the longest DD in each mutation.

**Supplementary Figure 2: Mean and range of a) ages at onset, b) ages at death, and c) disease durations for the individual *GRN* and *MAPT* mutations.** Means are shown as whole numbers, either rounded up if  $>.5$  or rounded down if  $<.5$ .

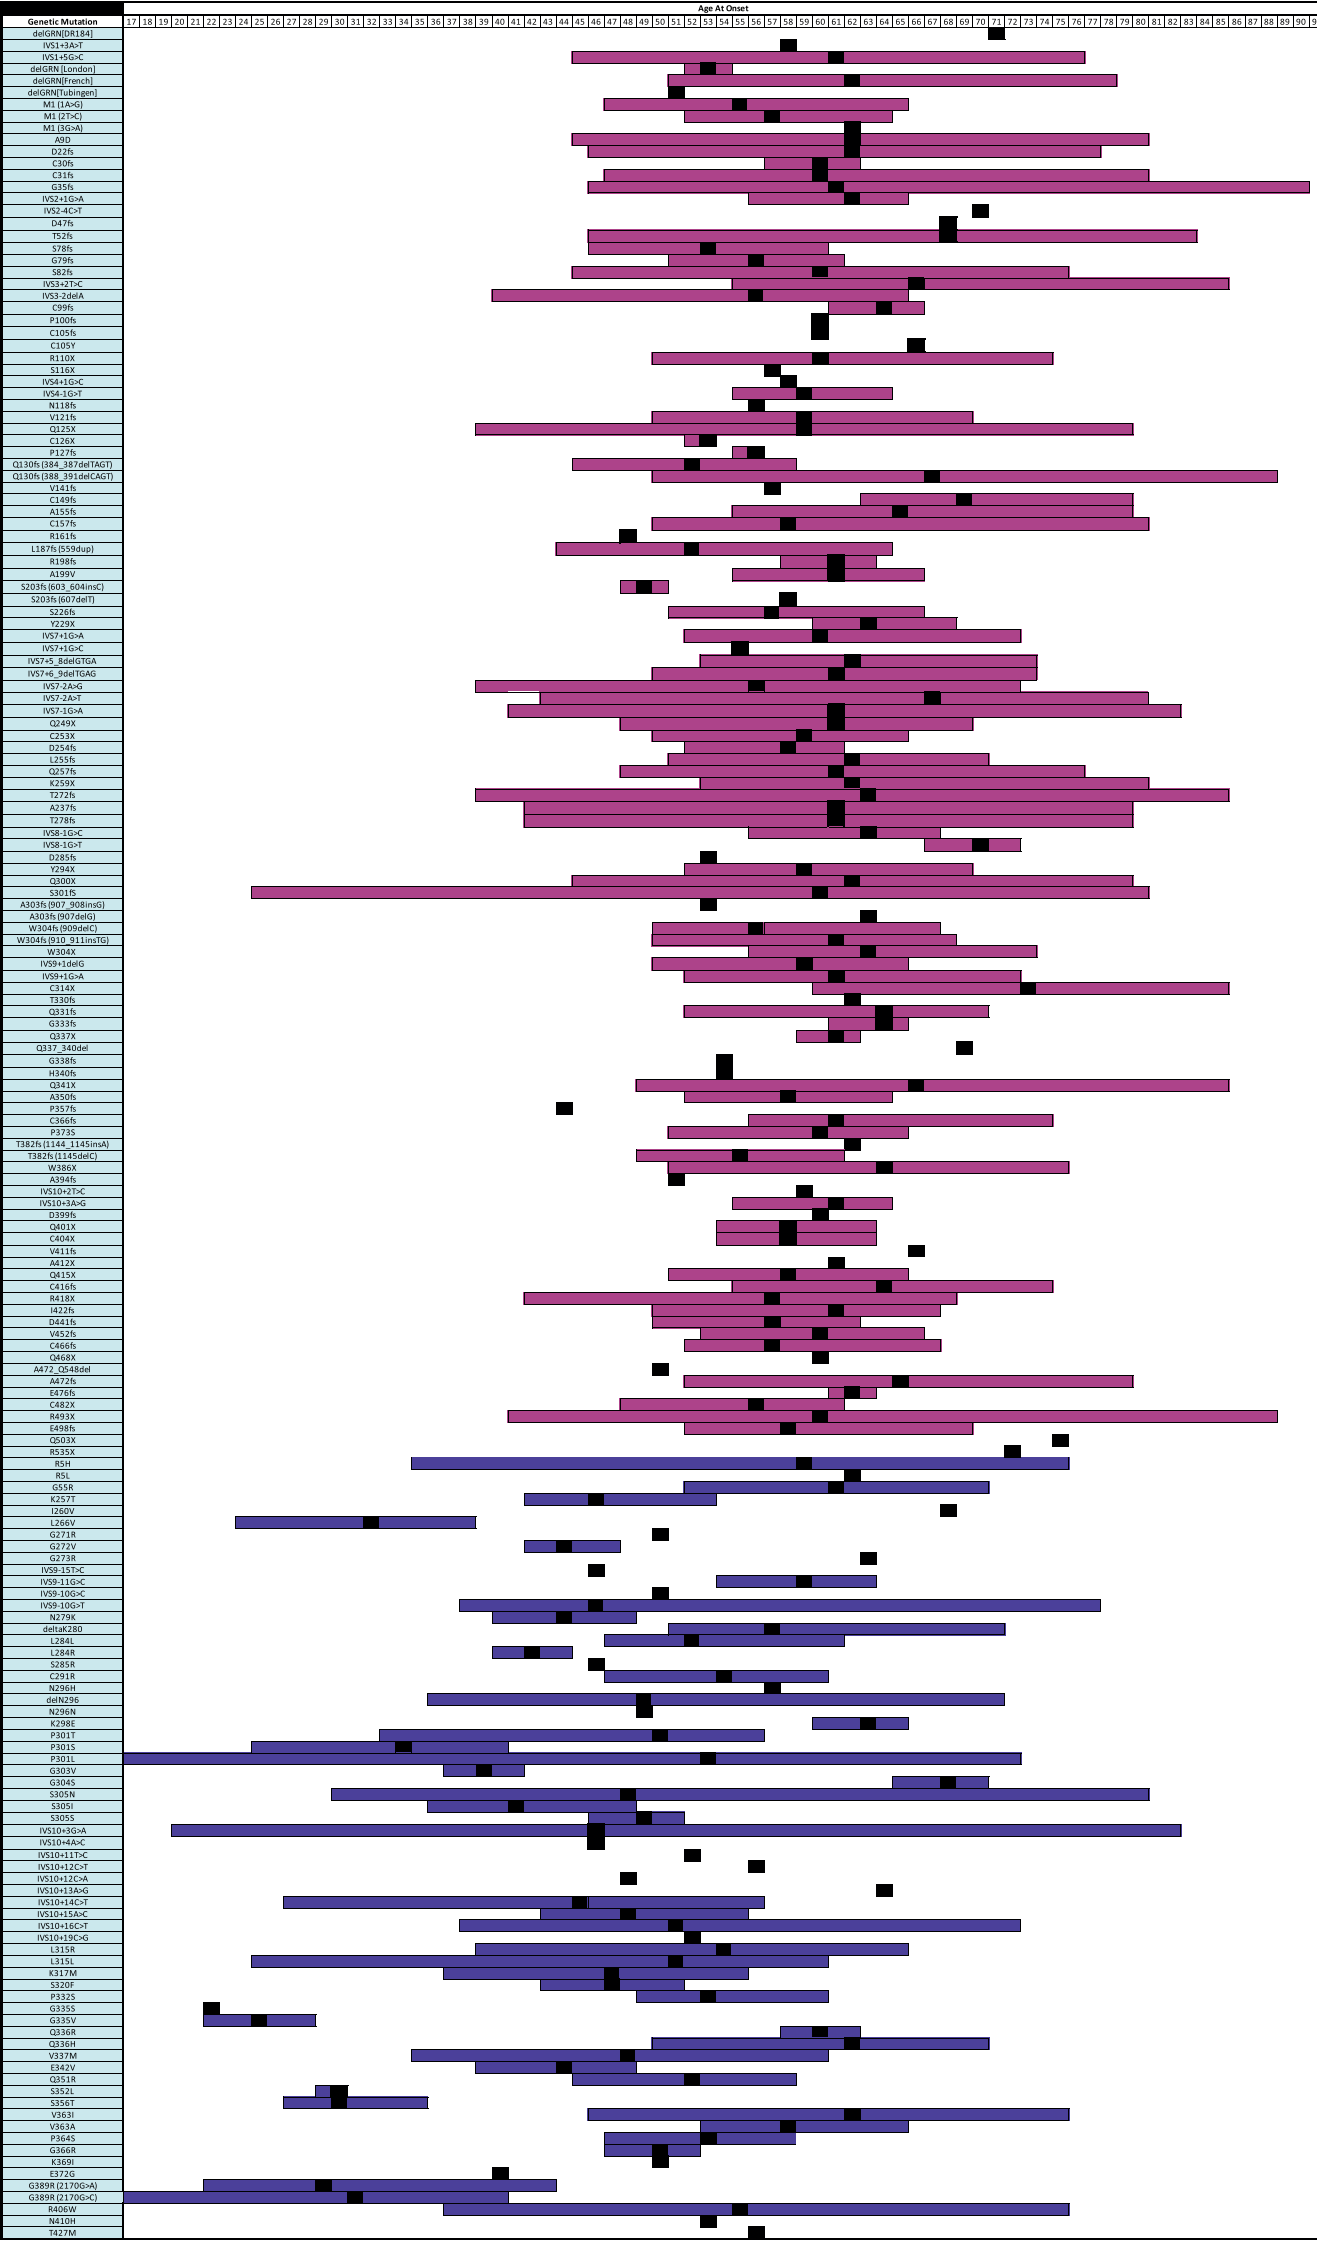

a)

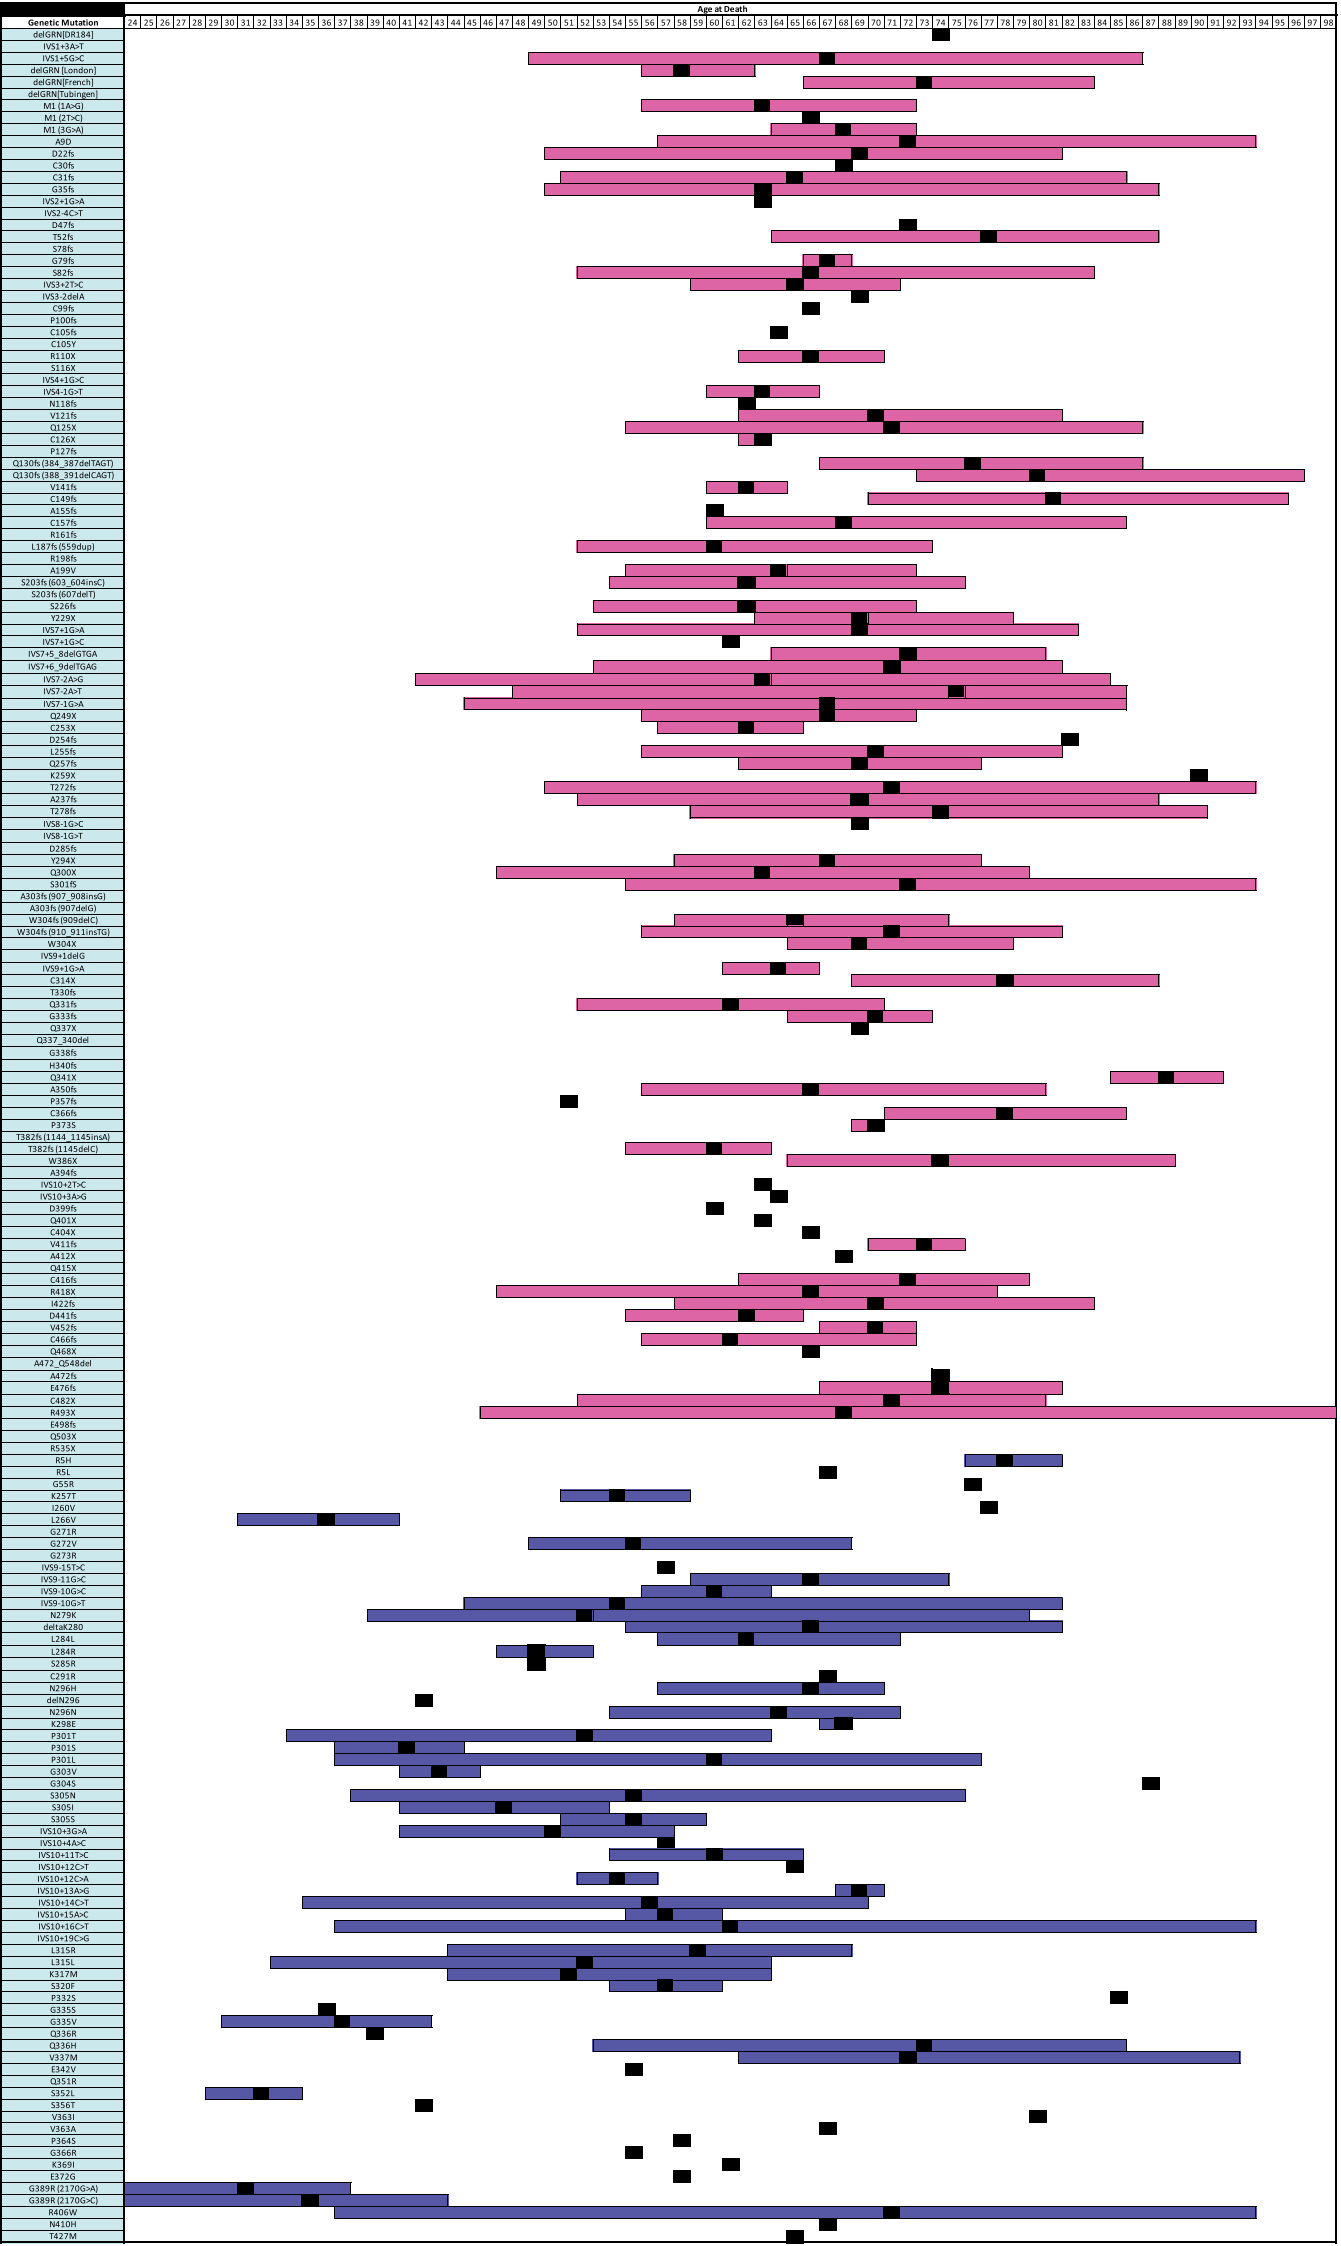

Genetic Mutation  
 delGRN(DR184)  
 IVS1+5G-C  
 delGRN(London)  
 delGRN(French)  
 delGRN(Ubragen)  
 M1(LA-G)  
 M1(2T-C)  
 M1(LS-G-N)  
 49D  
 D226  
 C305  
 C315  
 G355  
 IVS2+1G>A  
 IVS2-4C>T  
 D475  
 T526  
 S786  
 G795  
 S815  
 IVS3+2T-C  
 IVS3-2delA  
 C995  
 P1005  
 C1055  
 C105Y  
 R110X  
 S118X  
 IVS4+1G-C  
 IVS4-1G>T  
 N1185  
 V1215  
 Q125X  
 C126X  
 P1275  
 Q1305(LS88\_391delCAGT)  
 V1415  
 C1495  
 A1555  
 C1575  
 R1615  
 L1875(LS98dup)  
 R1885  
 A199V  
 S2035(603\_604insC)  
 S2035(607-608T)  
 S2265  
 V229X  
 IVS7+1G>A  
 IVS7+1G-C  
 IVS7-5\_8delGTGA  
 IVS7+6\_9delTTGAG  
 IVS7-2A>G  
 IVS7-3A>T  
 IVS7-1G>A  
 Q249X  
 C253X  
 D254H  
 L2555  
 Q2575  
 K259X  
 T2725  
 Q2775  
 T2785  
 IVS8-1G-C  
 IVS8-1G>T  
 D2855  
 V294X  
 Q300X  
 S3015  
 A3035(907\_908insG)  
 A3035(907delG)  
 W3045(909delC)  
 W3045(910\_911insTG)  
 W309X  
 IVS9+1delG  
 IVS9+1G>A  
 C318X  
 T3305  
 Q3315  
 G3335  
 Q337X  
 Q337\_240del  
 G3385  
 H3405  
 Q341X  
 A3505  
 P3575  
 C3665  
 P3735  
 T3825(L144\_1145insA)  
 T3825(1145delC)  
 W388X  
 A3945  
 IVS10+7T-C  
 IVS10+3A>G  
 D3995  
 Q401X  
 C404X  
 V4115  
 A412X  
 Q415X  
 C4165  
 R418X  
 I4225  
 D4415  
 V4525  
 C4665  
 Q468X  
 A472\_648del  
 A4725  
 E4765  
 C482X  
 R493X  
 E4985  
 Q503X  
 R535X  
 R5H  
 R5L  
 G55R  
 K257T  
 T260V  
 L266V  
 G271R  
 G272V  
 G273R  
 IVS9-1T-C  
 IVS9-11G-C  
 IVS9-10G-C  
 IVS9-10G>T  
 N279K  
 delAK280  
 L284L  
 L284K  
 S285R  
 C281R  
 N296H  
 delN296  
 N296N  
 K298E  
 P301T  
 P301S  
 P301L  
 G303V  
 G304S  
 S305N  
 S305I  
 S305S  
 IVS10+3G>A  
 IVS10+4A>C  
 IVS10+11T-C  
 IVS10+12C>T  
 IVS10+12A>A  
 IVS10+13A>G  
 IVS10+14C>T  
 IVS10+15A>C  
 IVS10+16C>T  
 IVS10+16G>G  
 L315R  
 L315L  
 K317M  
 S320P  
 P332S  
 G335S  
 G335V  
 Q336R  
 Q336H  
 V337M  
 E432V  
 Q351R  
 S352L  
 S356T  
 V363I  
 V363A  
 P364S  
 G368R  
 K369I  
 E372G  
 G389R(L2170G>A)  
 G389R(L2170G>C)  
 R401W  
 N410H  
 T427M

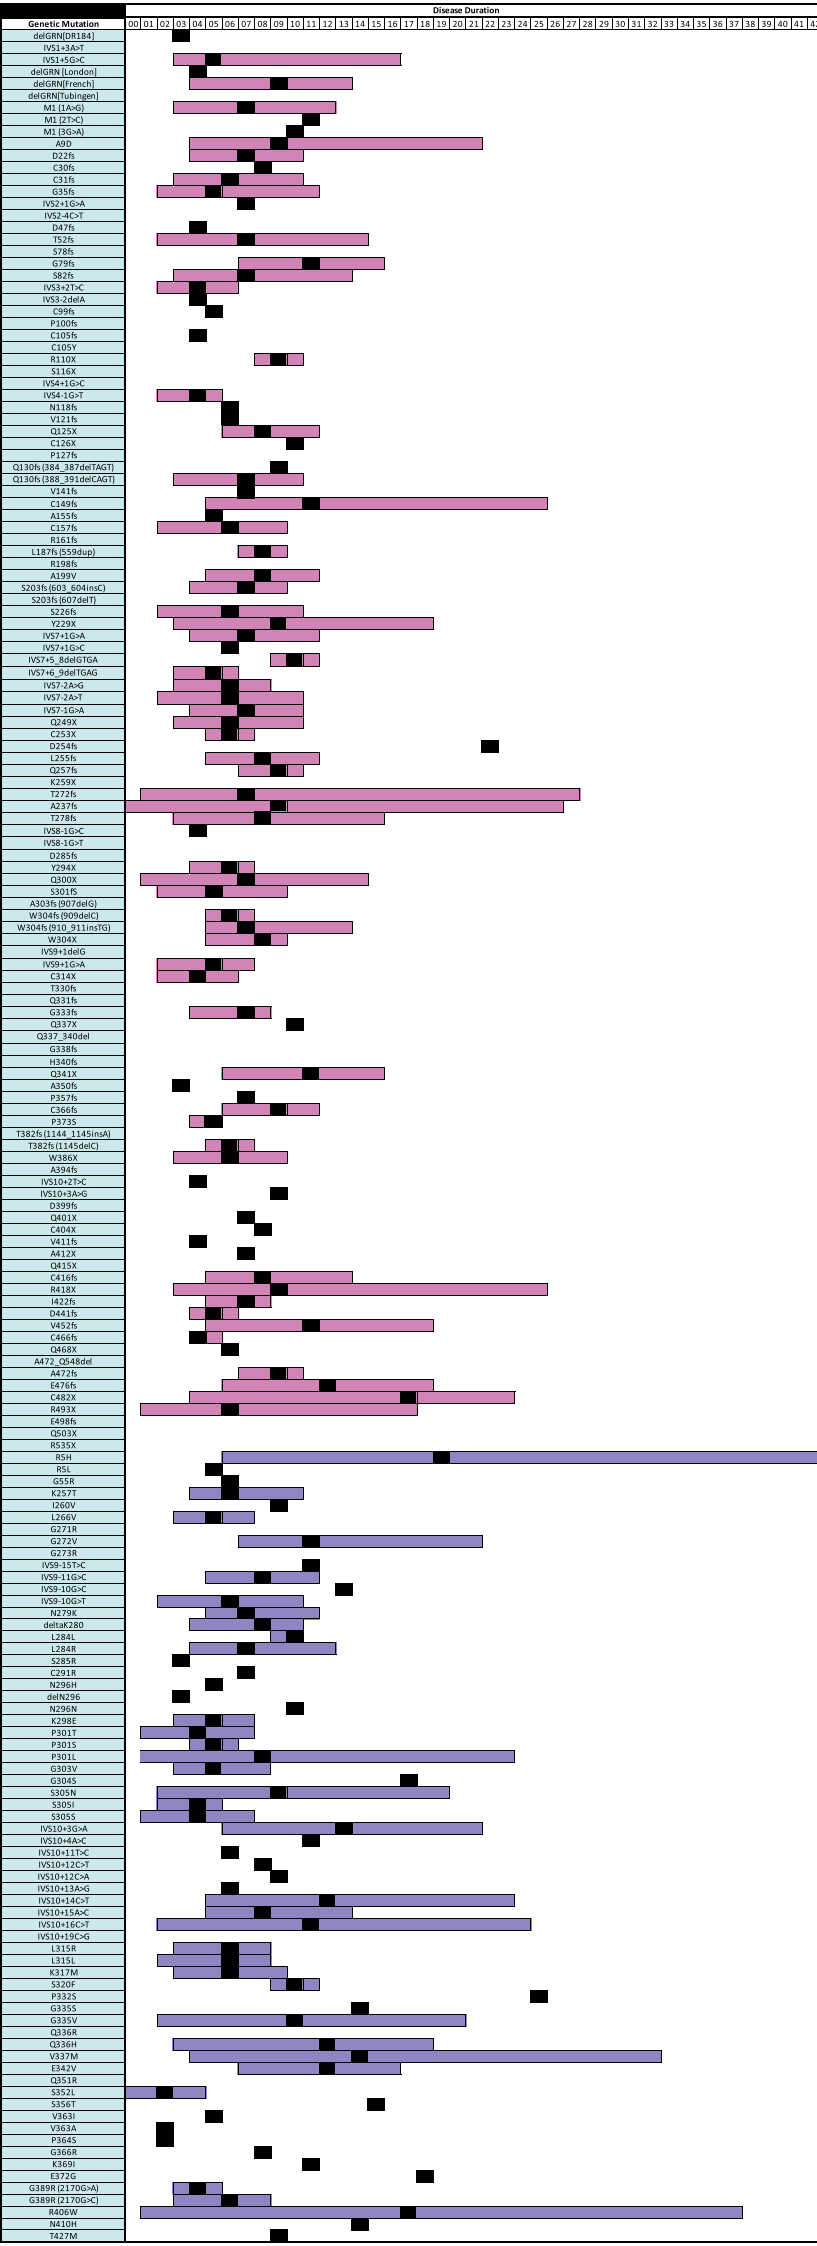

**Section 7) Cumulative percentage probability of symptom onset in the genetic groups.**

Data is shown within the main text and in Figure 3 showing the cumulative proportion of people with symptom onset by each year of age within each genetic group (*GRN*, *MAPT* and *C9orf72*) and in the common mutations (for *GRN* and *MAPT*). Data is shown in Supplementary Table 8. Comparisons of AAO as well as AAD and DD across the common mutations are shown in Supplementary Table 9.

**Supplementary Table 8: Cumulative percentage probability of symptom onset in *GRN*, *MAPT* and *C9orf72* groups overall and the common *GRN* and *MAPT* mutations [in 5 year intervals]. Mean (standard deviation) AAO for the common mutations is shown in the last row of the table.**

| Age                                      | GRN   | MAPT  | C9orf72 | GRN                    |                       |                        |                       |                       |                       | MAPT                  |                       |                       |                       |
|------------------------------------------|-------|-------|---------|------------------------|-----------------------|------------------------|-----------------------|-----------------------|-----------------------|-----------------------|-----------------------|-----------------------|-----------------------|
|                                          |       |       |         | A9D                    | C31fs                 | G35fs                  | IVS7-1G>A             | T272fs                | R493X                 | IVS10+16C>T           | N279K                 | P301L                 | R406W                 |
| 15                                       |       | 0.0   | 0.0     |                        |                       |                        |                       |                       |                       |                       |                       | 0.0                   |                       |
| 20                                       | 0.0   | 0.7   | 0.2     |                        |                       |                        |                       |                       |                       |                       |                       | 1.1                   |                       |
| 25                                       | 0.1   | 2.1   | 0.3     |                        |                       |                        |                       |                       |                       |                       |                       | 1.1                   |                       |
| 30                                       | 0.1   | 4.9   | 0.5     |                        |                       |                        |                       |                       |                       |                       | 0.0                   | 1.1                   |                       |
| 35                                       | 0.1   | 7.7   | 1.1     |                        |                       |                        |                       | 0.0                   |                       | 0.0                   | 2.8                   | 2.3                   | 0.0                   |
| 40                                       | 0.6   | 17.2  | 4.1     | 0.0                    |                       |                        | 0.0                   | 1.3                   | 0.0                   | 4.8                   | 19.4                  | 4.0                   | 5.1                   |
| 45                                       | 2.5   | 30.5  | 9.9     | 5.6                    | 0.0                   | 0.0                    | 2.6                   | 2.6                   | 2.5                   | 20.0                  | 80.6                  | 10.3                  | 7.7                   |
| 50                                       | 10.4  | 50.7  | 22.2    | 13.9                   | 9.4                   | 10.0                   | 5.3                   | 8.4                   | 15.0                  | 53.3                  | 91.7                  | 29.9                  | 17.9                  |
| 55                                       | 25.6  | 74.4  | 39.7    | 33.3                   | 25.0                  | 30.0                   | 26.3                  | 18.2                  | 30.0                  | 80.0                  | 94.4                  | 62.1                  | 64.1                  |
| 60                                       | 50.8  | 90.3  | 59.7    | 61.1                   | 62.5                  | 65.0                   | 47.4                  | 39.0                  | 65.0                  | 96.2                  | 94.4                  | 89.1                  | 82.1                  |
| 65                                       | 72.0  | 96.4  | 78.3    | 61.1                   | 75.0                  | 80.0                   | 78.9                  | 64.9                  | 75.0                  | 99.0                  | 97.2                  | 98.3                  | 92.3                  |
| 70                                       | 86.3  | 98.2  | 90.7    | 66.7                   | 90.6                  | 80.0                   | 92.1                  | 83.1                  | 92.5                  | 99.0                  | 100.0                 | 99.4                  | 94.9                  |
| 75                                       | 93.2  | 99.5  | 96.0    | 86.1                   | 93.8                  | 85.0                   | 97.4                  | 90.3                  | 95.0                  | 100.0                 |                       | 100.0                 | 100.0                 |
| 80                                       | 97.9  | 99.8  | 98.9    | 100.0                  | 100.0                 | 90.0                   | 97.4                  | 96.1                  | 97.5                  |                       |                       |                       |                       |
| 85                                       | 99.7  | 100.0 | 99.5    |                        |                       | 97.5                   | 100.0                 | 100.0                 | 97.5                  |                       |                       |                       |                       |
| 90                                       | 100.0 |       | 99.9    |                        |                       | 100.0                  |                       |                       | 100.0                 |                       |                       |                       |                       |
| 95                                       |       |       | 100.0   |                        |                       |                        |                       |                       |                       |                       |                       |                       |                       |
| <b>Mean<br/>(standard<br/>deviation)</b> |       |       |         | <b>62.1<br/>(10.6)</b> | <b>60.3<br/>(8.2)</b> | <b>61.2<br/>(10.9)</b> | <b>60.5<br/>(7.9)</b> | <b>62.7<br/>(8.9)</b> | <b>60.2<br/>(8.9)</b> | <b>50.9<br/>(6.1)</b> | <b>43.8<br/>(6.7)</b> | <b>53.0<br/>(7.4)</b> | <b>55.4<br/>(7.5)</b> |



**Supplementary Table 9: Adjusted mean differences (with 95% confidence intervals) in age at onset (AAO), age at death (AAD) and disease duration (DD – natural log differences) comparing the common individual GRN and MAPT mutations.**

|            | GRN                                                                                                                                                                                                                                                                                                                                                                                                                                                                                                                                                                                                                                                                                                                                                                                                                                                                                   | MAPT                                                                                                                                                                                                                                                                                                                                                             |
|------------|---------------------------------------------------------------------------------------------------------------------------------------------------------------------------------------------------------------------------------------------------------------------------------------------------------------------------------------------------------------------------------------------------------------------------------------------------------------------------------------------------------------------------------------------------------------------------------------------------------------------------------------------------------------------------------------------------------------------------------------------------------------------------------------------------------------------------------------------------------------------------------------|------------------------------------------------------------------------------------------------------------------------------------------------------------------------------------------------------------------------------------------------------------------------------------------------------------------------------------------------------------------|
| <b>AAO</b> | <p>A9D vs C31fs: 1.7 (-5.1, 8.6), p = 0.6151</p> <p>A9D vs G35fs: 4.7 (-2.1, 11.5), p = 0.1750</p> <p>A9D vs IVS7-IG&gt;A: 1.8 (-4.8, 8.4), p = 0.5970</p> <p>A9D vs T272fs: 4.0 (-1.9, 9.9), p = 0.1860</p> <p>A9D vs R493X: 0.6 (-5.9, 7.2), p = 0.8525</p> <p>C31fs vs G35fs: 2.9 (-2.3, 8.2), p = 0.2700</p> <p>C31fs vs IVS7-IG&gt;A: 0.03 (-4.9, 5.0), p = 0.9914</p> <p>C31fs vs T272fs: 2.2 (-1.8, 6.3), p = 0.2770</p> <p>C31fs vs R493X: -1.1 (-6.0, 3.8), p = 0.6522</p> <p>G35fs vs IVS7-IG&gt;A: -2.9 (-7.8, 2.0), p = 0.2458</p> <p>G35fs vs T272fs: -0.7 (-4.7, 3.3), p = 0.7284</p> <p>G35fs vs R493X: -4.1 (-8.9, 0.8), p = 0.1005</p> <p>IVS7-IG&gt;A vs T272fs: 2.2 (-1.4, 5.8), p = 0.2327</p> <p>IVS7-IG&gt;A vs R493X: -1.2 (-5.7, 3.4), p = 0.6210</p> <p>T272fs vs R493X: -3.4 (-6.9, 0.2), p = 0.0625</p>                                                    | <p>IVS10+16C&gt;T vs N279K: -5.9 (-9.7, -2.1), p = 0.0026</p> <p>IVS10+16C&gt;T vs P301L: 0.9 (-1.5, 3.3), p = 0.4736</p> <p>IVS10+16C&gt;T vs R406W: 3.7 (-0.6, 8.0), p = 0.0943</p> <p>N279K vs P301L: 6.8 (3.0, 10.5), p = 0.0004</p> <p>N279K vs R406W: 9.6 (4.4, 14.8), p = 0.0003</p> <p>P301L vs R406W: 2.8 (-1.4, 7.1), p = 0.1934</p>                   |
| <b>AAD</b> | <p>A9D vs C31fs: -5.4 (-12.0, 1.2), p = 0.1109</p> <p>A9D vs G35fs: -7.0 (-13.6, -0.3), p = 0.0414</p> <p>A9D vs IVS7-IG&gt;A: -4.0 (-10.7, 2.8), p = 0.2489</p> <p>A9D vs T272fs: 0.3 (-5.6, 6.2), p = 0.9136</p> <p>A9D vs R493X: -3.8 (-10.0, 2.5), p = 0.2428</p> <p>C31fs vs G35fs: -1.6 (-7.0, 3.9), p = 0.5750</p> <p>C31fs vs IVS7-IG&gt;A: 1.3 (-4.1, 7.0), p = 0.6099</p> <p>C31fs vs T272fs: 5.7 (1.2, 10.1), p = 0.0123</p> <p>C31fs vs R493X: 1.6 (-3.4, 6.6), p = 0.5203</p> <p>G35fs vs IVS7-IG&gt;A: 3.0 (-2.6, 8.6), p = 0.2923</p> <p>G35fs vs T272fs: 7.3 (2.7, 11.8), p = 0.0018</p> <p>G35fs vs R493X: 3.2 (-1.9, 8.3), p = 0.2157</p> <p>IVS7-IG&gt;A vs T272fs: 4.3 (-0.3, 8.9), p = 0.0690</p> <p>IVS7-IG&gt;A vs R493X: 0.2 (-4.9, 5.3), p = 0.9386</p> <p>T272fs vs R493X: -4.1 (-8.0, -0.1), p = 0.0440</p>                                                | <p>IVS10+16C&gt;T vs N279K: -7.3 (-11.5, -3.2), p = 0.0005</p> <p>IVS10+16C&gt;T vs P301L: -1.2 (-4.1, 1.6), p = 0.3955</p> <p>IVS10+16C&gt;T vs R406W: 9.2 (4.2, 14.1), p = 0.0003</p> <p>N279K vs P301L: 6.1 (2.0, 10.1), p = 0.0031</p> <p>N279K vs R406W: 16.5 (10.8, 22.1), p = &lt;0.0001</p> <p>P301L vs R406W: 10.4 (5.6, 15.2), p = &lt;0.0001</p>      |
| <b>DD</b>  | <p>A9D vs C31fs: -0.38 (-0.77, 0.01), p = 0.0543</p> <p>A9D vs G35fs: -0.55 (-0.94, -0.16), p = 0.0056</p> <p>A9D vs IVS7-IG&gt;A: -0.29 (-0.69, 0.10), p = 0.1493</p> <p>A9D vs T272fs: -0.38 (-0.73, -0.03), p = 0.0328</p> <p>A9D vs R493X: -0.46 (-0.84, -0.08), p = 0.0180</p> <p>C31fs vs G35fs: -0.17 (-0.48, 0.15), p = 0.3037</p> <p>C31fs vs IVS7-IG&gt;A: 0.10 (-0.22, 0.41), p = 0.5568</p> <p>C31fs vs T272fs: 0.004 (-0.26, 0.27), p = 0.9739</p> <p>C31fs vs R493X: -0.07 (-0.38, 0.23), p = 0.6301</p> <p>G35fs vs IVS7-IG&gt;A: 0.26 (-0.05, 0.58), p = 0.1054</p> <p>G35fs vs T272fs: 0.17 (-0.09, 0.43), p = 0.2016</p> <p>G35fs vs R493X: 0.09 (-0.21, 0.39), p = 0.5567</p> <p>IVS7-IG&gt;A vs T272fs: -0.09 (-0.36, 0.17), p = 0.5004</p> <p>IVS7-IG&gt;A vs R493X: -0.17 (-0.48, 0.14), p = 0.2743</p> <p>T272fs vs R493X: -0.08 (-0.33, 0.17), p = 0.5309</p> | <p>IVS10+16C&gt;T vs N279K: -0.20 (-0.51, 0.10), p = 0.1933</p> <p>IVS10+16C&gt;T vs P301L: -0.25 (-0.46, -0.03), p = 0.0223</p> <p>IVS10+16C&gt;T vs R406W: 0.33 (-0.02, 0.69), p = 0.0633</p> <p>N279K vs P301L: -0.04 (-0.34, 0.25), p = 0.7694</p> <p>N279K vs R406W: 0.54 (0.13, 0.94), p = 0.0198</p> <p>P301L vs R406W: 0.58 (0.24, 0.92), p = 0.0009</p> |

**Section 8) Generational analysis**

In order to investigate potential anticipation and differences in AAO between generations, we used a mixed effect model to perform a subanalysis investigating families with two generations of AAO data (insufficient data being unavailable to explore three or more generations). Results are shown in the main text, in Supplementary Table 10 and in Supplementary Figure 3.

**Supplementary Table 10: Cumulative percentage probability of symptom onset in GRN, MAPT and C9orf72 group generational analysis – generation 1 (earlier), generation 2 (later). N is the number of people in each group. In the bottom row adjusted mean differences between generation 1 and 2 are shown with 95% confidence intervals.**

| Age                                                                         | GRN                            |              | MAPT                          |              | C9orf72                        |              |
|-----------------------------------------------------------------------------|--------------------------------|--------------|-------------------------------|--------------|--------------------------------|--------------|
|                                                                             | Generation 1                   | Generation 2 | Generation 1                  | Generation 2 | Generation 1                   | Generation 2 |
| <b>N</b>                                                                    | 211                            | 278          | 129                           | 195          | 216                            | 225          |
| <b>15</b>                                                                   |                                |              |                               | 0.0          |                                |              |
| <b>20</b>                                                                   |                                |              | 0.0                           | 0.5          |                                |              |
| <b>25</b>                                                                   |                                |              | 0.8                           | 1.0          |                                | 0.0          |
| <b>30</b>                                                                   |                                |              | 3.1                           | 4.6          | 0.0                            | 0.4          |
| <b>35</b>                                                                   | 0.0                            | 0.0          | 5.4                           | 7.7          | 0.5                            | 1.8          |
| <b>40</b>                                                                   | 0.5                            | 1.1          | 13.2                          | 18.5         | 3.7                            | 7.1          |
| <b>45</b>                                                                   | 1.4                            | 2.5          | 25.6                          | 30.8         | 6.0                            | 14.2         |
| <b>50</b>                                                                   | 4.7                            | 12.9         | 42.6                          | 49.2         | 16.7                           | 28.0         |
| <b>55</b>                                                                   | 11.4                           | 28.8         | 67.4                          | 76.9         | 25.9                           | 45.8         |
| <b>60</b>                                                                   | 34.6                           | 54.3         | 89.9                          | 88.2         | 47.2                           | 65.3         |
| <b>65</b>                                                                   | 56.9                           | 71.9         | 95.3                          | 96.4         | 63.9                           | 82.2         |
| <b>70</b>                                                                   | 76.8                           | 85.6         | 97.7                          | 97.9         | 81.0                           | 92.9         |
| <b>75</b>                                                                   | 85.8                           | 92.4         | 99.2                          | 99.0         | 87.0                           | 97.3         |
| <b>80</b>                                                                   | 93.8                           | 99.3         | 99.2                          | 100.0        | 95.8                           | 99.1         |
| <b>85</b>                                                                   | 99.1                           | 100.0        | 100.0                         |              | 98.1                           | 100.0        |
| <b>90</b>                                                                   | 100.0                          |              |                               |              | 99.5                           |              |
| <b>95</b>                                                                   |                                |              |                               |              | 100.0                          |              |
| <b>Adjusted mean difference<br/>(95% confidence intervals),<br/>p-value</b> | -4.9 (-6.4, -3.5), p = <0.0001 |              | -2.2 (-3.8, -0.5), p = 0.0106 |              | -5.7 (-7.5, -4.0). p = <0.0001 |              |

**Supplementary Figure 3: Generational analysis of age at onset in a) GRN, b) MAPT and c) C9orf72 groups – generation 1 (earlier), generation 2 (later).**

**a) GRN mutation carriers**

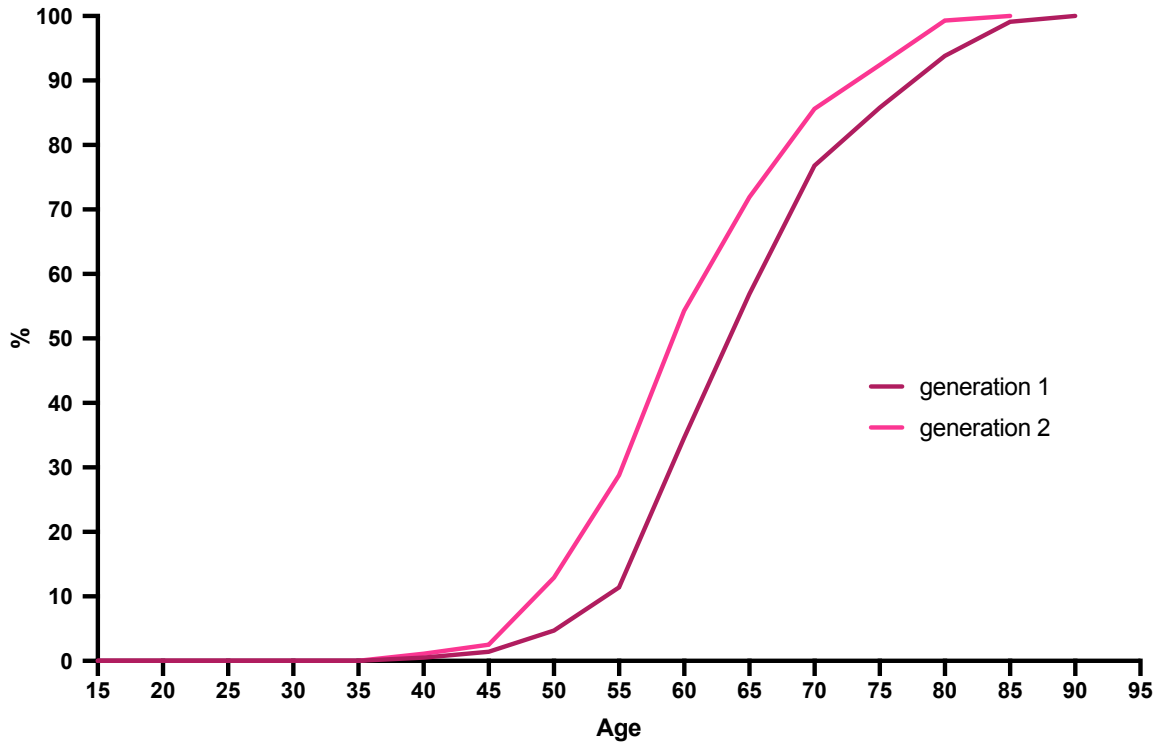

**b) MAPT expansion carriers**

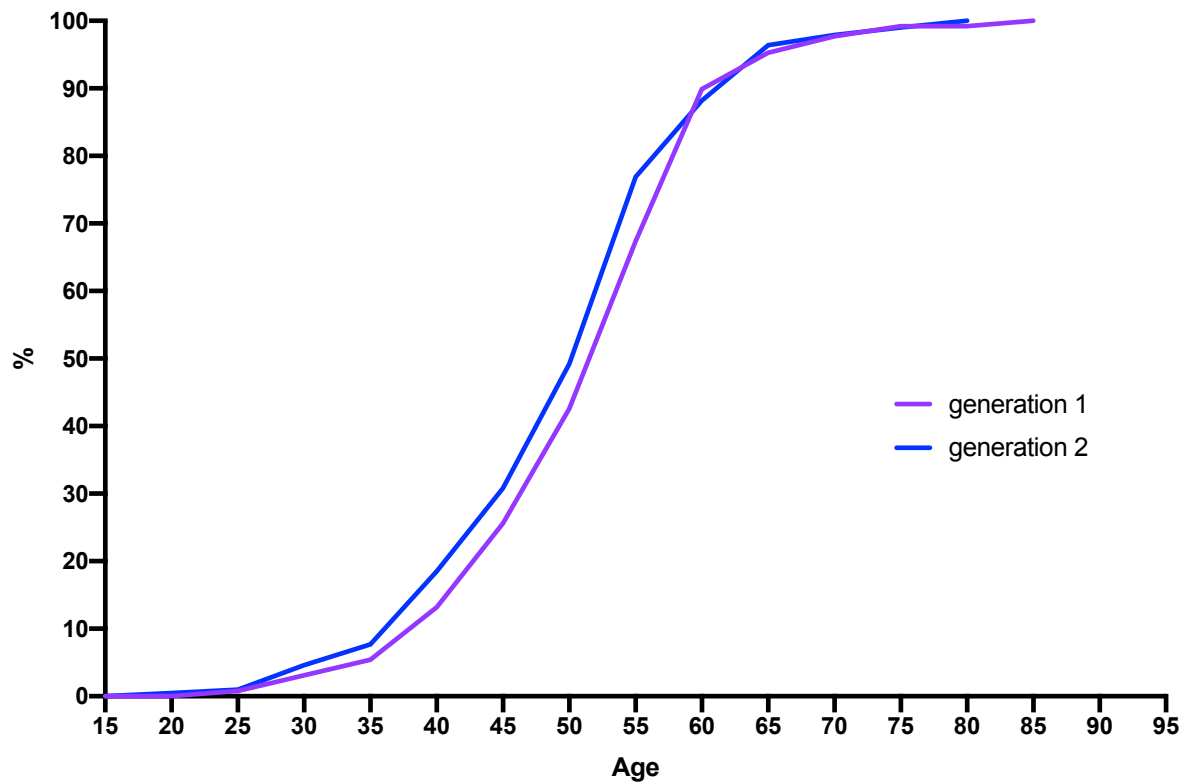

c) *C9orf72* mutation carriers

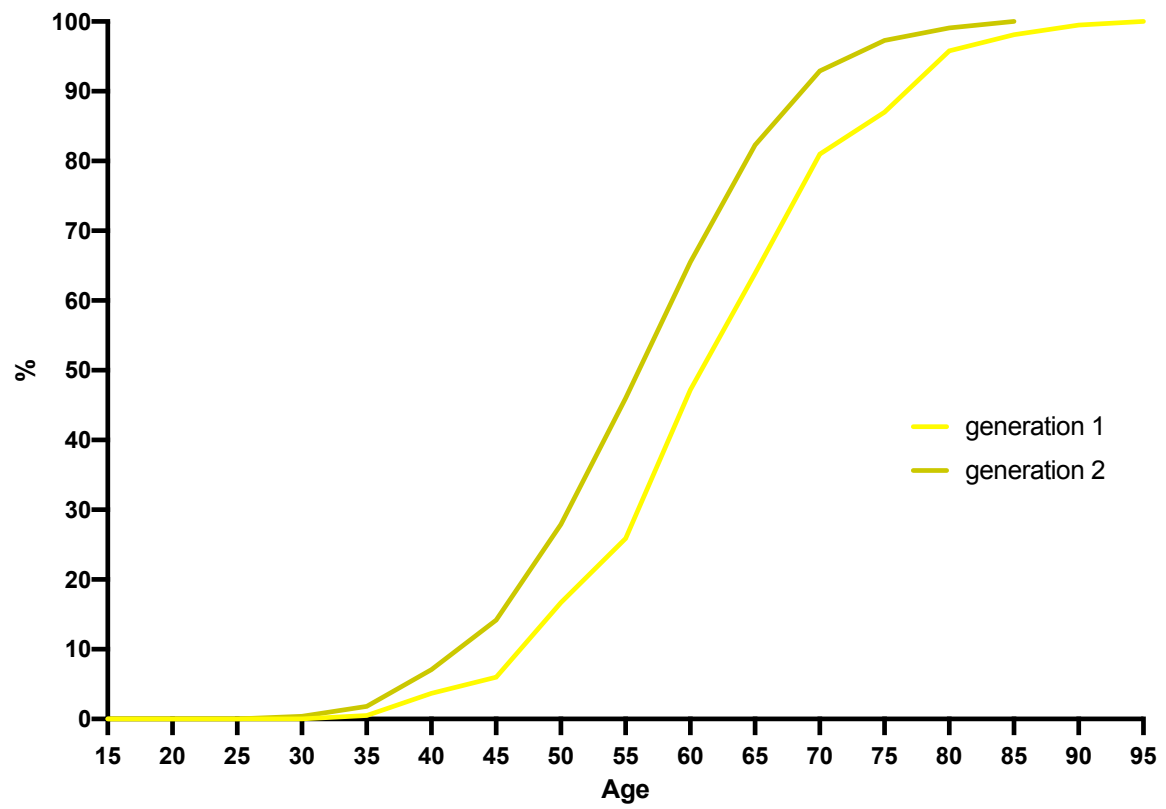

### Section 9) Sex analysis

Analyses were performed *within* genetic groups comparing male and female sex. Data is shown in the main text and in Supplementary Table 11.

**Supplementary Table 11: Age at onset (AAO), age at death (AAD) and disease duration (DD) in each genetic group by sex. In the bottom row adjusted mean differences (natural log differences for DD) between female and male sex are shown with 95% confidence intervals.**

|                                                                                 |     | <b>GRN</b>                      | <b>MAPT</b>                     | <b>C9orf72</b>                  |
|---------------------------------------------------------------------------------|-----|---------------------------------|---------------------------------|---------------------------------|
| <b>Male</b>                                                                     | AAO | 60.5 (8.3)                      | 49.1 (10.2)                     | 57.7 (10.0)                     |
|                                                                                 | AAD | 67.8 (8.8)                      | 58.1 (10.5)                     | 64.6 (10.8)                     |
|                                                                                 | DD  | 7.0 (3.6)                       | 8.8 (5.9)                       | 6.5 (5.1)                       |
| <b>Female</b>                                                                   | AAO | 61.8 (9.2)                      | 49.9 (9.8)                      | 58.9 (9.6)                      |
|                                                                                 | AAD | 69.4 (10.2)                     | 59.0 (12.0)                     | 66.1 (11.0)                     |
|                                                                                 | DD  | 7.1 (4.1)                       | 9.7 (6.9)                       | 6.4 (4.5)                       |
| <b>Adjusted mean difference<br/>(95% confidence<br/>intervals),<br/>p-value</b> | AAO | -1.3 (-2.4, -0.2), p = 0.0190   | -0.8 (-2.1, 0.5), p = 0.2539    | -1.2 (-2.4, -0.1), p = 0.0406   |
|                                                                                 | AAD | -1.6 (-3.1, -0.2), p = 0.0290   | -1.1 (-2.5, 0.4), p = 0.1642    | -1.6 (-3.0, -0.1), p = 0.0338   |
|                                                                                 | DD  | -0.02 (-0.10, 0.07), p = 0.7162 | -0.08 (-0.21, 0.04), p = 0.1870 | -0.04 (-0.17, 0.09), p = 0.5240 |

### Section 10) Phenotype analysis

Analyses were performed *within* groups comparing the main phenotypes. Data is shown in the main text and in Supplementary Table 12.

**Supplementary Table 12: Age at onset (AAO), age at death (AAD) and disease duration (DD) in each genetic group by phenotype [where sufficient data was available; N/A = not applicable, when not enough data]. Atypical parkinsonism (AP) = CBS for GRN mutation carriers and a combined CBS/PSP cohort for MAPT mutation carriers. In the bottom row adjusted mean differences between phenotypes are shown with 95% confidence intervals.**

|                                                                     |     | GRN                                                                                                                                                                                                                                                                      | MAPT                                                                                                                                                                                                                                                                    | C9orf72                                                                                                                                                                                                                                                                                                                                                                                                                                                                      |
|---------------------------------------------------------------------|-----|--------------------------------------------------------------------------------------------------------------------------------------------------------------------------------------------------------------------------------------------------------------------------|-------------------------------------------------------------------------------------------------------------------------------------------------------------------------------------------------------------------------------------------------------------------------|------------------------------------------------------------------------------------------------------------------------------------------------------------------------------------------------------------------------------------------------------------------------------------------------------------------------------------------------------------------------------------------------------------------------------------------------------------------------------|
| bvFTD                                                               | AAO | 59.6 (8.1)                                                                                                                                                                                                                                                               | 50.5 (9.0)                                                                                                                                                                                                                                                              | 56.7 (9.0)                                                                                                                                                                                                                                                                                                                                                                                                                                                                   |
|                                                                     | AAD | 66.3 (9.3)                                                                                                                                                                                                                                                               | 60.6 (9.9)                                                                                                                                                                                                                                                              | 64.6 (9.0)                                                                                                                                                                                                                                                                                                                                                                                                                                                                   |
|                                                                     | DD  | 7.1 (3.7)                                                                                                                                                                                                                                                                | 10.2 (6.2)                                                                                                                                                                                                                                                              | 7.8 (4.4)                                                                                                                                                                                                                                                                                                                                                                                                                                                                    |
| PPA                                                                 | AAO | 60.2 (7.7)                                                                                                                                                                                                                                                               | 52.4 (12.0)                                                                                                                                                                                                                                                             | 59.7 (7.4)                                                                                                                                                                                                                                                                                                                                                                                                                                                                   |
|                                                                     | AAD | 66.6 (7.8)                                                                                                                                                                                                                                                               | 60.9 (15.2)                                                                                                                                                                                                                                                             | 65.5 (6.5)                                                                                                                                                                                                                                                                                                                                                                                                                                                                   |
|                                                                     | DD  | 6.5 (2.8)                                                                                                                                                                                                                                                                | 9.1 (4.1)                                                                                                                                                                                                                                                               | 7.5 (4.8)                                                                                                                                                                                                                                                                                                                                                                                                                                                                    |
| FTD-ALS                                                             | AAO | N/A                                                                                                                                                                                                                                                                      | N/A                                                                                                                                                                                                                                                                     | 57.8 (8.3)                                                                                                                                                                                                                                                                                                                                                                                                                                                                   |
|                                                                     | AAD | N/A                                                                                                                                                                                                                                                                      | N/A                                                                                                                                                                                                                                                                     | 62.1 (8.9)                                                                                                                                                                                                                                                                                                                                                                                                                                                                   |
|                                                                     | DD  | N/A                                                                                                                                                                                                                                                                      | N/A                                                                                                                                                                                                                                                                     | 5.0 (4.2)                                                                                                                                                                                                                                                                                                                                                                                                                                                                    |
| ALS                                                                 | AAO | N/A                                                                                                                                                                                                                                                                      | N/A                                                                                                                                                                                                                                                                     | 57.0 (9.0)                                                                                                                                                                                                                                                                                                                                                                                                                                                                   |
|                                                                     | AAD | N/A                                                                                                                                                                                                                                                                      | N/A                                                                                                                                                                                                                                                                     | 59.2 (9.7)                                                                                                                                                                                                                                                                                                                                                                                                                                                                   |
|                                                                     | DD  | N/A                                                                                                                                                                                                                                                                      | N/A                                                                                                                                                                                                                                                                     | 2.9 (2.8)                                                                                                                                                                                                                                                                                                                                                                                                                                                                    |
| AP                                                                  | AAO | 57.7 (7.3)                                                                                                                                                                                                                                                               | 44.9 (7.8)                                                                                                                                                                                                                                                              | N/A                                                                                                                                                                                                                                                                                                                                                                                                                                                                          |
|                                                                     | AAD | 66.3 (7.5)                                                                                                                                                                                                                                                               | 52.8 (8.9)                                                                                                                                                                                                                                                              | N/A                                                                                                                                                                                                                                                                                                                                                                                                                                                                          |
|                                                                     | DD  | 8.2 (5.7)                                                                                                                                                                                                                                                                | 7.2 (4.0)                                                                                                                                                                                                                                                               | N/A                                                                                                                                                                                                                                                                                                                                                                                                                                                                          |
| AD                                                                  | AAO | 66.4 (8.1)                                                                                                                                                                                                                                                               | 56.7 (11.1)                                                                                                                                                                                                                                                             | 65.1 (10.6)                                                                                                                                                                                                                                                                                                                                                                                                                                                                  |
|                                                                     | AAD | 73.6 (8.2)                                                                                                                                                                                                                                                               | 66.4 (9.5)                                                                                                                                                                                                                                                              | 73.9 (9.3)                                                                                                                                                                                                                                                                                                                                                                                                                                                                   |
|                                                                     | DD  | 7.8 (4.9)                                                                                                                                                                                                                                                                | 10.2 (6.2)                                                                                                                                                                                                                                                              | 10.4 (4.9)                                                                                                                                                                                                                                                                                                                                                                                                                                                                   |
| <b>Adjusted mean difference (95% confidence intervals), p-value</b> | AAO | PPA vs bvFTD: 1.1 (-0.4, 2.6), p = 0.1502<br>bvFTD vs AP: 1.3 (-1.1, 3.8), p = 0.2916<br>bvFTD vs AD: -7.7 (-9.7, -5.7), p = <0.0001<br>PPA vs AP: 2.4 (-0.2, 5.1), p = 0.0729<br>PPA vs AD: -6.6 (-8.8, -4.4), p = <0.0001<br>AP vs AD: -9.0 (-12.0, -6.1), p = <0.0001 | PPA vs bvFTD: 0.6 (-2.9, 4.0), p = 0.7416<br>bvFTD vs AP: 4.1 (0.9, 7.4), p = 0.0132<br>bvFTD vs AD: -7.0 (-11.0, -3.0), p = 0.0006<br>PPA vs AP: 4.7 (0.3, 9.1), p = 0.0365<br>PPA vs AD: -6.4 (-11.5, -1.4), p = 0.0127<br>AP vs AD: -11.1 (-16.1, -6.2), p = <0.0001 | PPA vs bvFTD: 3.1 (0.3, 5.8), p = 0.0277<br>FTD-ALS vs bvFTD: 1.0 (-0.7, 2.7), p = 0.2370<br>ALS vs bvFTD: 0.3 (-1.2, 1.8), p = 0.7096<br>bvFTD vs AD: -7.8 (-10.4, -5.2), p = <0.0001<br>PPA vs FTD-ALS: 2.1 (-0.9, 5.1), p = 0.1721<br>PPA vs ALS: 2.8 (-0.1, 5.7), p = 0.0575<br>PPA vs AD: -4.7 (-8.3, -1.1), p = 0.0098<br>ALS vs FTD-ALS: -0.7, (-2.6, 1.2), p = 0.4490<br>FTD-ALS vs AD: -6.8 (-9.6, -4.0), p = <0.0001<br>ALS vs AD: -7.5 (-10.4, -5.2), p = <0.0001 |

|  |     |                                                                                                                                                                                                                                                                                         |                                                                                                                                                                                                                                                                                     |                                                                                                                                                                                                                                                                                                                                                                                                                                                                                                                  |
|--|-----|-----------------------------------------------------------------------------------------------------------------------------------------------------------------------------------------------------------------------------------------------------------------------------------------|-------------------------------------------------------------------------------------------------------------------------------------------------------------------------------------------------------------------------------------------------------------------------------------|------------------------------------------------------------------------------------------------------------------------------------------------------------------------------------------------------------------------------------------------------------------------------------------------------------------------------------------------------------------------------------------------------------------------------------------------------------------------------------------------------------------|
|  | AAD | PPA vs bvFTD: 1.1 (-1.3, 3.4), p = 0.3766<br>bvFTD vs AP: -0.7 (-4.4, 3.1), p = 0.7166<br>bvFTD vs AD: -8.2 (-10.8, -5.5), p = <0.0001<br>PPA vs AP: 0.4 (-3.7, 4.4), p = 0.8607<br>PPA vs AD: -7.1 (-10.1, -4.1), p = <0.0001<br>AP vs AD: -7.5 (-11.7, -3.2), p = 0.0006              | PPA vs bvFTD: 1.8 (-3.5, 7.2), p = 0.4962<br>bvFTD vs AP: 4.8 (0.5, 9.1), p = 0.0300<br>bvFTD vs AD: -8.9 (-14.0, -3.9), p = 0.0005<br>PPA vs AP: 6.6 (0.4, 12.9), p = 0.0363<br>PPA vs AD: -7.1 (-14.0, -0.1), p = 0.0457<br>AP vs AD: -13.7 (-20.1, -7.4), p = <0.0001            | PPA vs bvFTD: 0.8 (-3.2, 4.8), p = 0.6933<br>FTD-ALS vs bvFTD: -2.8 (-5.0, -0.6), p = 0.0137<br>ALS vs bvFTD: -5.6 (-7.4, -3.8), p = <0.0001<br>bvFTD vs AD: -8.8 (-11.8, -5.9), p = <0.0001<br>PPA vs FTD-ALS: 3.6 (-0.6, 7.8), p = 0.0964<br>PPA vs ALS: 6.4 (2.4, 10.5), p = 0.0019<br>PPA vs AD: -8.0 (-12.7, -3.4), p = 0.0007<br>ALS vs FTD-ALS: -2.8, (-5.1, -0.6), p = 0.0141<br>FTD-ALS vs AD: -11.6 (-14.9, -8.4), p = <0.0001<br>ALS vs AD: -14.5 (-17.4, -11.5), p = <0.0001                         |
|  | DD  | PPA vs bvFTD: -0.03, (-0.17, 0.11), p = 0.6621<br>bvFTD vs AP: -0.04 (-0.28, 0.19), p = 0.7083<br>bvFTD vs AD: -0.06 (-0.22, 0.10), p = 0.4693<br>PPA vs AP: -0.08 (-0.33, 0.18), p = 0.5553<br>PPA vs AD: -0.09 (-0.28, 0.09), p = 0.3384<br>AP vs AD: -0.01 (-0.28, 0.25), p = 0.9152 | PPA vs bvFTD: 0.06 (-0.28, 0.41), p = 0.7157<br>bvFTD vs AP: 0.24 (-0.22, 0.50), p = 0.0723<br>bvFTD vs AD: -0.16 (-0.54, 0.22), p = 0.4126<br>PPA vs AP: 0.30 (-0.10, 0.71), p = 0.1397<br>PPA vs AD: -0.95 (-0.59, 0.40), p = 0.7056<br>AP vs AD: -0.40 (-0.84, 0.04), p = 0.0775 | PPA vs bvFTD: -0.04 (-0.33, 0.25), p = 0.7904<br>FTD-ALS vs bvFTD: -0.53 (-0.69, -0.37), p = <0.0001<br>ALS vs bvFTD: -1.04 (-1.18, -0.90), p = <0.0001<br>bvFTD vs AD: -0.34 (-0.58, -0.10), p = 0.0052<br>PPA vs FTD-ALS: 0.49 (0.19, 0.79), p = 0.0016<br>PPA vs ALS: 1.00 (0.71, 1.30), p = <0.0001<br>PPA vs AD: -0.38 (-0.73, -0.03), p = 0.0334<br>ALS vs FTD-ALS: -0.51, (-0.69, -0.34), p = <0.0001<br>FTD-ALS vs AD: -0.87 (-1.13, -0.61), p = <0.0001<br>ALS vs AD: -1.38 (-1.63, -1.14), p = <0.0001 |

### Age at symptom onset subanalysis in *C9orf72* expansions carriers

A further AAO analysis was performed within the *C9orf72* group comparing those with a 'cognitive' presentation (combining clinical phenotypes of bvFTD, PPA, AD as well as DLB, VaD, and Dementia-NOS) with those with an ALS presentation:

- Mean (standard deviation) AAO in cognitive *C9orf72* group = 58.6 (10.2)
- Mean (standard deviation) AAO in cognitive *C9orf72* group = 57.0 (9.0)
- Using a mixed models analysis as described above, adjusted mean difference = -1.81 (95% confidence intervals -3.38, -0.24), p=0.0241

In other words, the cognitive *C9orf72* group had a significantly older AAO than the ALS group.

### Section 11: Disease duration analysis in MAPT mutation carriers

A mixed effect modelling approach was used to examine whether there were systematic differences in DD between those carrying *MAPT* mutations categorised by their functional consequences and underlying pathology into five groups:

- group 1 – mutations in exons 1,2 and 9;
- group 2 – mutations in exon/intron 10 affecting splicing;
- group 3 – mutations in exon 10 not affecting splicing;
- group 4 – mutations in exons 11-13 with non-paired helical filament (PHF)-tau pathology;
- group 5 – mutations in exon 11-13 with PHF-tau pathology group.

Results are shown in Supplementary Figure 4 and Supplementary Table 13.

**Supplementary Figure 4: Disease duration in patients with *MAPT* mutations grouped by type of mutation and pathology (median and interquartile range).**

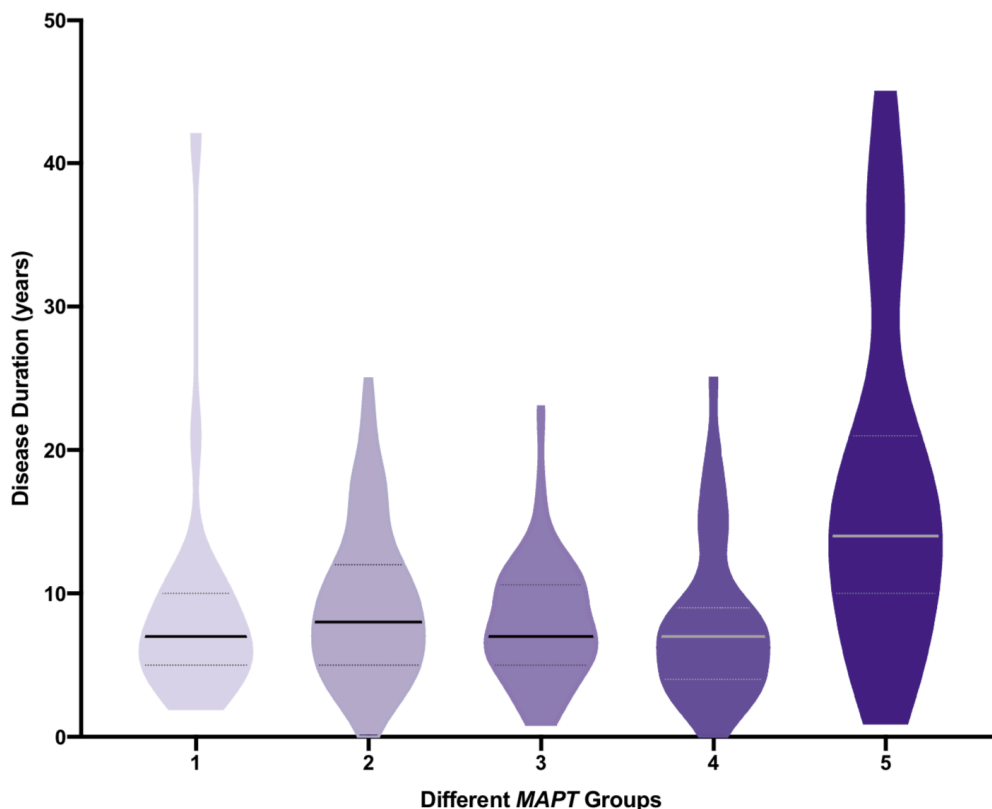

Group 1: R5H, R5L, G55R, K257T, I260V, L226V, G272V, IVS9-5T>C, IVS9-11G>C, IVS9-10G>C, IVS9-10G>T; Group 2: N279K, deltaK280, L284L, L284R, S285R, C291R, N296N, K298E, IVS10+3G>A, IVS10+4A>C, IVS10+11T>C, IVS10+12C>T, IVS10+12C>A, IVS10+13A>G, IVS10+14C>T, IVS10+15A>C, IVS10+16C>T, G303V, G304S, S305N, S305I, S305S; Group 3: P301T, P301S, P301L; Group 4: L315R, L315L, K317M, S320F, P332S, G335S, G335V, Q336H, E342V, S352L, S356T, V363A, P364S, G336R, K369I, E372G, G389R (2170G>A), G389R (2170G>C), T427M; Group 5: V337M, R406W.



**Supplementary Table 13: Adjusted mean (natural log) differences with 95% confidence intervals in disease duration between the *MAPT* groups.**

| <b>Group comparison</b> | <b>Adjusted mean difference (95% confidence intervals), p-value</b> |
|-------------------------|---------------------------------------------------------------------|
| 2 vs 1                  | 0.02 (-0.30, 0.33), p = 0.9250                                      |
| 3 vs 1                  | -0.15 (-0.54, 0.25), p = 0.4688                                     |
| 4 vs 1                  | -0.01 (-0.36, 0.33), p = 0.9537                                     |
| 5 vs 1                  | 0.64 (0.19, 1.08), p = 0.0049                                       |
| 3 vs 2                  | -0.16 (-0.49, 0.17), p = 0.3366                                     |
| 4 vs 2                  | -0.03 (-0.29, 0.24), p = 0.8525                                     |
| 5 vs 2                  | 0.62 (0.24, 1.00), p = 0.0016                                       |
| 4 vs 3                  | 0.14 (-0.22, 0.49), p = 0.4581                                      |
| 5 vs 3                  | 0.78 (0.33, 1.24), p = 0.0007                                       |
| 5 vs 4                  | 0.65 (0.24, 1.06), p = 0.0021                                       |

In summary, group 5 (i.e. the exon 11-13 with PHF-tau pathology group incorporating V337M and R406W mutations) had a significantly longer disease duration compared with all the other groups.

**Section 12: Modelling variability in age at onset and age at death**

**Supplementary Table 14: Variability in age at onset associated with family membership and with presence of a specific mutation. AAO: age at onset (years); CI: confidence interval; SD: standard deviation; N/A: not applicable (for *C9orf72* as only a single mutation).**

|                                                           | <i>GRN</i>        | <i>MAPT</i>       | <i>C9orf72</i>    |
|-----------------------------------------------------------|-------------------|-------------------|-------------------|
| <b>Adjusted mean (95%CI) AAO</b>                          | 60.7 (60.0, 61.4) | 48.6 (46.2, 50.9) | 58.1 (57.4, 58.7) |
| <b>Between family SD</b>                                  | 3.1               | 4.9               | 4.0               |
| <b>Within family SD</b>                                   | 8.1               | 6.7               | 8.9               |
| <b>% of variability (95%CI) accounted for by family</b>   | 14 (9, 22)        | 66 (56, 75)       | 17 (11, 26)       |
| <b>Between mutation SD</b>                                | 1.2               | 8.0               | N/A               |
| <b>% of variability (95%CI) accounted for by mutation</b> | 2 (0, 10)         | 48 (35, 62)       | N/A               |

**Supplementary Table 15: Variability in age at death associated with family membership and with presence of a specific mutation. AAD: age at death (years); CI: confidence interval; SD: standard deviation; N/A: not applicable (for *C9orf72* as only a single mutation).**

|                                                           | <i>GRN</i>        | <i>MAPT</i>       | <i>C9orf72</i>    |
|-----------------------------------------------------------|-------------------|-------------------|-------------------|
| <b>Adjusted mean (95%CI) AAD</b>                          | 68.5 (67.4, 69.7) | 57.1 (53.9, 60.2) | 65.3 (64.5, 66.2) |
| <b>Between family SD</b>                                  | 3.3               | 5.0               | 4.8               |
| <b>Within family SD</b>                                   | 8.8               | 7.0               | 9.8               |
| <b>% of variability (95%CI) accounted for by family</b>   | 20 (12, 30)       | 74 (65, 82)       | 19 (12, 29)       |
| <b>Between mutation SD</b>                                | 2.9               | 10.7              | N/A               |
| <b>% of variability (95%CI) accounted for by mutation</b> | 9 (3, 21)         | 61 (47, 73)       | N/A               |

**Discussion**

Little is known about either genetic or environmental factors modifying AAO, AAD or DD in people with *MAPT*, *GRN* or *C9orf72* mutations.

## *MAPT*

One recent study identified that the presence of the *APOE*  $\epsilon$ 4 genotype lowered AAO in those with FTD and tau pathology, including those with *MAPT* mutations<sup>84</sup> (although it did not look at *MAPT* mutation carriers separately to other tauopathies). However studies have yet to identify other modifying factors.

## *GRN*

Genetic factors affecting AAO in *GRN* mutation carriers include a polymorphism in *TMEM106B*<sup>85</sup>, with a lower AAO related to carrying the risk allele, and homozygous carriers of the protective allele rarely found in symptomatic *GRN* mutation carriers<sup>86</sup>. In the Basque IVS7-IG>A families one study has shown an earlier AAO in MM homozygous carriers at *PRNP* codon 129 compared with MV or VV carriers<sup>87</sup>. A number of studies have now identified inflammation as a key player in *GRN*-associated FTD pathogenesis<sup>88,89</sup>, and symptomatic patients with *GRN* mutations have a higher risk of also having a co-existent autoimmune disease<sup>90</sup>. It may be therefore that there are environmental factors related to an altered neuroinflammatory response (e.g. traumatic brain injury<sup>91</sup> or systemic inflammation) that modify AAO, that are currently poorly understood.

## *C9orf72*

A number of factors have now been studied as modifiers of AAO in *C9orf72* expansion carriers. There is contradictory evidence in terms of the relationship of expansion length to AAO<sup>92-95</sup>, with one recent study suggesting that the association was driven by age at blood sample collection<sup>94</sup> (implying that expansion length in blood may increase with age, although there is no evidence for this at present). Other studies have found that hypermethylation of the *C9orf72* 5'CpG island is a modifier<sup>95,96</sup>, with longer DD and later AAD<sup>96</sup>. Another study showed that DNA methylation age-acceleration is associated with a decrease in AAO and a shorter DD<sup>97</sup>. More recently, a study of *C9orf72* expansion carriers identified a locus on chromosome 6 containing two overlapping genes (*LOC101929163* and *C6orf10*) in which a polymorphism at rs9357140 was associated with a median AAO six years earlier in GG compared with AA carriers<sup>98</sup>. Lastly, a study of parental-offspring relationships in *C9orf72* revealed a significant correlation in AAO only in the mother-son relationship<sup>99</sup>, which they suggest may be related to unknown X-linked genetic modifiers. Environmental or lifestyle factors affecting AAO in *C9orf72* expansion carriers are currently unknown but may be revealed by large prospective cohort studies such as those underway in the FTD Prevention Initiative.

## References

84. Koriath C, Lashley T, Taylor W, Drueyeh R, Dimitriadis A, Denning N, Williams J, Warren JD, Fox NC, Schott JM, Rowe JB, Collinge J, Rohrer JD, Mead S. ApoE4 lowers age at onset in patients with frontotemporal dementia and tauopathy independent of amyloid- $\beta$  copathology. *Alzheimers Dement (Amst)*. 2019;11:277-280.
85. Nicholson AM, Rademakers R. What we know about TMEM106B in neurodegeneration. *Acta Neuropathol*. 2016; 132(5):639-651.
86. Pottier C, Zhou X, Perkerson RB 3rd, Baker M, Jenkins GD, Serie DJ, Ghidoni R, Benussi L, Binetti G, López de Munain A, Zulaica M, Moreno F, Le Ber I, Pasquier F, Hannequin D, Sánchez-Valle R, Antonell A, Lladó A, Parsons TM, Finch NA, Finger EC, Lippa CF, Huey ED, Neumann M, Heutink P, Synofzik M, Wilke C, Rissman RA, Slawek J, Sitek E, Johannsen P, Nielsen JE, Ren Y, van Blitterswijk M, DeJesus-Hernandez M, Christopher E, Murray ME, Bieniek KF, Evers BM, Ferrari C, Rollinson S, Richardson A, Scarpini E, Fumagalli GG, Padovani A, Hardy J, Momeni P, Ferrari R, Frangipane F, Maletta R, Anfossi M, Gallo M, Petrucelli L, Suh E, Lopez OL, Wong TH, van Rooij JGJ, Seelaar H, Mead S, Caselli RJ, Reiman EM, Noel Sabbagh M, Kjolby M, Nykjaer A, Karydas AM, Boxer AL, Grinberg LT, Grafman J, Spina S, Oblak A, Mesulam MM, Weintraub S, Geula C, Hodges JR, Piguet O, Brooks WS, Irwin DJ, Trojanowski JQ, Lee EB, Josephs KA, Parisi JE, Ertekin-Taner N, Knopman DS, Nacmias B, Piaceri I, Bagnoli S, Sorbi S, Gearing M, Glass J, Beach TG, Black SE, Masellis M, Rogaeve E, Vonsattel JP, Honig LS, Kofler J, Bruni AC, Snowden J, Mann D, Pickering-Brown S, Diehl-Schmid J, Winkelmann J, Galimberti D, Graff C, Öijersted L, Troakes C, Al-Sarraj S, Cruchaga C, Cairns NJ, Rohrer JD, Halliday GM, Kwok JB, van Swieten JC, White CL 3rd, Ghetti B, Murrell JR, Mackenzie IRA, Hsiung GR, Borroni B, Rossi G, Tagliavini F, Wszolek ZK, Petersen RC, Bigio EH, Grossman M, Van Deerlin VM, Seeley WW, Miller BL, Graff-Radford NR, Boeve BF, Dickson DW, Biernacka JM, Rademakers R. Potential genetic modifiers of disease risk and age at onset in patients with frontotemporal lobar degeneration and GRN mutations: a genome-wide association study. *Lancet Neurol*. 2018;17(6):548-558.
87. Moreno F, Alzualde A, Cambor PM, Barandiaran M, Van Deerlin VM, Gabilondo A, Martí Massó JF, López de Munain A, Indakoetxea B. Prion protein codon 129 polymorphism modifies age at onset of frontotemporal dementia with the C.709-1G>A progranulin mutation. *Alzheimer Dis Assoc Disord*. 2011;25(1):93-5.
88. Bossù P, Salani F, Alberici A, Archetti S, Bellelli G, Galimberti D, Scarpini E, Spalletta G, Caltagirone C, Padovani A, Borroni B. Loss of function mutations in the progranulin gene are related to pro-inflammatory cytokine dysregulation in frontotemporal lobar degeneration patients. *J Neuroinflammation*. 2011;8:65.
89. Martens LH, Zhang J, Barmada SJ, Zhou P, Kamiya S, Sun B, Min SW, Gan L, Finkbeiner S, Huang EJ, Farese RV Jr. Progranulin deficiency promotes neuroinflammation and neuron loss following toxin-induced injury. *J Clin Invest*. 2012;122(11):3955-9.
90. Miller ZA, Rankin KP, Graff-Radford NR, Takada LT, Sturm VE, Cleveland CM, Criswell LA, Jaeger PA, Stan T, Heggeli KA, Hsu SC, Karydas A, Khan BK, Grinberg LT, Gorno-Tempini ML, Boxer AL, Rosen HJ, Kramer JH, Coppola G, Geschwind DH, Rademakers R, Seeley WW, Wyss-Coray T, Miller BL. TDP-43 frontotemporal lobar degeneration and autoimmune disease. *J Neurol Neurosurg Psychiatry*. 2013;84(9):956-62.
91. Menzel L, Kleber L, Friedrich C, Hummel R, Dangel L, Winter J, Schmitz K, Tegeder I, Schäfer MK. Progranulin protects against exaggerated axonal injury and astrogliosis following traumatic brain injury. *Glia*. 2017;65(2):278-292.
92. van Blitterswijk M, DeJesus-Hernandez M, Niemantsverdriet E, Murray ME, Heckman MG, Diehl NN, Brown PH, Baker MC, Finch NA, Bauer PO, Serrano G, Beach TG, Josephs KA, Knopman DS, Petersen RC, Boeve BF, Graff-Radford NR, Boylan KB, Petrucelli L, Dickson DW, Rademakers R. Association between repeat sizes and clinical and pathological characteristics in carriers of C9ORF72 repeat expansions (Xpansize-72): a cross-sectional cohort study. *Lancet Neurol*. 2013;12(10):978-88.

93. Nordin A, Akimoto C, Wuolikainen A, Alstermark H, Jonsson P, Birve A, Marklund SL, Graffmo KS, Forsberg K, Brännström T, Andersen PM. Extensive size variability of the GGGGCC expansion in C9orf72 in both neuronal and non-neuronal tissues in 18 patients with ALS or FTD. *Hum Mol Genet.* 2015;24(11):3133-42.
94. Fournier C, Barbier M, Camuzat A, Anquetil V, Lattante S, Clot F, Cazeneuve C, Rinaldi D, Couratier P, Deramecourt V, Sabatelli M, Belliard S, Vercelletto M, Forlani S, Jornea L; French Clinical and Genetic Research Network on FTL/FTLD-ALS; PREVDEMALS and FTL/Exome Study Groups, Leguern E, Brice A, Le Ber I. Relations between C9orf72 expansion size in blood, age at onset, age at collection and transmission across generations in patients and presymptomatic carriers. *Neurobiol Aging.* 2019;74:234.e1-234.e8.
95. Gijssels I, Van Mossevelde S, van der Zee J, Sieben A, Engelborghs S, De Bleecker J, Ivanoiu A, Deryck O, Edbauer D, Zhang M, Heeman B, Bäumer V, Van den Broeck M, Mattheijssens M, Peeters K, Rogaeva E, De Jonghe P, Cras P, Martin JJ, de Deyn PP, Cruts M, Van Broeckhoven C. The C9orf72 repeat size correlates with onset age of disease, DNA methylation and transcriptional downregulation of the promoter. *Mol Psychiatry.* 2016;21(8):1112-24.
96. Russ J, Liu EY, Wu K, Neal D, Suh E, Irwin DJ, McMillan CT, Harms MB, Cairns NJ, Wood EM, Xie SX, Elman L, McCluskey L, Grossman M, Van Deerlin VM, Lee EB. Hypermethylation of repeat expanded C9orf72 is a clinical and molecular disease modifier. *Acta Neuropathol.* 2015;129(1):39-52.
97. Zhang M, Tartaglia MC, Moreno D, Sato C, McKeever P, Weichert A, Keith J, Robertson J, Zinman L, Rogaeva E. DNA methylation age-acceleration is associated with disease duration and age at onset in C9orf72 patients. *Acta Neuropathol.* 2017;134(2):271-279.
98. Zhang M, Ferrari R, Tartaglia MC, Keith J, Surace EI, Wolf U, Sato C, Grinberg M, Liang Y, Xi Z, Dupont K, McGoldrick P, Weichert A, McKeever PM, Schneider R, McCorkindale MD, Manzoni C, Rademakers R, Graff-Radford NR, Dickson DW, Parisi JE, Boeve BF, Petersen RC, Miller BL, Seeley WW, van Swieten JC, van Rooij J, Pijnenburg Y, van der Zee J, Van Broeckhoven C, Le Ber I, Van Deerlin V, Suh E, Rohrer JD, Mead S, Graff C, Oijerstedt L, Pickering-Brown S, Rollinson S, Rossi G, Tagliavini F, Brooks WS, Dobson-Stone C, Halliday GM, Hodges JR, Piguet O, Binetti G, Benussi L, Ghidoni R, Nacmias B, Sorbi S, Bruni AC, Galimberti D, Scarpini E, Rainero I, Rubino E, Clarimon J, Lleó A, Ruiz A, Hernandez I, Pastor P, Diez-Fairen M, Borroni B, Pasquier F, Deramecourt V, Lebouvier T, Pernecky R, Diehl-Schmid J, Grafman J, Huey ED, Mayeux R, Nalls MA, Hernandez D, Singleton A, Momeni P, Zeng Z, Hardy J, Robertson J, Zinman L, Rogaeva E. International FTDGC A6orf10/LOC101929163 locus is associated with age of onset in C9orf72 carriers. *Brain* 2018;141:2895-2907.
99. Barbier M, Camuzat A, Houot M, Clot F, Caroppo P, Fournier C, Rinaldi D, Pasquier F, Hannequin D, Pariente J, Larcher K; French Clinical and Genetic Research Network on FTD/FTD-ALS\*; Predict-PGRN & PrevDemAls Study Groups†, Brice A, Génin E, Sabbagh A, Le Ber I. Factors influencing the age at onset in familial frontotemporal lobar dementia: Important weight of genetics. *Neurol Genet.* 2017;3(6):e203.
